# Supplementary material
Source: Royal Society of Chemistry journal article supplement (doi:10.1039/d6gc01483f)
Supplement: d6gc01483f1.pdf [file d6gc01483f1.pdf]

# Supporting Information for

## Enantiocomplementary Synthesis of Chiral 2,3-Dihydroxy Aryl Ketones via ThDP-Dependent Enzymatic Catalysis

Dan Li,<sup>[1]</sup> Zheng Zhu,<sup>[1]</sup> Xiaoyu Chen,<sup>[1]</sup> Xuesi Chen,<sup>[1]</sup> Liming Ouyang,<sup>1</sup> Huangong Li,<sup>[1, 2]\*</sup>  
Lixin Zhang,<sup>[1]</sup> Yongtao Xie <sup>[1]\*</sup>

<sup>1</sup>State Key Laboratory of Bioreactor Engineering, East China University of Science and  
Technology; Shanghai, 200237, China.

<sup>2</sup>Shenzhen Institutes of Advanced Technology, Chinese Academy of Sciences; Shenzhen,  
518055, China.

\*Corresponding author. Email: lhg\_2018@126.com, ytxie123@ecust.edu.cn

†These authors contributed equally to this work.

|                                                                                                                 |    |
|-----------------------------------------------------------------------------------------------------------------|----|
| 1. General information.....                                                                                     | 3  |
| 2. Expression of recombinant ThDP-dependent enzymes.....                                                        | 3  |
| 3. Screening procedure of wild-type ThDP-dependent enzymes .....                                                | 3  |
| 4. Construction of <i>PfBAL</i> and <i>PaBAL</i> libraries .....                                                | 4  |
| 4.1 Molecular docking.....                                                                                      | 4  |
| 4.2 PCR procedure of <i>PfBAL</i> and <i>PaBAL</i> .....                                                        | 4  |
| 5. Screening of <i>PfBAL</i> and <i>PaBAL</i> mutant libraries and purification of <i>PaBAL</i> M3 mutants..... | 5  |
| 6. The activity assay of <i>PaBAL</i> and <i>PaBAL</i> M3 .....                                                 | 5  |
| 8. General procedure for exploring the substrate scope.....                                                     | 6  |
| 9. Transformation.....                                                                                          | 6  |
| 9.1 The chemical transformation of chiral 2, 3-dihydroxy aryl ketone 3a <sup>[3]</sup> .....                    | 7  |
| 9.2 Scaled-up biotransformation of 3a, 3c, 3d and 3o.....                                                       | 7  |
| 10. Supplementary Figures .....                                                                                 | 7  |
| 11. Supplementary Tables .....                                                                                  | 18 |
| 12. Substrate Scope of Aliphatic Aldehydes .....                                                                | 27 |
| 13. The higher substrate concentrations of 1c and 2 for <i>PfBAL</i> _A28S.....                                 | 29 |
| 14. Kinetic characterisation of positive wild-type <i>PaBAL</i> and <i>PaBAL</i> M3 towards 1a or 2 30          |    |
| 15. Molecular dynamic simulations.....                                                                          | 32 |
| 16. The cost and economic analysis .....                                                                        | 34 |
| 17. Characterization data of the products .....                                                                 | 36 |
| 18. NMR Spectra of products.....                                                                                | 44 |
| 19. HPLC Spectra of chiral compounds .....                                                                      | 66 |
| 20. Supplementary References.....                                                                               | 78 |
| 21. Sequences of proteins .....                                                                                 | 79 |

## 1. General information

Reagents for molecular biology were obtained from TOYOBO, Thermo Scientific and Omega Biotek. Kanamycin, Ampicillin and isopropyl- $\beta$ -D-thiogalactopyranoside (IPTG) were purchased from Shanghai Yuanye Biotechnology Co. Ltd. The medium used in the laboratory is lysogeny broth medium (LB) containing 10 g/L tryptone, 5 g/L yeast extract and 10 g/L NaCl. All chemical reagents and all substrates were obtained from commercial sources unless otherwise noted, including aromatic aldehyde.

Thin-layer chromatography (TLC) analysis was carried out on silica gel GF254 plates, with visualization under UV light at 254 nm. The column chromatography separation was carried out using 200-300 mesh silica gel. The samples were analyzed by an Agilent HPLC system equipped with a variable wavelength detector (VWD), using Avantor ACE 5 C18-PFP column (250 mm  $\times$  4.6 mm, 5  $\mu$ m, Agilent) and chiral Daicel Chiralpak IA column (250 mm  $\times$  4.6 mm, 5  $\mu$ m).  $^1\text{H}$  NMR,  $^{19}\text{F}$  NMR and  $^{13}\text{C}$  NMR spectra were recorded on a Bruker AMX400 spectrometer. The following reference values were used:  $\text{CDCl}_3$  ( $^1\text{H}$  NMR:  $\delta$  7.26;  $^{13}\text{C}$  NMR:  $\delta$  77.16),  $\text{DMSO-}d_6$  ( $^1\text{H}$  NMR:  $\delta$  2.50;  $^{13}\text{C}$  NMR:  $\delta$  39.52)  $\text{D}_2\text{O}$  ( $^1\text{H}$  NMR:  $\delta$  4.79), Multiplicities are abbreviated as follows: s = singlet, d = doublet, t = triplet, q = quartet, m = multiplet, dd = doublet of doublets. High resolution mass spectra (HRMS) (EI $^-$ ) were recorded on Thermo Scientific Q Exactive Orbitrap mass spectrometer. The enantiomeric excess (ee.) was determined by normal phase-high performance liquid chromatography using *n*-hexane and isopropanol as mobile phase. The yields measured by reversed phase-high performance liquid chromatography (RP-HPLC) were calculated with calibration curves. The mobile phase used in RP-HPLC was formic acid water (0.1% ) and acetonitrile (60% : 40% respectively).

## 2. Expression of recombinant ThDP-dependent enzymes

The genes of the ThDP-dependent enzymes were all synthesized by Nanjing Genscript Biotechnology Co., Ltd. Recombinant ThDP-dependent enzymes cloned into pET28a (+) or pET21a (+) were expressed in *E. coli* BL21 (DE3) cell and were cultivated overnight at 37  $^\circ\text{C}$  in 4 mL LB supplemented with 50  $\mu\text{g}/\text{mL}$  ampicillin or kanamycin. Then the culture was transferred into 100 mL LB containing 50  $\mu\text{g}/\text{mL}$  ampicillin or kanamycin at a 1% inoculation volume in a 250 mL baffled flask and incubated at 37  $^\circ\text{C}$  and 220 rpm. When the  $\text{OD}_{600}$  reached 0.6~0.8, it was then cooled in an ice bath for 25 minutes and 1.0 mM IPTG (final concentration) was to induce protein expression at 16  $^\circ\text{C}$  for 18-20 h. The cells were collected by centrifugation at 9,000 rpm and pour out the upper liquid, then the stored at -40  $^\circ\text{C}$  for the purity of enzymes or the subsequent whole-cell reaction immediately.

## 3. Screening procedure of wild-type ThDP-dependent enzymes

The analytical reaction mixture contained benzaldehyde (**1a**, 0.04 mmol, 100 mM), 1,4-dioxane-2,5-diol (**2**, 0.04 mmol, 100 mM), 5% DMSO (v/v), 0.15 mM ThDP, 2.5 mM MgSO<sub>4</sub> and whole cell of wild-type enzymes in potassium phosphate buffer (100 mg/mL, PBS, 50 mM, pH 8.0, 0.4 mL). For the *Pa*BAL reaction condition: (**1a**, 0.02 mmol, 50 mM), 1,4-dioxane-2,5-diol (**2**, 0.02 mmol, 50 mM), 5% DMSO (v/v), 0.15 mM ThDP, 2.5 mM MgSO<sub>4</sub> and whole cell (200 mg/mL, PBS, 50 mM, pH 8.0, 0.4 mL). The reaction mixture was shaken at 30 °C for 12 h or 24 h and then added 1 mL MeOH to quench the reaction and the yields were measured using HPLC based on the calibration curves.

#### 4. Construction of *Pf*BAL and *Pa*BAL libraries

##### 4.1 Molecular docking

The crystal structure of *Pf*BAL (PDB code: 3D7K) was gained in the PDB database (as receptor) and the homology model of *Pa*BAL was constructed by AlphaFold 2<sup>[1]</sup>(as receptor) and the volume of the binding pocket were shown online (<https://proteins.plus/>), assisting in handling docking ligand (the product of the Breslow intermediate attacking the **1a**) into the receptor. Molecular docking study was performed with the AutoDock vina (1.1.2) software<sup>[2]</sup>. Then *Pf*BAL and *Pa*BAL molecular was removed water and added hydrogen atoms and the energy of ligand was minimized by Chemdraw 3D for the docking. To include all possible binding conformations, a large grid box centered at the sulfur atom of ThDP comprising 70 × 70 × 70 grids with the grid spacing of 0.375 Å was used for the docking calculations. The lowest-energy conformation was selected and visualized in PyMOL. The selected hot sites within 4 Å of the *Pf*BAL active pocket were A28, L112, Q113 and the optional sites within 4 Å of the *Pa*BAL active pocket were L116, Q117, G396, H417, G421, M480, M556, Y571 for site-directed saturation mutagenesis (SSM) (**Figure S2A and S2B**).

##### 4.2 PCR procedure of *Pf*BAL and *Pa*BAL

To construct the *Pf*BAL and *Pa*BAL mutants, specific primers were designed based on the intended amino acid substitutions (**Tables S2-S4, S6-S14**). The wild-type *Pf*BAL and *Pa*BAL plasmid or constructed mutant plasmids served as the templates for PCR amplification. PCR was performed in a total volume of 25 µL, containing 0.5 µL plasmid template, 1 µL of each forward and reverse primer, 12.5 µL of KOD One™ PCR Master Mix, and 11 µL of ddH<sub>2</sub>O. The thermal cycling conditions were as follows: initial denaturation at 98 °C for 45 s; 30 cycles of 98 °C for 15 s, annealing at (minimum T<sub>m</sub>-5) °C for 30 s, and extension at 68 °C for 150 s; followed by a final extension at 68 °C for 150 s. The PCR products were purified using a PCR Clean-Up Kit and directly transformed into *E. coli* BL21 (DE3) competent cells. The transformation mixture was spread on LB-agar plates supplemented with 50 µg/mL ampicillin or kanamycin and

incubated overnight at 37 °C. Single colony from each plate was picked into 4 mL of LB broth containing 50 µg/mL ampicillin or kanamycin in 10 mL culture tubes and grown overnight at 37 °C. Then DNA was sequenced by Tsingke Biotech (Beijing, China) and subsequently used for large-scale culture.

## **5. Screening of *PfBAL* and *PaBAL* mutant libraries and purification of *PaBAL* M3 mutants**

**For *PfBAL* mutant libraries:** The analytical reaction mixture was composed of **1a** (0.04 mmol, 100 mM), compound **2** (0.04 mmol, 100 mM), 5% (v/v) DMSO, ThDP (0.15 mM), MgSO<sub>4</sub> (2.5 mM), and 0.4 mL of 50 mM PBS (pH 8.0) containing 60 mg/mL whole cells of *PfBAL* mutants. The reaction mixture was shaken at 30 °C for 6 h and then added 1 mL MeOH to quench the reaction and the yields were determined using RP-HPLC analysis based on the calibration curves.

**For *PaBAL* mutant libraries:** The analytical reaction mixture was composed of **1a** (0.02 mmol, 50 mM), compound **2** (0.02 mmol, 50 mM), 5% (v/v) DMSO, ThDP (0.15 mM), MgSO<sub>4</sub> (2.5 mM), and 0.4 mL of 50 mM PBS (pH 8.0) containing 200 mg/mL whole cells of *PaBAL* mutants. The reaction mixture was shaken at 30 °C for 24 h and then added 1 mL MeOH to quench the reaction and the yields were determined using RP-HPLC analysis based on the calibration curves.

### **Purification of *PaBAL* M3 mutants**

The fresh wet cells containing *PaBAL* M3 mutants were resuspended in 50 mM phosphate buffer (PBS). After sonication, the crude lysate containing 6×His-tagged proteins were loaded into Ni-NTA affinity chromatography. The target proteins were subsequently eluted with elution buffer containing 200 mM imidazole, 50 mM potassium phosphate (pH 8.0). The eluted fraction was dialyzed using 30 kDa molecular weight cut-off (MWCO) ultrafiltration tubes centrifuged at 3,200 rpm for 4 times. The final protein concentration was determined in triplicate by measuring the absorbance at 280 nm using a NanoDrop spectrophotometer, with extinction coefficients corrected via the ExpASy ProtParam tool (<https://web.expasy.org/protparam/>). The purified enzymes were stored at –80 °C for subsequent assays (SDS-PAGE in **Figure S7**).

## **6. The activity assay of *PaBAL* and *PaBAL* M3**

One unit (U) is defined as the amount of enzyme that catalyzes the formation of 1 µmol of 2,3-dihydroxy aryl ketone from aldehydes per minute at 30 °C.

The reaction mixture (400 µL) was composed of **1a** (5 mM or 10 mM), compound **2** (5 mM or 10mM), 5% (v/v) DMSO, ThDP (0.15 mM), MgSO<sub>4</sub> (2.5 mM), 50 mM PBS (pH 8.0). The reaction was initiated by adding pure enzyme (1 mg). After all additions, shake the reaction at 30 °C for 10-30 minutes. It was then quenched with 1 mL of MeOH

and centrifuged at 12,000 rpm for 1 minutes. The product was analyzed by RP-HPLC using an ACE 5 C18-PFP column (mobile phase: H<sub>2</sub>O with 0.1% formic acid and CH<sub>3</sub>CN in a 60 : 40 ratio) based on the calibration curves.

## 7. General procedure for the synthesis of racemic 2, 3-dihydroxyketone

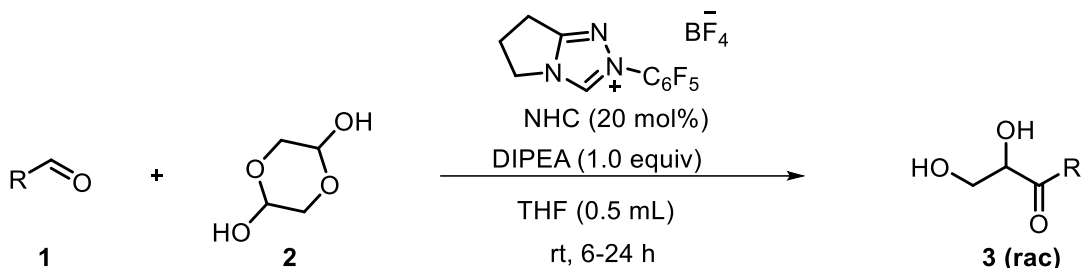

To a solution of aldehyde **1** (0.05 mmol) and **2** (2.0 equiv.) in THF (0.5 mL) was added NHC (20 mol%), followed by *N,N*-diisopropylethylamine (DIPEA, 1.0 equiv.). The mixture was stirred at room temperature for 24 h. The reaction mixture was then directly subjected to preparative thin-layer chromatography (prep-TLC) to obtain the racemic products **3**. The silica gel band containing the target product **3** was collected, and the product was eluted with ethanol. The resulting solution was filtered through a membrane filter to prepare a sample for HPLC analysis for chiral resolution.

## 8. General procedure for exploring the substrate scope

**PfBAL\_A28S**: The reaction mixture contains substrate **1** (0.04 mmol, 100 mM), **2** (0.04 mmol, 100 mM), DMSO (5%, v/v), ThDP (0.15 mM), MgSO<sub>4</sub> (2.5 mM) and PBS (50 mM, pH 8.0, 0.4 mL) supplemented with 60 mg/mL whole cell of *PfBAL\_A28S*. And the reactions were shaken at 1000 rpm, 30 °C for 12 h on the dry thermostat metal bath JX-10. (The reaction of **1k**, **1o** and **1s** used at the 120 mg/mL whole cell of *PfBAL\_A28S* and the reaction time for 24 h). Then 1 mL EtOAc was added to the reaction (three times) and extracted the products by centrifugation at 12,000 rpm for 1 min. The product was concentrated by the rotary evaporator and added 0.5 mL EtOAc containing 1,3,5-trimethoxybenzene (0.5 equiv.) as internal standard. The yields were determined by <sup>1</sup>H NMR.

**PaBAL M3**: The reaction mixture contains substrate **1** (0.02 mmol, 33 mM), **2** (0.02 mmol, 33 mM), DMSO (5%, v/v), ThDP (0.15 mM), MgSO<sub>4</sub> (2.5 mM), 0.3% loading of the *PaBAL M3* purified enzyme and PBS (50 mM, pH 8.0, 384.75 μL) in total 0.5 mL. And the reactions were shaken at 1000 rpm and 30 °C for 24 h on the dry thermostat metal bath JX-10. 1 mL MeOH was added into the mixture and centrifuge mixture at 12,000 rpm for 1 min. The yields were determined based on the calibration curves using RP-HPLC.

## 9. Transformation

### 9.1 The chemical transformation of chiral 2, 3-dihydroxy aryl ketone **3a**<sup>[3]</sup>

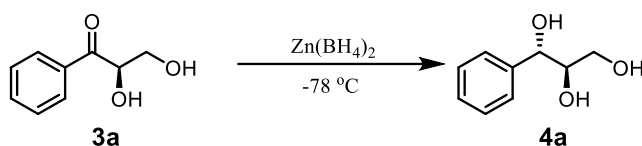

**3a** (0.6 mmol) was dissolved in dry DCM (4 mL) and placed in  $-78\text{ }^\circ\text{C}$  stirring for 5 min under  $\text{N}_2$  atmosphere,  $\text{Zn}(\text{BH}_4)_2$  (2 equiv.) was added dropwise with stirring. The reaction was stirred for 2 h at this temperature before being quenched by the addition of saturated aqueous solution of ammonium chloride (approximately 5 mL). The mixture was extracted with DCM (note: most of product **4a** exist in aqueous phase) and the pure compound **4a** was purified by silica gel flash chromatography.

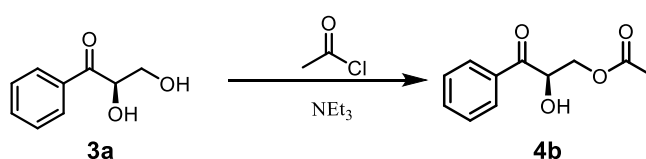

To the solution of **3a** (0.6 mmol) dissolved in a 10 mL round bottomed flask was added  $\text{NEt}_3$  (1.5 equiv.), acetyl chloride (1.02 equiv.) was added dropwise at  $0\text{ }^\circ\text{C}$ . Then the reaction warmed to room temperature with stirring for 2 h and concentrated under reduced pressure. The residue was purified by silica gel flash chromatography to afford product **4b**.

### 9.2 Scaled-up biotransformation of **3a**, **3c**, **3d** and **3o**

A 40 mL-scale preparative reaction consisted of substrate **1a** (4 mmol), **2** (4 mmol), 5% (v/v) DMSO, 0.15 mM ThDP, 2.5 mM  $\text{MgSO}_4$ , and 40 mL of 60 mg/mL *PfBAL\_A28S* whole-cell suspension in 50 mM PBS buffer (pH 8.0). The mixture was shaken at 220 rpm and  $30\text{ }^\circ\text{C}$  for 24 h. The reaction mixture was extracted with EtOAc (80 mL  $\times$  4), dried over anhydrous  $\text{Na}_2\text{SO}_4$ , and concentrated by rotary evaporation. The residue was purified via column chromatography to yield product **3a** (0.59 g, 89% ee). The procedure of products **3c**, **3d** and **3o** was similar to that of **3a**.

## 10. Supplementary Figures

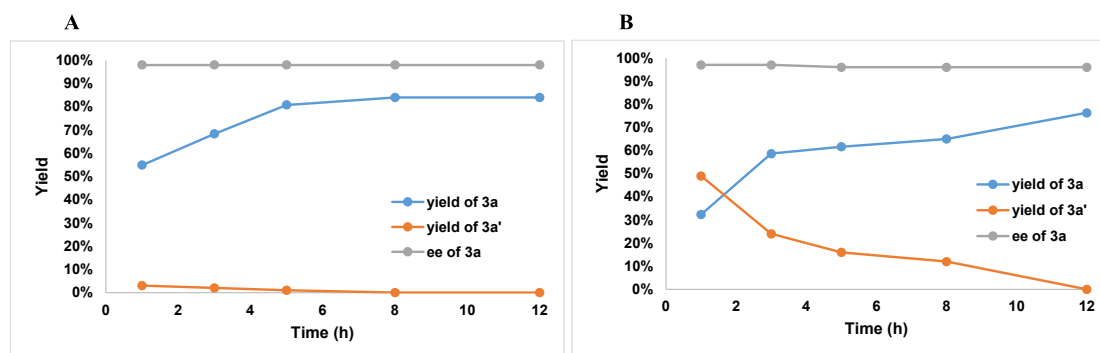

**Figure S1.** Reaction progress curve. A) process of *PfBAL\_A28S* catalysis; B) process

of wild-type *Pf*BAL catalysis.

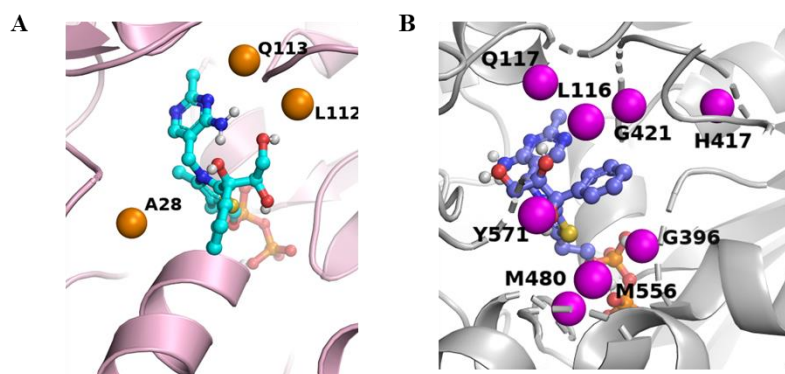

**Figure S2.** (A) Three hotspots of *Pf*BAL active pocket, shown in orange spheres; (B) Eight hotspots of *Pa*BAL active pocket, shown in magenta spheres.

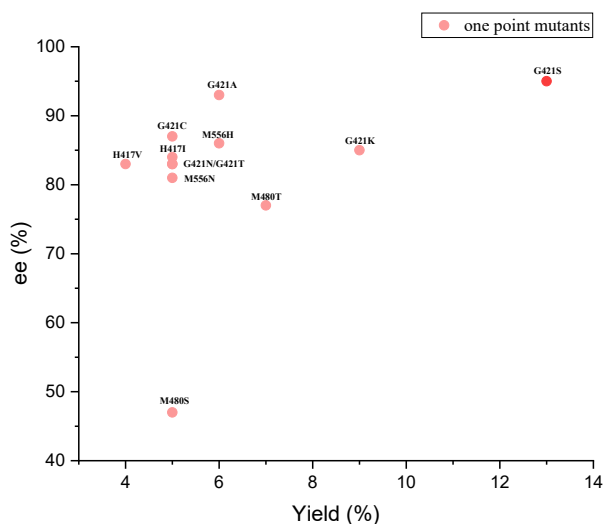

**Figure S3.** The result of the first round of mutation of *Pa*ABL. Only the part of mutants that showed a response were displayed and *Pa*BAL\_G421S was the best mutant that showed by red colour. And the other mutants not shown had no or trace response. The reaction condition: **1a** (0.02 mmol, 50 mM), **2** (0.02 mmol, 50 mM), DMSO (5%, v/v), ThDP (0.15 mM), MgSO<sub>4</sub> (2.5 mM) and PBS (50 mM, pH 8.0, 0.4 mL) containing 200 mg/mL whole cell of *Pa*BAL mutants, 30 °C, 24 h.

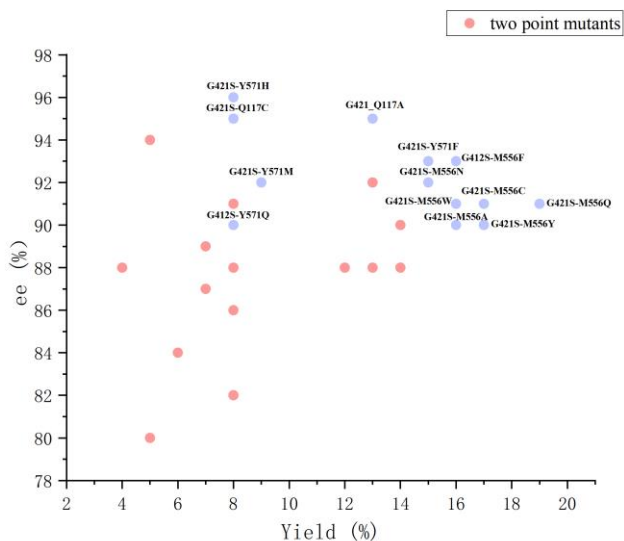

**Figure S4.** The result of the second round of mutation of *PaABL*. Only the part of mutants that showed a response were displayed. The magenta spheres respectively indicated the best second round of mutants of G421\_Q117, G421\_M556 and G421\_Y571. The reaction reaction: **1a** (0.02 mmol, 50 mM), **2** (0.02 mmol, 50 mM), DMSO (5%, v/v), ThDP (0.15 mM), MgSO<sub>4</sub> (2.5 mM) and PBS (50 mM, pH 8.0, 0.4 mL) containing 200 mg/mL whole cell of *PaBAL* mutants, 30 °C, 24 h.

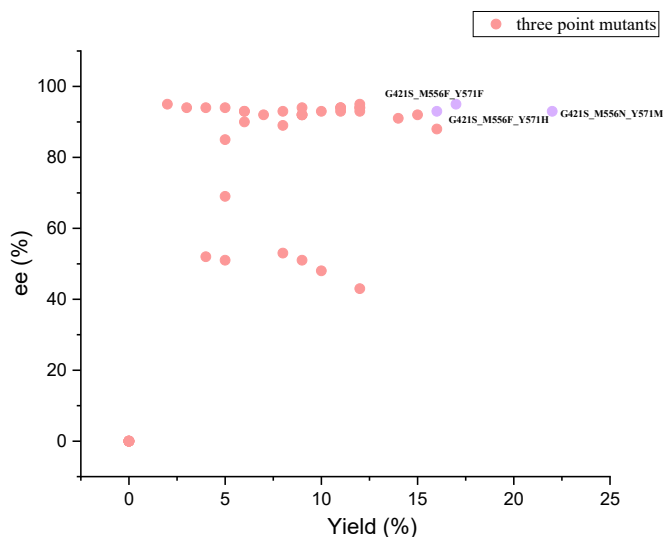

**Figure S5.** The result of the third of mutation of *PaABL*. Some points overlap multiple mutants. The pink spheres respectively indicated the relatively good third round of mutants of G421\_M556F\_571F, G421\_M556N\_571M and G421\_M556F\_Y571H. The reaction reaction: **1a** (0.02 mmol, 50 mM), **2** (0.02 mmol, 50 mM), DMSO (5 %, v/v), ThDP (0.15 mM), MgSO<sub>4</sub> (2.5 mM) and PBS (50 mM, pH 8.0, 0.4 mL) containing 200 mg/mL whole cell of *PaBAL* mutants, 30 °C, 24 h.

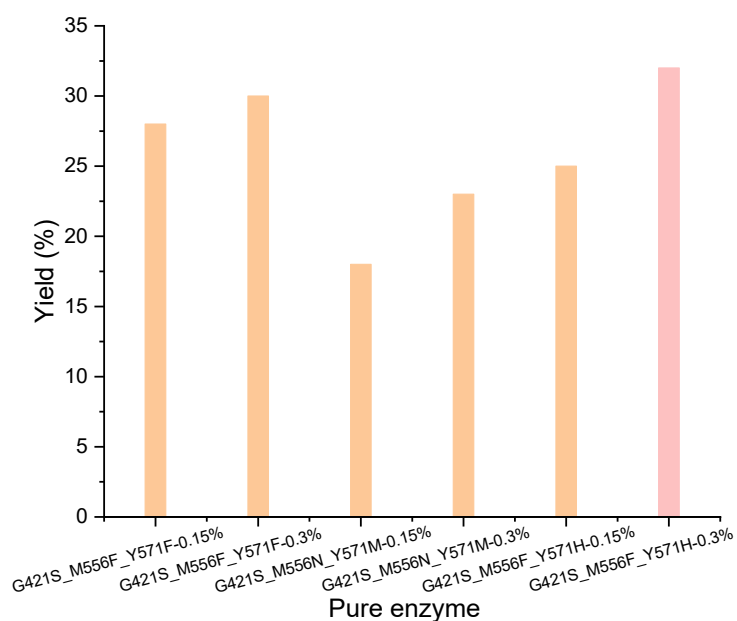

**Figure S6.** The result of different loading of pure *PaABL* mutants in the third round campaign. The reaction reaction: **1a** (0.02 mmol, 50 mM), **2** (0.02 mmol, 50 mM), DMSO (5%, v/v), ThDP (0.15 mM), MgSO<sub>4</sub> (2.5 mM) and 0.15% or 0.3% loading pure *PaBAL* mutants, 30 °C, 24 h.

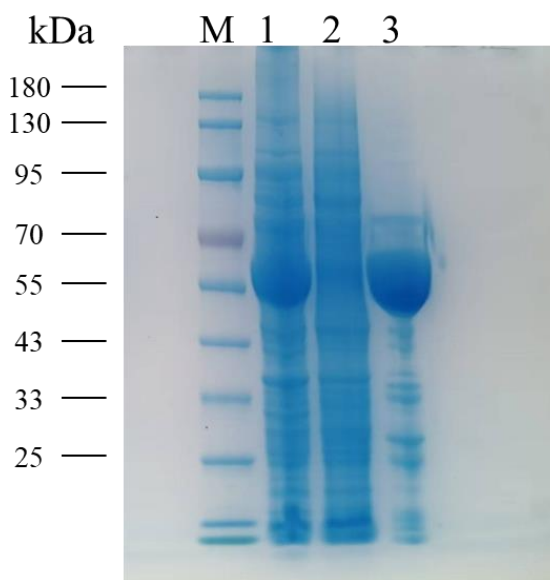

**Figure S7.** SDS-PAGE. M: protein maker; 1: crude *PfBAL*\_A28S; 2: crude *PaBAL*; 3: *PaBAL* M3 (pure). (Molecular weight of *PfBAL*: 58.9 kDa; *PaBAL*: 59.5 kDa)

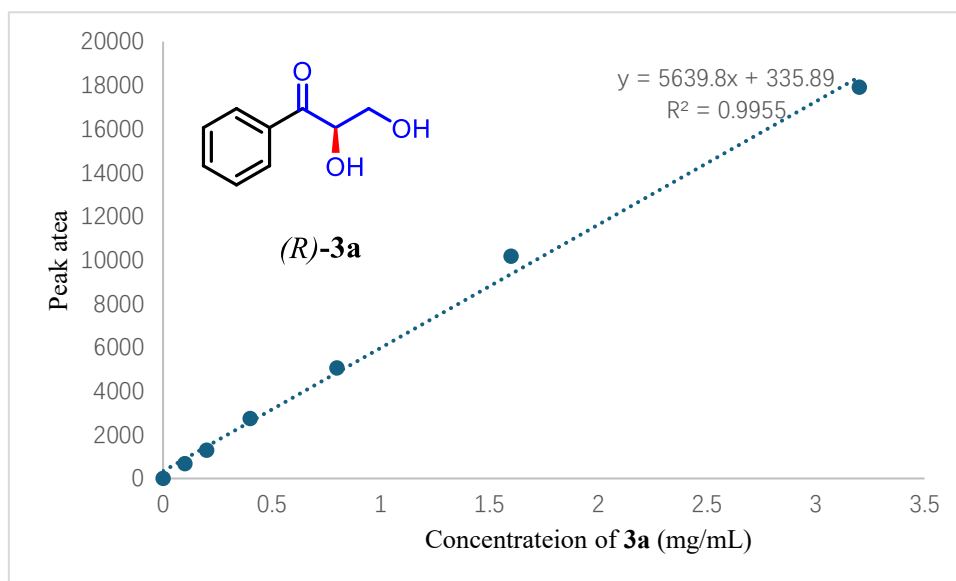

**Figure S8.** Calibration curve of **3a** used for yield determination by RP-HPLC

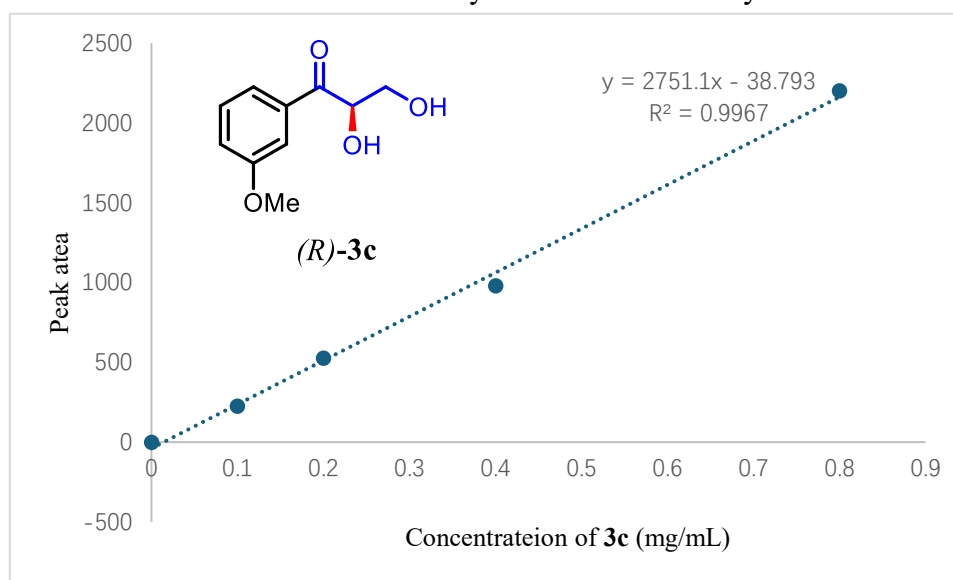

**Figure S9.** Calibration curve of **3c** used for yield determination by RP-HPLC.

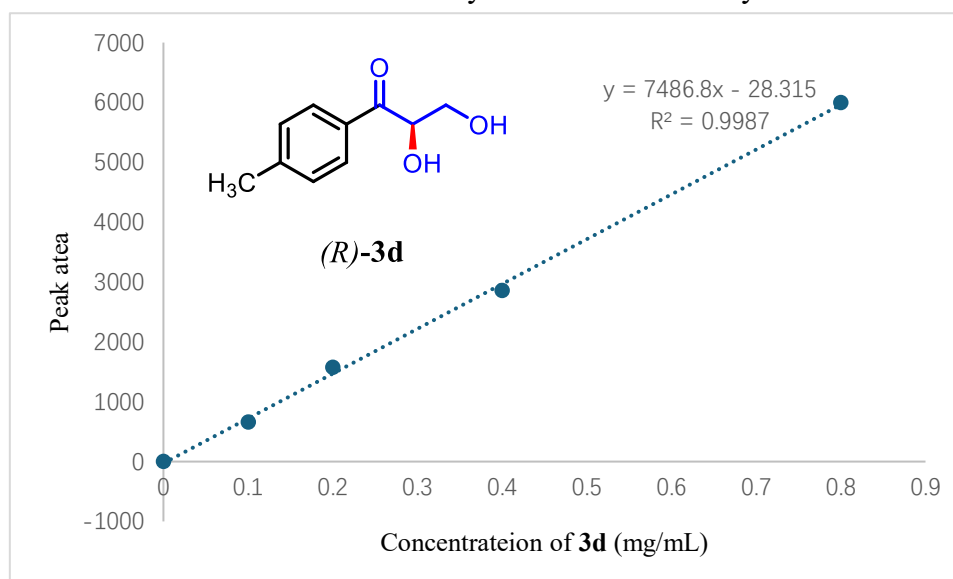

**Figure S10.** Calibration curve of **3d** used for yield determination by RP-HPLC.

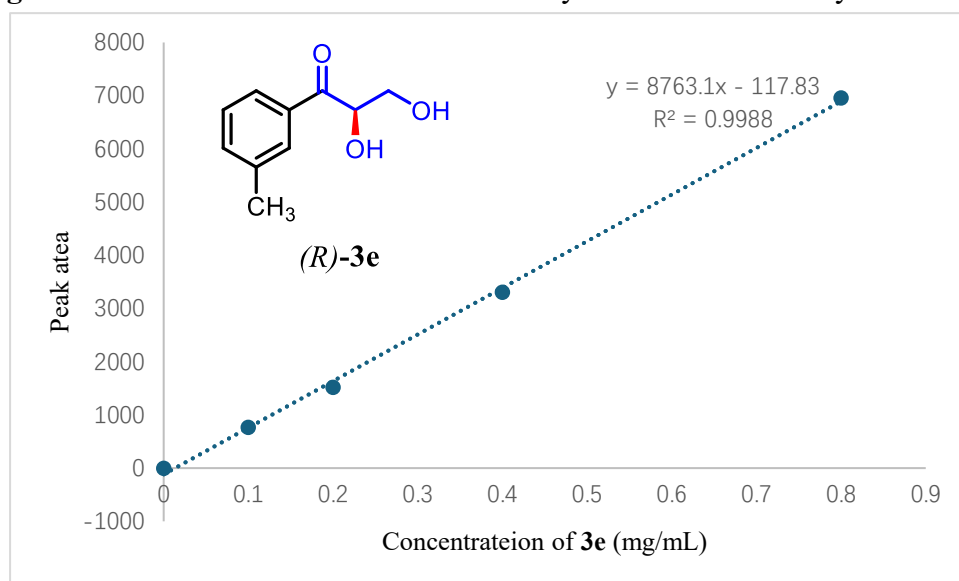

**Figure S11.** Calibration curve of **3e** used for yield determination by RP-HPLC.

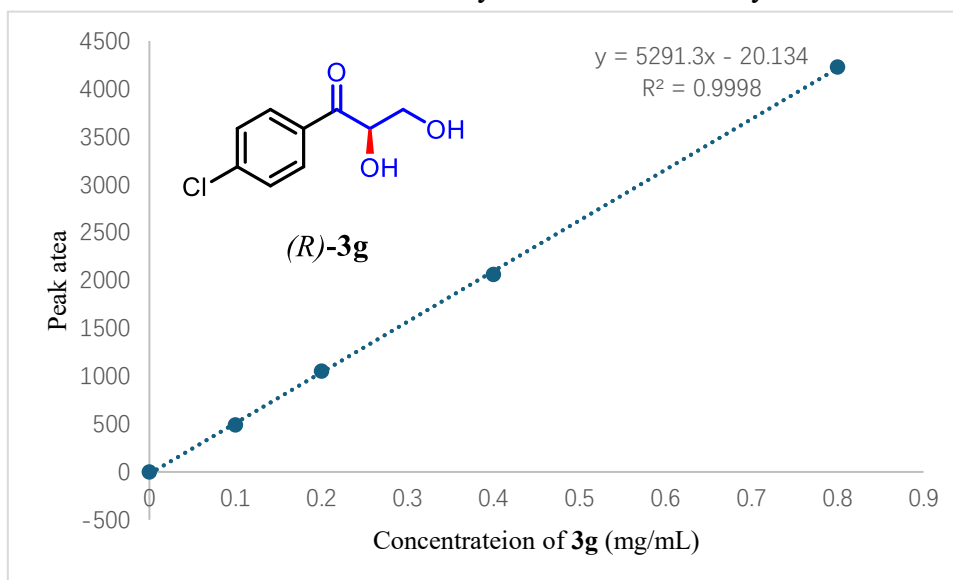

**Figure S12.** Calibration curve of **3g** used for yield determination by RP-HPLC.

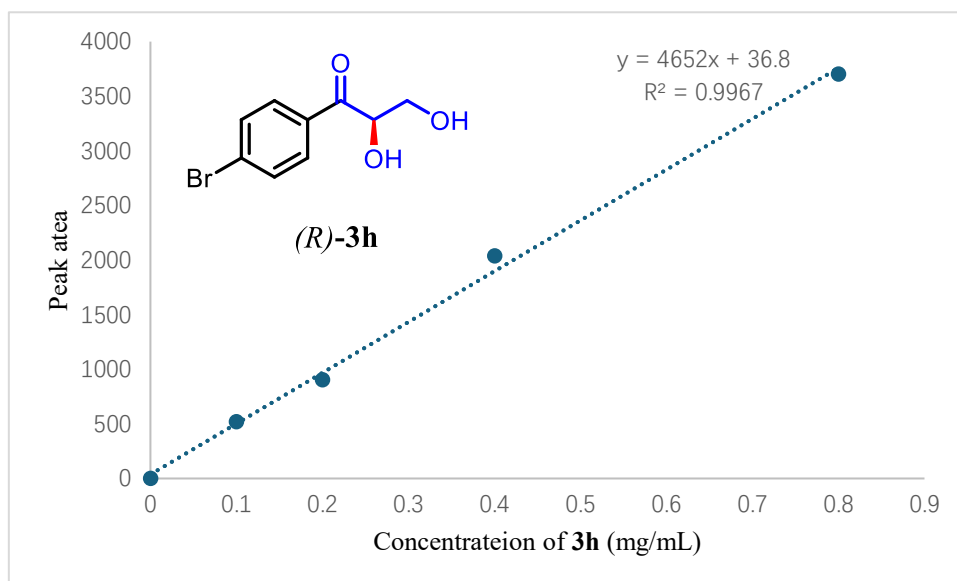

**Figure S13.** Calibration curve of **3h** used for yield determination by RP-HPLC.

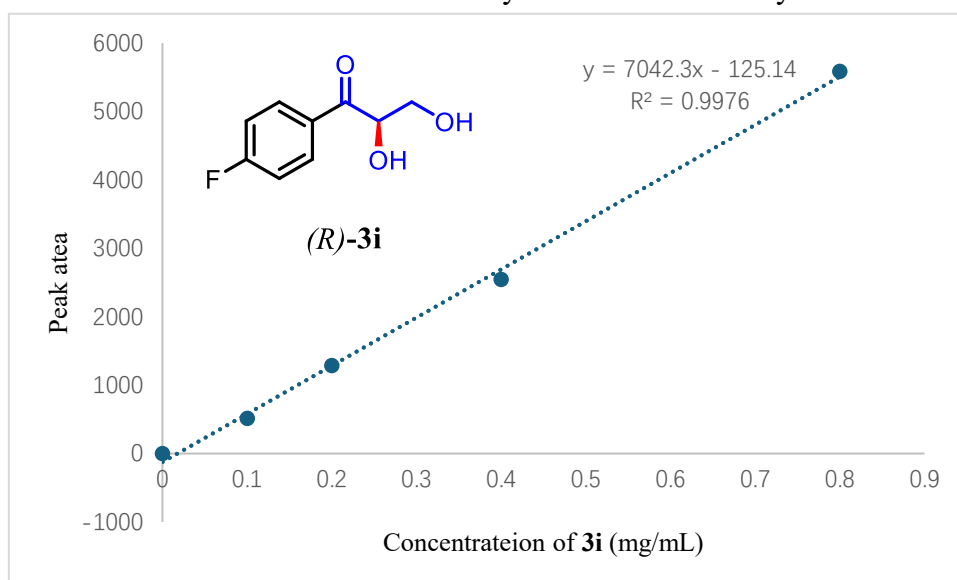

**Figure S14.** Calibration curve of **3i** used for yield determination by RP-HPLC.

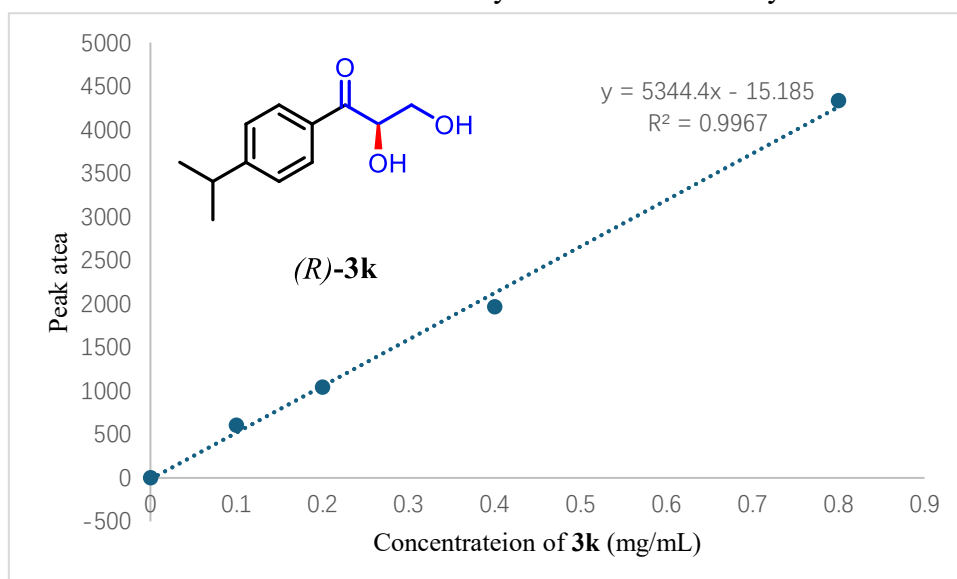

**Figure S15.** Calibration curve of **3k** used for yield determination by RP-HPLC.

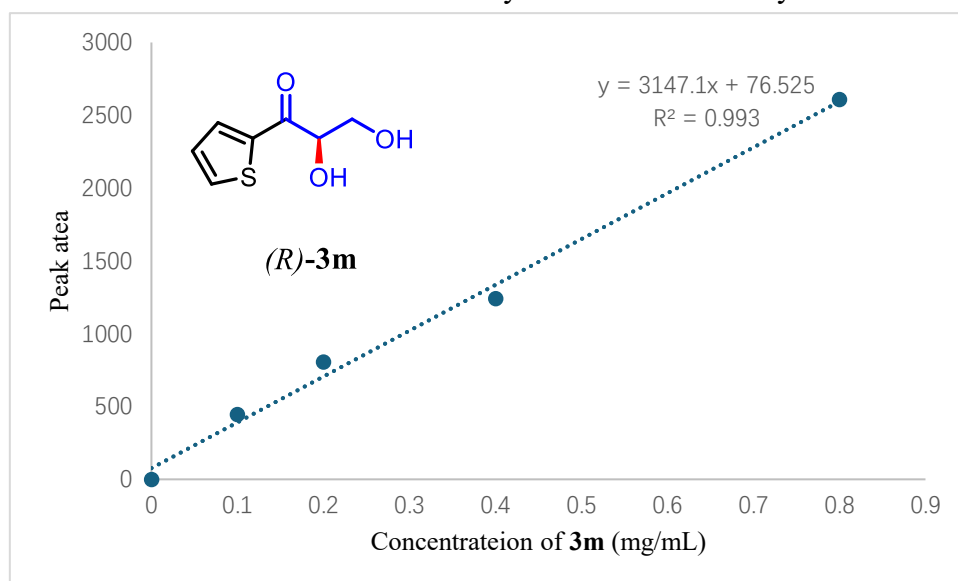

**Figure S16.** Calibration curve of **3m** used for yield determination by RP-HPLC.

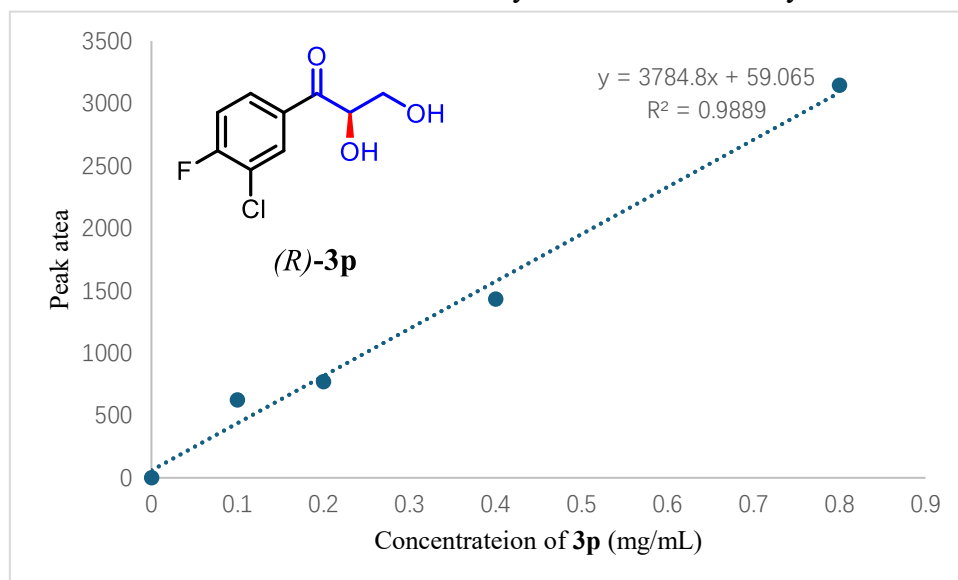

**Figure S17.** Calibration curve of **3p** used for yield determination by RP-HPLC.

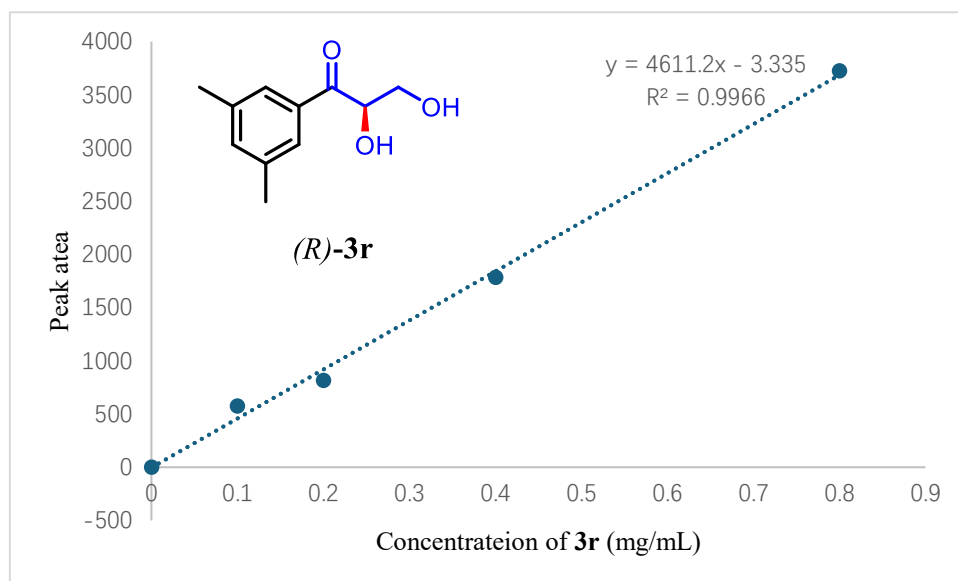

**Figure S18.** Calibration curve of **3r** used for yield determination by RP-HPLC.

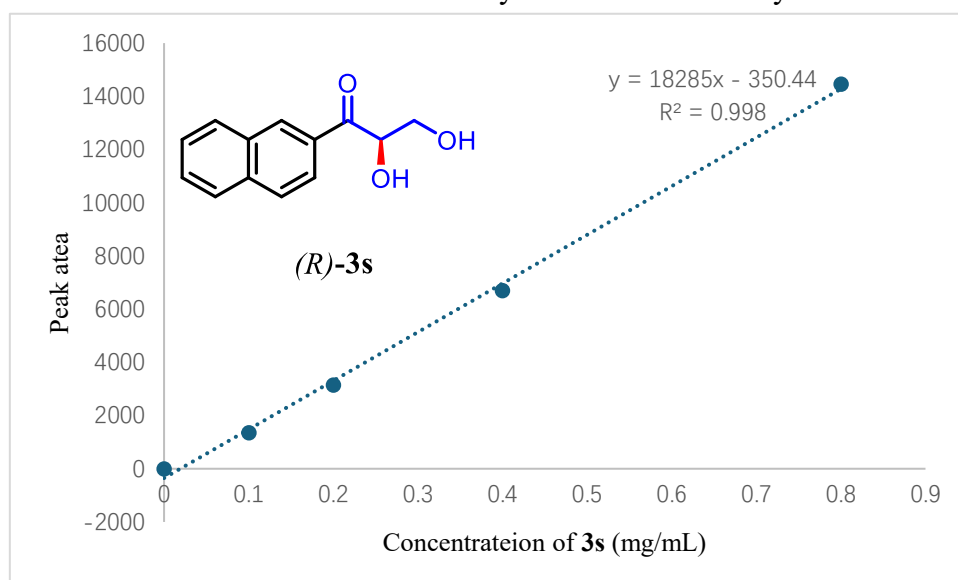

**Figure S19.** Calibration curve of **3s** used for yield determination by RP-HPLC.

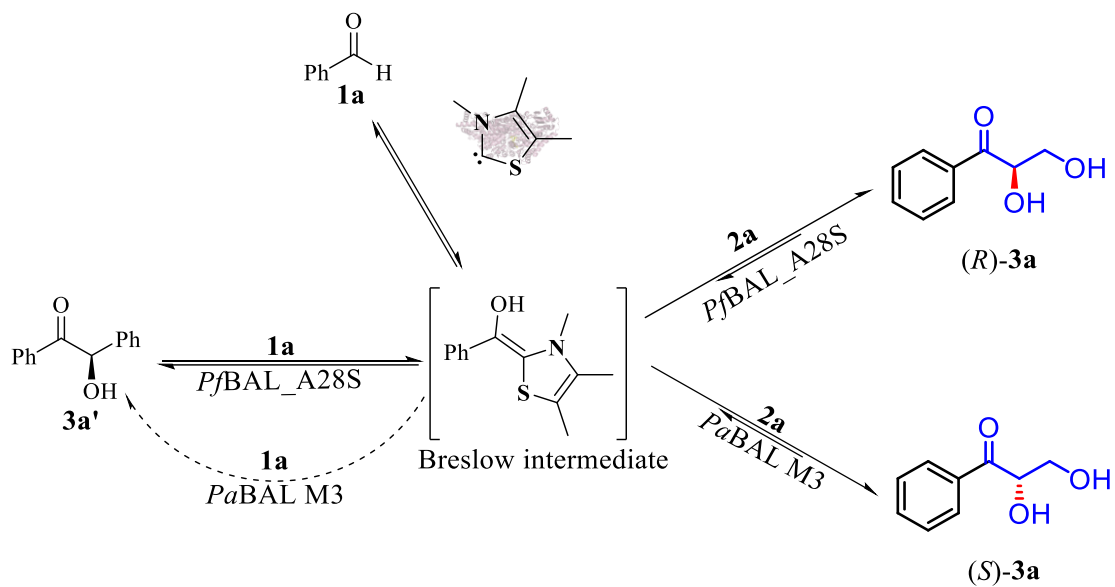

**Figure S20.** The reaction pathway.

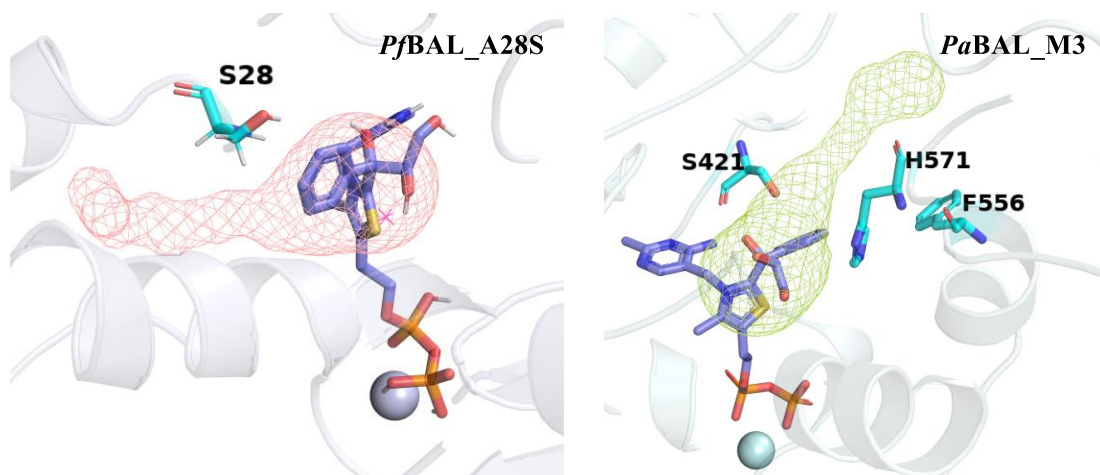

**Figure S21.** The substrate tunnel of *PfBAL\_A28S* and *PaBAL\_M3* respectively.

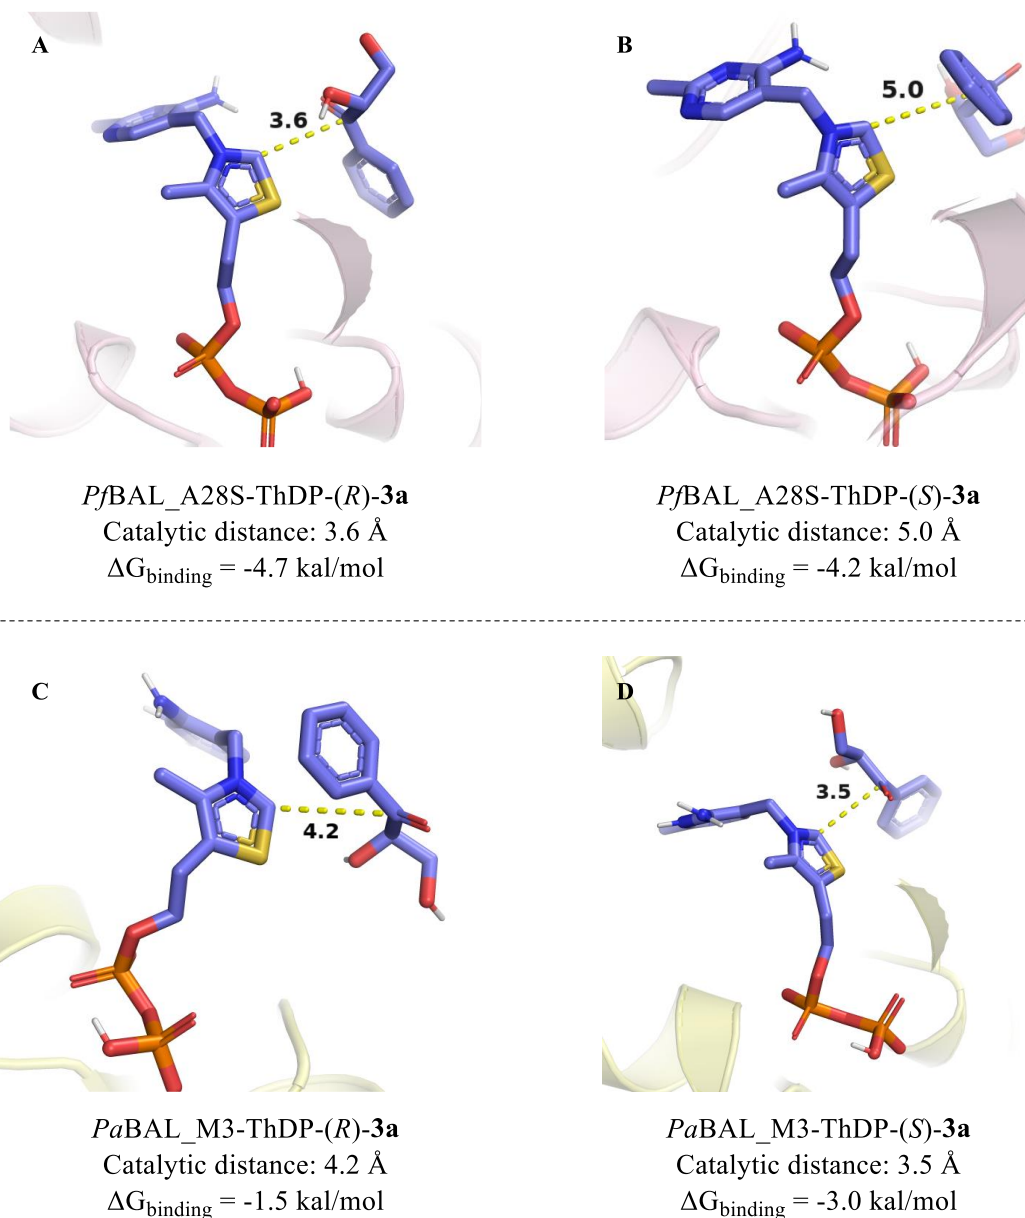

**Figure S22.** Molecular dockings of *PfBAL\_A28S*/*PaBAL\_M3* with (*R*)-**3a** or (*S*)-**3a** (ThDP and **3a** were presented in sticks; distances were showed in dashed lines). The reversible processes is demonstrated. To understand the different stereoselectivities of two enzyme pairs from the perspective of reverse reaction, molecular docking studies were performed for *PaBAL\_M3* and *PfBAL\_A28S* with both (*S*)- and (*R*)-enantiomers of **3a**, respectively. The docking results showed that the distance between the C2 of ThDP and carbonyl C of (*R*)-**3a** were 3.6 Å, clearly shorter than that of (*S*)-**3a** (5.0 Å). An opposite result was observed for *PaBAL\_M3* ( $d_{\text{ThDP-(R)-3a}} = 4.2 \text{ \AA} > d_{\text{ThDP-(S)-3a}} = 3.5 \text{ \AA}$ ). The large distance might prevent (*S*)-**3a** from being attacked by ThDP cofactor in *PfBAL\_A28S* and prevent (*R*)-**3a** from being attacked by ThDP cofactor in *PaBAL\_M3*. Therefore, *PfBAL\_A28S* just accepted (*R*)-**3a** as raw material, and *PaBAL\_M3* just accepted (*S*)-**3a** as raw material for the reverse reaction.

## 11. Supplementary Tables

**Table S1.** The information of different ThDP-dependent enzymes (existing this research group) used in this study

| Entry | enzyme | source                               | Protein identifier |
|-------|--------|--------------------------------------|--------------------|
| 1     | SsBAL  | <i>Streptomyces sp.</i> BK335        | WP_133047913.1     |
| 2     | SuBAL  | <i>Streptomyces umbrinus</i>         | WP_189844730.1     |
| 3     | AsBAL  | <i>Actinomadura sp.</i> KC345        | WP_131875833.1     |
| 4     | PaBAL  | <i>Polymorphobacter arshaanensis</i> | WP_135246357.1     |
| 5     | EcMend | <i>Escherichia coli</i> K-12         | 2JLC               |
| 6     | SsBFD  | <i>Streptomyces sp.</i> Tu 4128      | WP_122617744.1     |
| 7     | KdcA   | <i>Lactococcus lactis</i>            | 2VBF               |
| 8     | AnPDC  | <i>Acinetobacter nectaris</i>        | WP_023273611.1     |
| 9     | EcTK   | <i>Escherichia coli</i>              | 2R8P               |
| 10    | ScTK   | <i>S. cerevisiae</i> (yeast)         | 1TKA               |
| 11    | PfBAL  | <i>Pseudomonas fluorescens</i>       | 3D7K               |

**Table S2.** Primers used for 28 site of PfBAL

| Entry | Mutants | Forward Primer (5'-3')              | Reverse Primer (5'-3')           |
|-------|---------|-------------------------------------|----------------------------------|
| 1     | A28C    | tgtttggtcttcacggtTGTcacattgataccatc |                                  |
| 2     | A28D    | tgtttggtcttcacggtGATcacattgataccatc |                                  |
| 3     | A28E    | tgtttggtcttcacggtGAAcacattgataccatc |                                  |
| 4     | A28F    | tgtttggtcttcacggtTTTcacattgataccatc |                                  |
| 5     | A28G    | tgtttggtcttcacggtGGTcacattgataccatc |                                  |
| 6     | A28H    | tgtttggtcttcacggtCATcacattgataccatc |                                  |
| 7     | A28I    | tgtttggtcttcacggtATTcacattgataccatc |                                  |
| 8     | A28K    | tgtttggtcttcacggtAAAcacattgataccatc |                                  |
| 9     | A28L    | tgtttggtcttcacggtCTGcacattgataccatc |                                  |
| 10    | A28M    | tgtttggtcttcacggtATGcacattgataccatc | accgtgaagaccaaacagggtgctcgacgcct |
| 11    | A28N    | tgtttggtcttcacggtAATcacattgataccatc |                                  |
| 12    | A28P    | tgtttggtcttcacggtCCGcacattgataccatc |                                  |
| 13    | A28Q    | tgtttggtcttcacggtCAGcacattgataccatc |                                  |
| 14    | A28R    | tgtttggtcttcacggtCGTcacattgataccatc |                                  |
| 15    | A28S    | tgtttggtcttcacggtAGCcacattgataccatc |                                  |
| 16    | A28T    | tgtttggtcttcacggtACCcacattgataccatc |                                  |
| 17    | A28V    | tgtttggtcttcacggtGTTcacattgataccatc |                                  |
| 18    | A28W    | tgtttggtcttcacggtTGGcacattgataccatc |                                  |
| 19    | A28Y    | tgtttggtcttcacggtTATcacattgataccatc |                                  |

**Table S3.** Primers used for 112 site of *Pf*BAL

| Entry | Mutants | Forward Primer (5'-3')            | Reverse Primer (5'-3')         |
|-------|---------|-----------------------------------|--------------------------------|
| 1     | L112A   | tgatgagacaaataccGCACAagcgggcattga |                                |
| 2     | L112C   | tgatgagacaaataccTGTcaagcgggcattga |                                |
| 3     | L112D   | tgatgagacaaataccGATcaagcgggcattga |                                |
| 4     | L112E   | tgatgagacaaataccGAACAagcgggcattga |                                |
| 5     | L112F   | tgatgagacaaataccTTTcaagcgggcattga |                                |
| 6     | L112G   | tgatgagacaaataccGGTcaagcgggcattga |                                |
| 7     | L112H   | tgatgagacaaataccCATcaagcgggcattga |                                |
| 8     | L112I   | tgatgagacaaataccATTcaagcgggcattga |                                |
| 9     | L112K   | tgatgagacaaataccAAAcaagcgggcattga |                                |
| 10    | L112M   | tgatgagacaaataccATGcaagcgggcattga | ggattttgtctcatcatcacgcagagcggc |
| 11    | L112N   | tgatgagacaaataccAATcaagcgggcattga |                                |
| 12    | L112P   | tgatgagacaaataccCCGcaagcgggcattga |                                |
| 13    | L112Q   | tgatgagacaaataccCAGcaagcgggcattga |                                |
| 14    | L112R   | tgatgagacaaataccCGTcaagcgggcattga |                                |
| 15    | L112S   | tgatgagacaaataccAGCcaagcgggcattga |                                |
| 16    | L112T   | tgatgagacaaataccACCcaagcgggcattga |                                |
| 17    | L112V   | tgatgagacaaataccGTTcaagcgggcattga |                                |
| 18    | L112W   | tgatgagacaaataccTGGcaagcgggcattga |                                |
| 19    | L112Y   | tgatgagacaaataccTATcaagcgggcattga |                                |

**Table S4.** Primers used for 113 site of *Pf*BAL

| Entry | Mutants | Forward Primer (5'-3')            | Reverse Primer (5'-3')         |
|-------|---------|-----------------------------------|--------------------------------|
| 1     | Q113A   | gagacaaataccctcGCAgcgggcattgaccaa |                                |
| 2     | Q113C   | gagacaaataccctcTGTgcgggcattgaccaa |                                |
| 3     | Q113D   | gagacaaataccctcGATgcgggcattgaccaa |                                |
| 4     | Q113E   | gagacaaataccctcGAAgcgggcattgaccaa |                                |
| 5     | Q113F   | gagacaaataccctcTTTgcgggcattgaccaa |                                |
| 6     | Q113G   | gagacaaataccctcGGTgcgggcattgaccaa |                                |
| 7     | Q113H   | gagacaaataccctcCATgcgggcattgaccaa |                                |
| 8     | Q113I   | gagacaaataccctcATTgcgggcattgaccaa | ggattttgtctcatcatcacgcagagcggc |
| 9     | Q113K   | gagacaaataccctcAAAgcgggcattgaccaa |                                |
| 10    | Q113L   | gagacaaataccctcCTGgcgggcattgaccaa |                                |
| 11    | Q113M   | gagacaaataccctcATGgcgggcattgaccaa |                                |
| 12    | Q113N   | gagacaaataccctcAATgcgggcattgaccaa |                                |
| 13    | Q113P   | gagacaaataccctcCCGgcgggcattgaccaa |                                |
| 14    | Q113R   | gagacaaataccctcCGTgcgggcattgaccaa |                                |

|    |       |                                   |
|----|-------|-----------------------------------|
| 15 | Q113S | gagacaaataccctcAGCgcgggcattgaccaa |
| 16 | Q113T | gagacaaataccctcACCgcgggcattgaccaa |
| 17 | Q113V | gagacaaataccctcGTTgcgggcattgaccaa |
| 18 | Q113W | gagacaaataccctcTGGgcgggcattgaccaa |
| 19 | Q113Y | gagacaaataccctcTATgcgggcattgaccaa |

**Table S5.** The results of mutants at the amino acid residue L112 and Q113

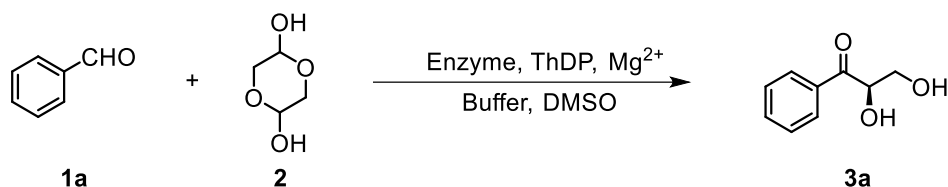

| Entry | enzyme | <b>1a</b> $\rightarrow$ <b>3a</b> |     | Entry | enzyme | <b>1a</b> $\rightarrow$ <b>3a</b> |     |
|-------|--------|-----------------------------------|-----|-------|--------|-----------------------------------|-----|
|       |        | yield                             | ee. |       |        | yield                             | ee. |
| 1     | L112A  | 0                                 | -   | 1     | Q113A  | 0                                 | -   |
| 2     | L112C  | 11%                               | 91% | 2     | Q113C  | 0                                 | -   |
| 3     | L112D  | 0                                 | -   | 3     | Q113D  | 0                                 | -   |
| 4     | L112E  | 0                                 | -   | 4     | Q113E  | 0                                 | -   |
| 5     | L112F  | 12%                               | 85% | 5     | Q113F  | 0                                 | -   |
| 6     | L112G  | 0                                 | -   | 6     | Q113G  | 0                                 | -   |
| 7     | L112H  | 0                                 | -   | 7     | Q113H  | 0                                 | -   |
| 8     | L112I  | 31%                               | 88% | 8     | Q113I  | 0                                 | -   |
| 9     | L112K  | 0                                 | -   | 9     | Q113K  | 0                                 | -   |
| 10    | L112M  | 6%                                | 93% | 10    | Q113L  | 0                                 | -   |
| 11    | L112N  | 24%                               | 89% | 11    | Q113M  | 0                                 | -   |
| 12    | L112P  | 0                                 | -   | 12    | Q113N  | 0                                 | -   |
| 13    | L112Q  | 0                                 | -   | 13    | Q113P  | 0                                 | -   |
| 14    | L112R  | 0                                 | -   | 14    | Q113R  | trace                             | -   |
| 15    | L112S  | 9%                                | 78% | 15    | Q113S  | 0                                 | -   |
| 16    | L112T  | trace                             | -   | 16    | Q113T  | 0                                 | -   |
| 17    | L112V  | 9%                                | 90% | 17    | Q113V  | 0                                 | -   |
| 18    | L112W  | 0                                 | -   | 18    | Q113W  | 0                                 | -   |
| 19    | L112Y  | 0                                 | -   | 19    | Q113Y  | 0                                 | -   |

Reaction conditions: **1a** (0.04 mmol, 100 mM), **2** (0.04 mmol, 100 mM), whole cell (400  $\mu$ L, 60 mg/mL), ThDP (0.15 mM),  $\text{MgSO}_4$  (2.5 mM), PBS buffer (50 mM, pH 8.0), DMSO (5%, v/v), 1000 rpm, 30  $^\circ\text{C}$ , 24 h; Yields and ee were determined by HPLC.

**Table S6.** Primers used for 116 site of *PaBAL*

| Entry | Mutants | Forward Primer (5'-3')              | Reverse Primer (5'-3')           |
|-------|---------|-------------------------------------|----------------------------------|
| 1     | L116A   | agttgaacaaatccgGCAcagggcggtattgatca |                                  |
| 2     | L116C   | agttgaacaaatccgTGTcagggcggtattgatca |                                  |
| 3     | L116D   | agttgaacaaatccgGATcagggcggtattgatca |                                  |
| 4     | L116E   | agttgaacaaatccgGAACagggcggtattgatca |                                  |
| 5     | L116F   | agttgaacaaatccgTTTcagggcggtattgatca |                                  |
| 6     | L116G   | agttgaacaaatccgGGTcagggcggtattgatca |                                  |
| 7     | L116H   | agttgaacaaatccgCATcagggcggtattgatca |                                  |
| 8     | L116I   | agttgaacaaatccgATTcagggcggtattgatca |                                  |
| 9     | L116K   | AgttgaacaaatccgAAAcagggcggtattgatca |                                  |
| 10    | L116M   | AgttgaacaaatccgATGcagggcggtattgatca | cggattgtttcaacttctcagagggcgggcgc |
| 11    | L116N   | agttgaacaaatccgAATcagggcggtattgatca |                                  |
| 12    | L116P   | agttgaacaaatccgCCGcagggcggtattgatca |                                  |
| 13    | L116Q   | agttgaacaaatccgCAGcagggcggtattgatca |                                  |
| 14    | L116R   | agttgaacaaatccgCGTcagggcggtattgatca |                                  |
| 15    | L116S   | agttgaacaaatccgAGCcagggcggtattgatca |                                  |
| 16    | L116T   | agttgaacaaatccgACCcagggcggtattgatca |                                  |
| 17    | L116V   | agttgaacaaatccgGTTcagggcggtattgatca |                                  |
| 18    | L116W   | agttgaacaaatccgTGGcagggcggtattgatca |                                  |
| 19    | L116Y   | agttgaacaaatccgTATcagggcggtattgatca |                                  |

**Table S7.** Primers used for 117 site of *PaBAL*

| Entry | Mutants | Forward Primer (5'-3')              | Reverse Primer (5'-3')            |
|-------|---------|-------------------------------------|-----------------------------------|
| 1     | Q117A   | gttgaacaaatccgctgGCAggcggtattgatcag |                                   |
| 2     | Q117C   | gttgaacaaatccgctgTGTggcggtattgatcag |                                   |
| 3     | Q117D   | gttgaacaaatccgctgGATggcggtattgatcag |                                   |
| 4     | Q117E   | gttgaacaaatccgctgGAAggcggtattgatcag |                                   |
| 5     | Q117F   | gttgaacaaatccgctgTTTggcggtattgatcag |                                   |
| 6     | Q117G   | gttgaacaaatccgctgGGTggcggtattgatcag |                                   |
| 7     | Q117H   | gttgaacaaatccgctgCATggcggtattgatcag |                                   |
| 8     | Q117I   | gttgaacaaatccgctgATTggcggtattgatcag | cagcggattgtttcaacttctcagagggcgggc |
| 9     | Q117K   | gttgaacaaatccgctgAAAgcggtattgatcag  |                                   |
| 10    | Q117L   | gttgaacaaatccgctgCTGggcggtattgatcag |                                   |
| 11    | Q117M   | gttgaacaaatccgctgATGggcggtattgatcag |                                   |
| 12    | Q117N   | gttgaacaaatccgctgAATggcggtattgatcag |                                   |
| 13    | Q117P   | gttgaacaaatccgctgCCGggcggtattgatcag |                                   |
| 14    | Q117R   | gttgaacaaatccgctgCGTggcggtattgatcag |                                   |

|    |       |                                     |
|----|-------|-------------------------------------|
| 15 | Q117S | gttgaacaaatccgctgAGCggcggtattgatcag |
| 16 | Q117T | gttgaacaaatccgctgACCggcggtattgatcag |
| 17 | Q117V | gttgaacaaatccgctgGTTggcggtattgatcag |
| 18 | Q117W | gttgaacaaatccgctgTGGggcggtattgatcag |
| 19 | Q117Y | gttgaacaaatccgctgTATggcggtattgatcag |

**Table S8.** Primers used for 396 site of *PaBAL*

| Entry | Mutants | Forward Primer (5'-3')               | Reverse Primer (5'-3')            |
|-------|---------|--------------------------------------|-----------------------------------|
| 1     | G396A   | ttatgtgtttgatggcGCAgaaagcagtagctgggg |                                   |
| 2     | G396C   | ttatgtgtttgatggcTGTgaaagcagtagctgggg |                                   |
| 3     | G396D   | ttatgtgtttgatggcGATgaaagcagtagctgggg |                                   |
| 4     | G396E   | ttatgtgtttgatggcGAAgaaagcagtagctgggg |                                   |
| 5     | G396F   | ttatgtgtttgatggcTTTgaaagcagtagctgggg |                                   |
| 6     | G396H   | ttatgtgtttgatggcCATgaaagcagtagctgggg |                                   |
| 7     | G396I   | ttatgtgtttgatggcATTgaaagcagtagctgggg |                                   |
| 8     | G396K   | ttatgtgtttgatggcAAAgaaagcagtagctgggg |                                   |
| 9     | G396L   | ttatgtgtttgatggcCTGgaaagcagtagctgggg |                                   |
| 10    | G396M   | ttatgtgtttgatggcATGgaaagcagtagctgggg | gccatcaaacacataagcagcatcctgaccggc |
| 11    | G396N   | ttatgtgtttgatggcAATgaaagcagtagctgggg |                                   |
| 12    | G396P   | ttatgtgtttgatggcCCGgaaagcagtagctgggg |                                   |
| 13    | G396Q   | ttatgtgtttgatggcCAGgaaagcagtagctgggg |                                   |
| 14    | G396R   | ttatgtgtttgatggcCGTgaaagcagtagctgggg |                                   |
| 15    | G396S   | ttatgtgtttgatggcAGCgaaagcagtagctgggg |                                   |
| 16    | G396T   | ttatgtgtttgatggcACCgaaagcagtagctgggg |                                   |
| 17    | G396V   | ttatgtgtttgatggcGTTgaaagcagtagctgggg |                                   |
| 18    | G396W   | ttatgtgtttgatggcTGGgaaagcagtagctgggg |                                   |
| 19    | G396Y   | ttatgtgtttgatggcTATgaaagcagtagctgggg |                                   |

**Table S9.** Primers used for 417 site of *PaBAL*

| Entry | Mutants | Forward Primer (5'-3')              | Reverse Primer (5'-3')           |
|-------|---------|-------------------------------------|----------------------------------|
| 1     | H417A   | cctgcaagagtctgagtGCAggttatctgggctgc |                                  |
| 2     | H417C   | cctgcaagagtctgagtTGTggttatctgggctgc |                                  |
| 3     | H417D   | cctgcaagagtctgagtGATggttatctgggctgc |                                  |
| 4     | H417E   | cctgcaagagtctgagtGAAggttatctgggctgc |                                  |
| 5     | H417F   | cctgcaagagtctgagtTTTggttatctgggctgc | actcagaactctgcaggtgcatccactgccac |
| 6     | H417G   | cctgcaagagtctgagtGGTggttatctgggctgc |                                  |
| 7     | H417I   | cctgcaagagtctgagtATTggttatctgggctgc |                                  |
| 8     | H417K   | cctgcaagagtctgagtAAAggttatctgggctgc |                                  |
| 9     | H417L   | cctgcaagagtctgagtCTGggttatctgggctgc |                                  |

|    |       |                                     |
|----|-------|-------------------------------------|
| 10 | H417M | cctgcaagagtctgagtATGggttatctgggctgc |
| 11 | H417N | cctgcaagagtctgagtAATggttatctgggctgc |
| 12 | H417P | cctgcaagagtctgagtCCGggttatctgggctgc |
| 13 | H417Q | cctgcaagagtctgagtCATggttatctgggctgc |
| 14 | H417R | cctgcaagagtctgagtCGTggttatctgggctgc |
| 15 | H417S | cctgcaagagtctgagtAGCggttatctgggctgc |
| 16 | H417T | cctgcaagagtctgagtACCggttatctgggctgc |
| 17 | H417V | cctgcaagagtctgagtGTTggttatctgggctgc |
| 18 | H417W | cctgcaagagtctgagtTGGggttatctgggctgc |
| 19 | H417Y | cctgcaagagtctgagtTATggttatctgggctgc |

**Table S10.** Primers used for 421 site of *PaBAL*

| Entry | Mutants | Forward Primer (5'-3')               | Reverse Primer (5'-3')           |
|-------|---------|--------------------------------------|----------------------------------|
| 1     | G421A   | gagtcatggttatctgGCAtgcctgggcattggtcc |                                  |
| 2     | G421C   | gagtcatggttatctgTGTgcctgggcattggtcc  |                                  |
| 3     | G421D   | gagtcatggttatctgGATgcctgggcattggtcc  |                                  |
| 4     | G421E   | gagtcatggttatctgGAAtgcctgggcattggtcc |                                  |
| 5     | G421F   | gagtcatggttatctgTTTgcctgggcattggtcc  |                                  |
| 6     | G421H   | gagtcatggttatctgCATgcctgggcattggtcc  |                                  |
| 7     | G421I   | gagtcatggttatctgATTgcctgggcattggtcc  |                                  |
| 8     | G421K   | gagtcatggttatctgAAAtgcctgggcattggtcc |                                  |
| 9     | G421L   | gagtcatggttatctgCTGtcctgggcattggtcc  |                                  |
| 10    | G421M   | gagtcatggttatctgATGtcctgggcattggtcc  | cagataaccatgactcagaactctgcaggtgc |
| 11    | G421N   | gagtcatggttatctgAATgcctgggcattggtcc  |                                  |
| 12    | G421P   | gagtcatggttatctgCCGtcctgggcattggtcc  |                                  |
| 13    | G421Q   | gagtcatggttatctgCATgcctgggcattggtcc  |                                  |
| 14    | G421R   | gagtcatggttatctgCGTgcctgggcattggtcc  |                                  |
| 15    | G421S   | gagtcatggttatctgAGCtcctgggcattggtcc  |                                  |
| 16    | G421T   | gagtcatggttatctgACCTgcctgggcattggtcc |                                  |
| 17    | G421V   | gagtcatggttatctgGTTgcctgggcattggtcc  |                                  |
| 18    | G421W   | gagtcatggttatctgTGGtcctgggcattggtcc  |                                  |
| 19    | G421Y   | gagtcatggttatctgTATgcctgggcattggtcc  |                                  |

**Table S11.** Primers used for 480 site of *PaBAL*

| Entry | Mutants | Forward Primer (5'-3')              | Reverse Primer (5'-3')         |
|-------|---------|-------------------------------------|--------------------------------|
| 1     | M480A   | ataatcaggtgtggggcGCAagtattcatggccag |                                |
| 2     | M480C   | ataatcaggtgtggggcTGTagtattcatggccag | gccccacacctgattattcagaatcacggt |
| 3     | M480D   | ataatcaggtgtggggcGATagtattcatggccag |                                |
| 4     | M480E   | ataatcaggtgtggggcGAAagtattcatggccag |                                |

|    |       |                      |                 |
|----|-------|----------------------|-----------------|
| 5  | M480F | ataatcaggtgtggggcTTT | agtattcatggccag |
| 6  | M480G | ataatcaggtgtggggcGGT | agtattcatggccag |
| 7  | M480H | ataatcaggtgtggggcCAT | agtattcatggccag |
| 8  | M480I | ataatcaggtgtggggcATT | agtattcatggccag |
| 9  | M480K | ataatcaggtgtggggcAAA | agtattcatggccag |
| 10 | M480L | ataatcaggtgtggggcCTG | agtattcatggccag |
| 11 | M480N | ataatcaggtgtggggcAAT | agtattcatggccag |
| 12 | M480P | ataatcaggtgtggggcCCG | agtattcatggccag |
| 13 | M480Q | ataatcaggtgtggggcCAG | agtattcatggccag |
| 14 | M480R | ataatcaggtgtggggcCGT | agtattcatggccag |
| 15 | M480S | ataatcaggtgtggggcAGC | agtattcatggccag |
| 16 | M480T | ataatcaggtgtggggcACC | agtattcatggccag |
| 17 | M480V | ataatcaggtgtggggcGTT | agtattcatggccag |
| 18 | M480W | ataatcaggtgtggggcTGG | agtattcatggccag |
| 19 | M480Y | ataatcaggtgtggggcTAT | agtattcatggccag |

**Table S12.** Primers used for 556 site of *PaBAL*

| Entry | Mutants | Forward Primer (5'-3') | Reverse Primer (5'-3') |
|-------|---------|------------------------|------------------------|
| 1     | M556A   | atccggccaccgttgcaGCA   | ctgggtcaattag          |
| 2     | M556C   | atccggccaccgttgcaTGT   | ctgggtcaattag          |
| 3     | M556D   | atccggccaccgttgcaGAT   | ctgggtcaattag          |
| 4     | M556E   | atccggccaccgttgcaGAA   | ctgggtcaattag          |
| 5     | M556F   | atccggccaccgttgcaTTT   | ctgggtcaattag          |
| 6     | M556G   | atccggccaccgttgcaGGT   | ctgggtcaattag          |
| 7     | M556H   | atccggccaccgttgcaCAT   | ctgggtcaattag          |
| 8     | M556I   | atccggccaccgttgcaATT   | ctgggtcaattag          |
| 9     | M556K   | atccggccaccgttgcaAAA   | ctgggtcaattag          |
| 10    | M556L   | atccggccaccgttgcaCTG   | ctgggtcaattag          |
| 11    | M556N   | atccggccaccgttgcaAAT   | ctgggtcaattag          |
| 12    | M556P   | atccggccaccgttgcaCCG   | ctgggtcaattag          |
| 13    | M556Q   | atccggccaccgttgcaCAG   | ctgggtcaattag          |
| 14    | M556R   | atccggccaccgttgcaCGT   | ctgggtcaattag          |
| 15    | M556S   | atccggccaccgttgcaAGC   | ctgggtcaattag          |
| 16    | M556T   | atccggccaccgttgcaACC   | ctgggtcaattag          |
| 17    | M556V   | atccggccaccgttgcaGTT   | ctgggtcaattag          |
| 18    | M556W   | atccggccaccgttgcaTGG   | ctgggtcaattag          |
| 19    | M556Y   | atccggccaccgttgcaTAT   | ctgggtcaattag          |

tgcaacggtggccgatgaacaacatcgg

**Table S13.** Primers used for 571 site of *PaBAL*

| Entry | Mutants | Forward Primer (5'-3')              | Reverse Primer (5'-3')           |
|-------|---------|-------------------------------------|----------------------------------|
| 1     | Y571A   | gccgtgatattatgattccgGCAtacgagaacatc |                                  |
| 2     | Y571C   | gccgtgatattatgattccgTGTtacgagaacatc |                                  |
| 3     | Y571D   | gccgtgatattatgattccgGATtacgagaacatc |                                  |
| 4     | Y571E   | gccgtgatattatgattccgGAAtacgagaacatc |                                  |
| 5     | Y571F   | gccgtgatattatgattccgTTTtacgagaacatc |                                  |
| 6     | Y571G   | gccgtgatattatgattccgGGTtacgagaacatc |                                  |
| 7     | Y571H   | gccgtgatattatgattccgCATtacgagaacatc |                                  |
| 8     | Y571I   | gccgtgatattatgattccgATTtacgagaacatc |                                  |
| 9     | Y571K   | gccgtgatattatgattccgAAAtacgagaacatc |                                  |
| 10    | Y571L   | gccgtgatattatgattccgCTGTacgagaacatc | cggaatcataatatcacggctaccttcggcta |
| 11    | Y571M   | gccgtgatattatgattccgATGTacgagaacatc |                                  |
| 12    | Y571N   | gccgtgatattatgattccgAATtacgagaacatc |                                  |
| 13    | Y571P   | gccgtgatattatgattccgCCGTacgagaacatc |                                  |
| 14    | Y571Q   | gccgtgatattatgattccgCAGtacgagaacatc |                                  |
| 15    | Y571R   | gccgtgatattatgattccgCGTtacgagaacatc |                                  |
| 16    | Y571S   | gccgtgatattatgattccgAGCtacgagaacatc |                                  |
| 17    | Y571T   | gccgtgatattatgattccgACCTacgagaacatc |                                  |
| 18    | Y571V   | gccgtgatattatgattccgGTTtacgagaacatc |                                  |
| 19    | Y571W   | gccgtgatattatgattccgTGGtacgagaacatc |                                  |

**Table S14.** Primers used for mutants G421S\_H417 of *PaBAL*

| Entry | Mutants     | Forward Primer (5'-3')           | Reverse Primer (5'-3')           |
|-------|-------------|----------------------------------|----------------------------------|
| 1     | H417A_G421S | aagagttctgagtGCAggttatctgAGCtgcc |                                  |
| 2     | H417C_G421S | aagagttctgagtTGTggttatctgAGCtgcc |                                  |
| 3     | H417D_G421S | aagagttctgagtGATggttatctgAGCtgcc |                                  |
| 4     | H417E_G421S | aagagttctgagtGAAggttatctgAGCtgcc |                                  |
| 5     | H417F_G421S | aagagttctgagtTTTggttatctgAGCtgcc |                                  |
| 6     | H417G_G421S | aagagttctgagtGGTggttatctgAGCtgcc |                                  |
| 7     | H417I_G421S | aagagttctgagtATTggttatctgAGCtgcc |                                  |
| 8     | H417K_G421S | aagagttctgagtAAAggttatctgAGCtgcc | actcagaactcttcaggtgcatccactgccac |
| 9     | H417L_G421S | aagagttctgagtCTGggttatctgAGCtgcc |                                  |
| 10    | H417M_G421S | aagagttctgagtATGggttatctgAGCtgcc |                                  |
| 11    | H417N_G421S | aagagttctgagtAATggttatctgAGCtgcc |                                  |
| 12    | H417P_G421S | aagagttctgagtCCGggttatctgAGCtgcc |                                  |
| 13    | H417Q_G421S | aagagttctgagtCAGggttatctgAGCtgcc |                                  |
| 14    | H417R_G421S | aagagttctgagtCGTggttatctgAGCtgcc |                                  |

|    |             |                                  |
|----|-------------|----------------------------------|
| 15 | H417S_G421S | aagagttctgagtAGCggttatctgAGCtgcc |
| 16 | H417T_G421S | aagagttctgagtACCggttatctgAGCtgcc |
| 17 | H417V_G421S | aagagttctgagtGTTggttatctgAGCtgcc |
| 18 | H417W_G421S | aagagttctgagtTGGggttatctgAGCtgcc |
| 19 | H417Y_G421S | aagagttctgagtTATggttatctgAGCtgcc |

**Table S15.** Crystal data and structure refinement for (*R*)-**3g**

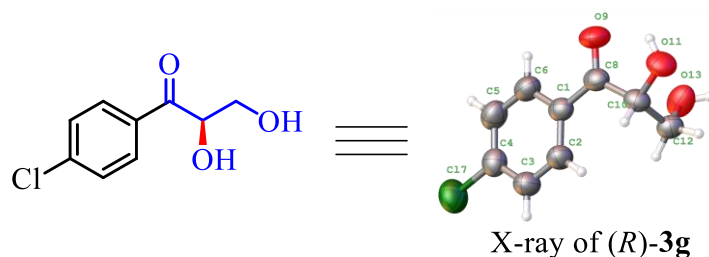

|                                    |                                                               |
|------------------------------------|---------------------------------------------------------------|
| CCDC number                        | 2494126                                                       |
| Empirical formula                  | C <sub>9</sub> H <sub>9</sub> ClO <sub>3</sub>                |
| Formula weight                     | 200.61                                                        |
| Temperature/K                      | 273.15                                                        |
| Crystal system                     | monoclinic                                                    |
| Space group                        | P2 <sub>1</sub>                                               |
| a/Å                                | 4.8781(3)                                                     |
| b/Å                                | 5.6405(3)                                                     |
| c/Å                                | 16.7996(9)                                                    |
| α/°                                | 90                                                            |
| β/°                                | 94.538(2)                                                     |
| γ/°                                | 90                                                            |
| Volume/Å <sup>3</sup>              | 460.79(4)                                                     |
| Z                                  | 2                                                             |
| ρ <sub>calc</sub> /cm <sup>3</sup> | 1.446                                                         |
| μ/mm <sup>-1</sup>                 | 3.458                                                         |
| F(000)                             | 208.0                                                         |
| Crystal size/mm <sup>3</sup>       | 0.58 × 0.36 × 0.01                                            |
| Radiation                          | CuKα (λ = 1.54178)                                            |
| 2θ range for data collection/°     | 5.276 to 136.922                                              |
| Index ranges                       | -5 ≤ h ≤ 5, -6 ≤ k ≤ 6, -19 ≤ l ≤ 19                          |
| Reflections collected              | 7841                                                          |
| Independent reflections            | 1555 [R <sub>int</sub> = 0.0414, R <sub>sigma</sub> = 0.0410] |
| Data/restraints/parameters         | 1555/1/121                                                    |
| Goodness-of-fit on F <sup>2</sup>  | 1.109                                                         |
| Final R indexes [I >= 2σ (I)]      | R <sub>1</sub> = 0.0415, wR <sub>2</sub> = 0.1086             |

|                                                |                                  |
|------------------------------------------------|----------------------------------|
| Final R indexes [all data]                     | $R_1 = 0.0425$ , $wR_2 = 0.1096$ |
| Largest diff. peak/hole / $e \text{ \AA}^{-3}$ | 0.22/-0.18                       |
| Flack parameter                                | 0.120(11)                        |

## 12. Substrate Scope of Aliphatic Aldehydes

The reaction mixture contains substrate **1** (0.01 mmol), **2** (0.01 mmol), DMSO (5%, v/v), ThDP (0.15 mM),  $\text{MgSO}_4$  (2.5 mM) and PBS (50 mM, pH 8.0, 0.4 mL) supplemented with 200 mg/mL whole cell of *PfBAL\_A28S*. And the reactions were shaken at 1000 rpm, 30 °C for 24 h on the dry thermostat metal bath JX-10. Then 1 mL EtOAc was added to the reaction extracted the products by centrifugation at 12,000 rpm for 1 min. The product was concentrated by the rotary evaporator and added 0.5 mL MeOH. Product identification by TLC and HRMS.

**Table S16.** The results of evaluation on substrate scope of aliphatic aldehydes

| Aliphatic aldehyde                                                                                                                                                                                                                      | Product                                                                                          | <i>PfBAL_A28S</i> (yield) | <i>PaBAL M3</i> (yield) |
|-----------------------------------------------------------------------------------------------------------------------------------------------------------------------------------------------------------------------------------------|--------------------------------------------------------------------------------------------------|---------------------------|-------------------------|
| 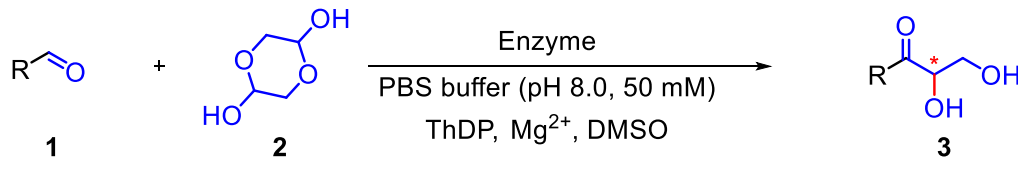<br>$\text{R-CHO} + \text{ThDP} \xrightarrow[\text{ThDP, Mg}^{2+}, \text{DMSO}]{\text{Enzyme, PBS buffer (pH 8.0, 50 mM)}} \text{R-CH(OH)-CH(OH)-OH}$ |                                                                                                  |                           |                         |
| <br><b>1t</b>                                                                                                                                        | <br><b>3t</b> | -                         | -                       |
| <br><b>1u</b>                                                                                                                                        | <br><b>3u</b> | -                         | -                       |
| <br><b>1v</b>                                                                                                                                        | <br><b>3v</b> | -                         | -                       |
| <br><b>1w</b>                                                                                                                                        | <br><b>3w</b> | trace                     | -                       |
| <br><b>1x</b>                                                                                                                                        | <br><b>3x</b> | trace                     | -                       |
| <br><b>1y</b>                                                                                                                                        | <br><b>3y</b> | trace                     | -                       |
| <br><b>1z</b>                                                                                                                                        | <br><b>3z</b> | trace                     | -                       |

4#1022 RT: 3.08 AV: 1 NL: 8.13E6  
T: FTMS - p ESI Full ms [50 0000-750 0000]

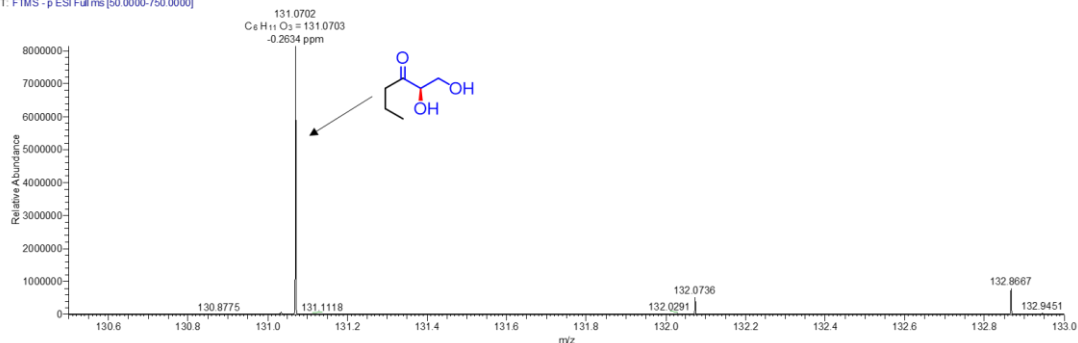

HRMS (ESI, m/z): calcd for  $C_6H_{11}O_3$  [M-H]<sup>-</sup>: 131.0703, found: 131.0702.

HRMS of **3w**

7#944 RT: 2.85 AV: 1 NL: 2.01E6  
T: FTMS + p ESI Full ms [50 0000-750 0000]

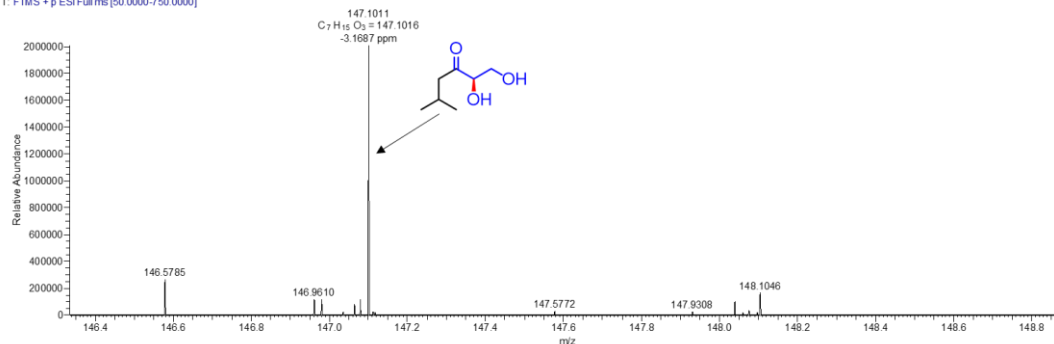

HRMS (ESI, m/z): calcd for  $C_7H_{15}O_3$  [M+H]<sup>+</sup>: 147.1016, found: 147.1011.

HRMS of **3x**

5#968 RT: 2.92 AV: 1 NL: 3.95E6  
T: FTMS + p ESI Full ms [50 0000-750 0000]

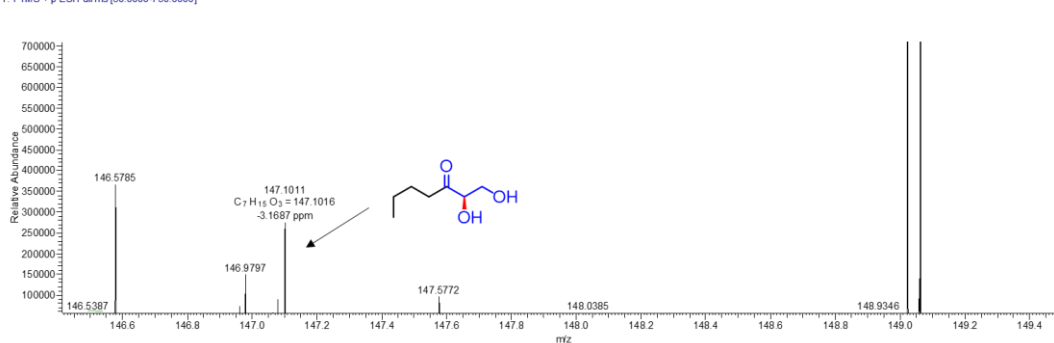

HRMS (ESI, m/z): calcd for  $C_7H_{15}O_3$  [M+H]<sup>+</sup>: 147.1016, found: 147.1011.

HRMS of **3y**

6#1256 RT: 3.79 AV: 1 NL: 6.07E6  
T: FTMS + p ESI Full ms [50 0000-750 0000]

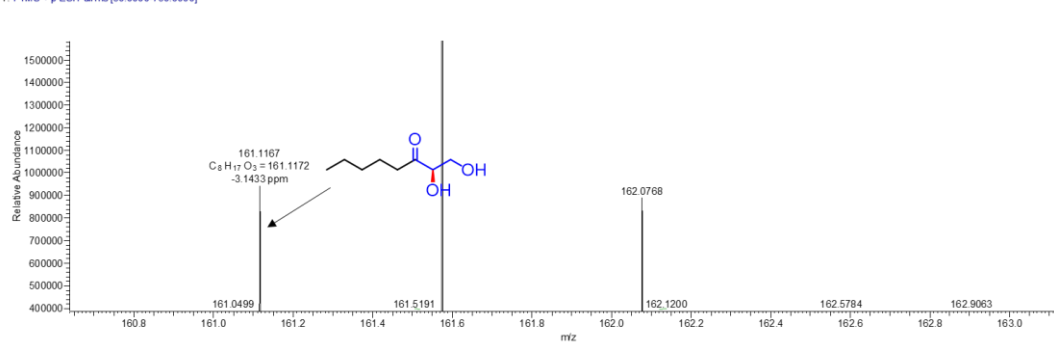

HRMS (ESI, m/z): calcd for  $C_8H_{17}O_3$  [M+H]<sup>+</sup>: 161.1172, found: 161.1167.

HRMS of **3z**

### 13. The higher substrate concentrations of **1c** and **2** for *PfBAL\_A28S*

Different concentrations of **1c** or **2** (final concentrations: 200 mM, 300 mM, 400 mM, 500 mM, 600 mM and 800 mM) were added to the reaction. The reaction mixture also contains DMSO (5%, v/v), ThDP (0.15 mM), MgSO<sub>4</sub> (2.5 mM) and PBS (50 mM, pH 8.0, 0.4 mL) supplemented with 60 mg/mL whole cell of *PfBAL\_A28S*. And the reactions were shaken at 1000 rpm, 30 °C for 24 h on the dry thermostat metal bath JX-10. Then 1mL EtOAc was added to the reaction (three times) and extracted the products by centrifugation at 12,000 rpm for 1 min. The product was concentrated by the rotary evaporator and added 0.5 mL EtOAc containing 1,3,5-trimethoxybenzene (0.5 equiv.) as internal standard. The yields were determined by <sup>1</sup>H NMR and ee were determined by HPLC.

A 40 mL-scale preparative reaction consisted of substrate **1c** (500 mM) and **2** (500 mM) also was conducted, the procedure of products was similar to that as described above.

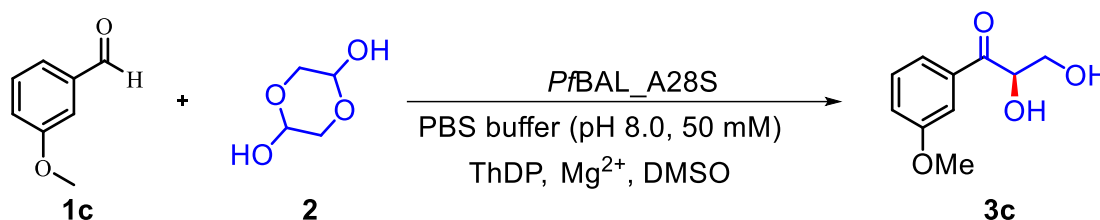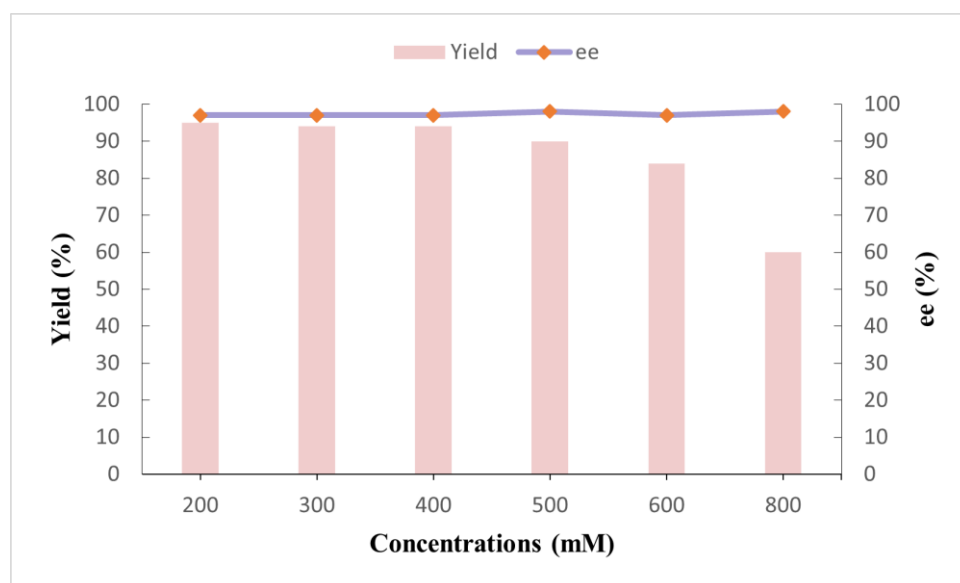

Figure S23. The results of *PfBAL\_A28S* catalysis at different substrate concentrations.

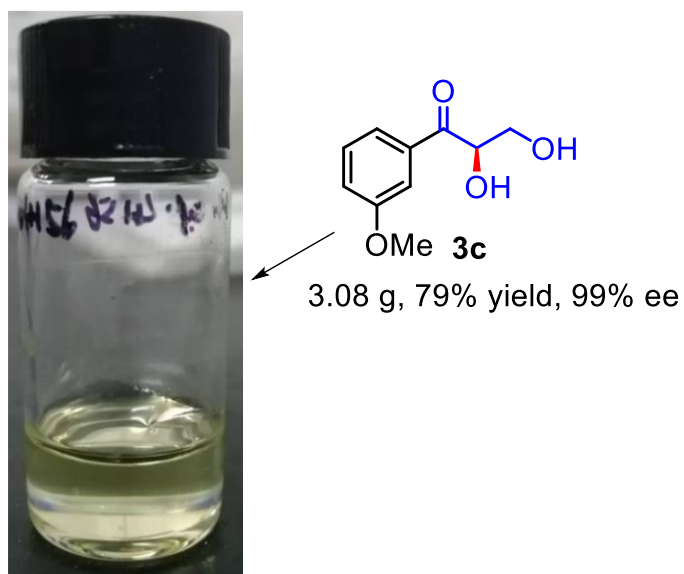

**Figure S24.** Compound **3c** produced at a 40 mL-scale preparative reaction containing 500 mM substrates.

#### 14. Kinetic characterisation of positive wild-type *PaBAL* and *PaBAL* M3 towards **1a** or **2**

The reaction mixture contained 1~3 mg purified enzyme, 50 mM **1a** or **2**, 0.15 mM ThDP, 2.5 mM MgSO<sub>4</sub>, 5% DMSO (v/v) and PBS (50 mM, pH 8.0). Different concentrations of **1a** or **2** were added to start the reaction and maintain conversion below 20% during each reaction. The yields were determined by RP-HPLC.

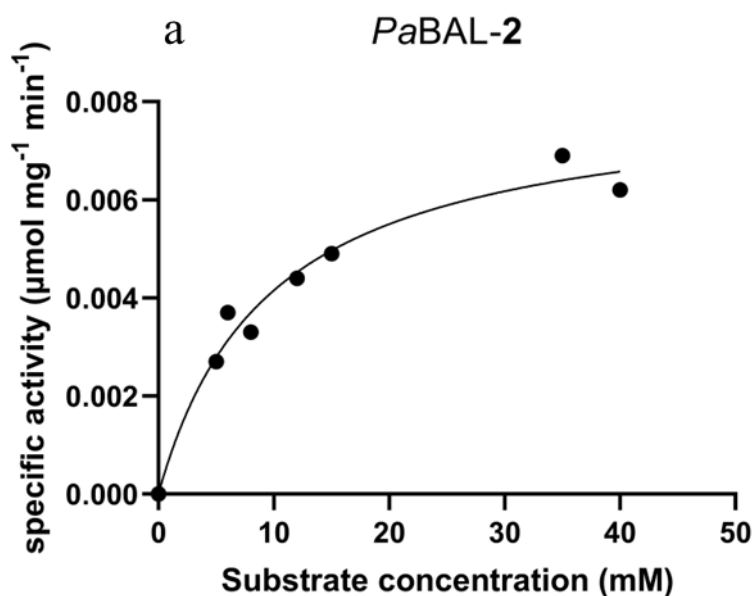

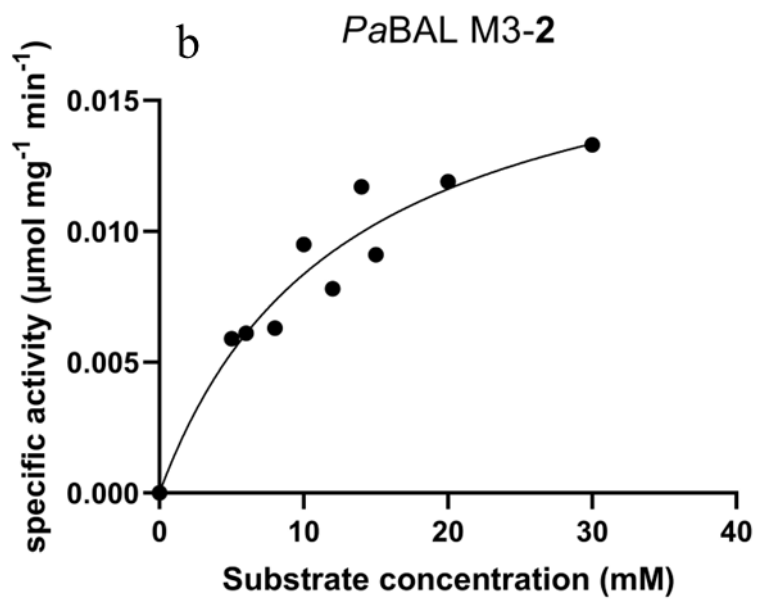

**Figure S25.** Dynamic fitting curve of different concentrations 2 and 50 mM **1a**. a, wild-type *PaBAL*. b, *PaBAL M3*.

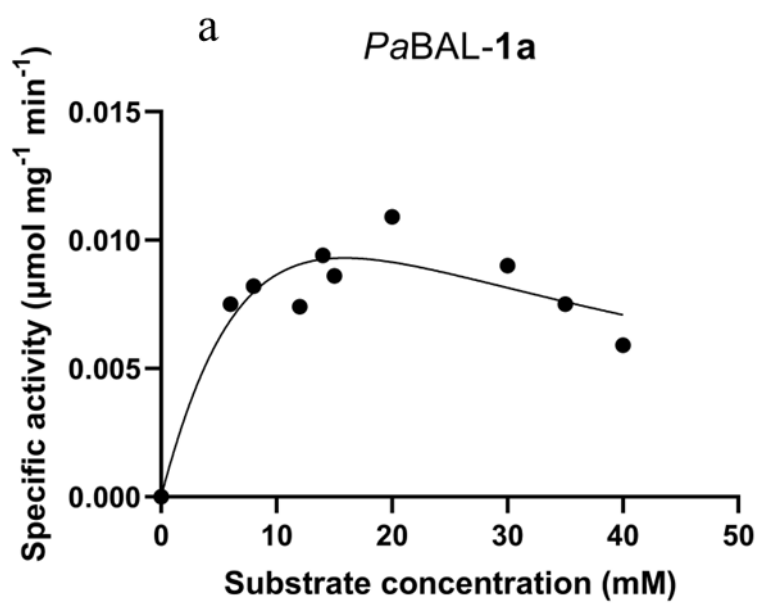



$\times 12.5 \times 10.0$  nm, containing about 130,000 atoms in total.

The Amber14SB force field was used to simulate the protein<sup>[7]</sup>, while the Generalized Amber Force Field (GAFF) was applied to the ligand<sup>5</sup>, with the topology files generated using Sobtop. The equilibrium geometry of each ligand was optimized at the B3LYP--D3(BJ)/def2-SVP level using Gaussian16 (A.0.3)<sup>[8]</sup>, and the atomic charges were derived via the RESP<sub>2.0.5</sub> method based on the electrostatic potential calculated from B3LYP/def2-TZVP level using Multiwfn<sup>[9]</sup> In MD simulations, the system was first energy-minimized, followed by linear heating from 0 K to 298.15 K over 1 ns to equilibrate the solvent environment. In this stage, the temperature and pressure were maintained via the velocity-rescale thermostat and Berendsen's barostat<sup>[10]</sup> Subsequently, a pre-equilibration simulation of 50 ns was conducted under NPT conditions using the velocity-rescale thermostat and Parrinello-Rahman isotropic barostat to relax the protein structure and reach conformational equilibrium<sup>[11]</sup>. And finally a simulation of 150 ns was conducted and treated as the equilibrated ensemble for statistical analysis. The binding free energy was calculated using GMX\_MMPBSA code<sup>[12]</sup>.

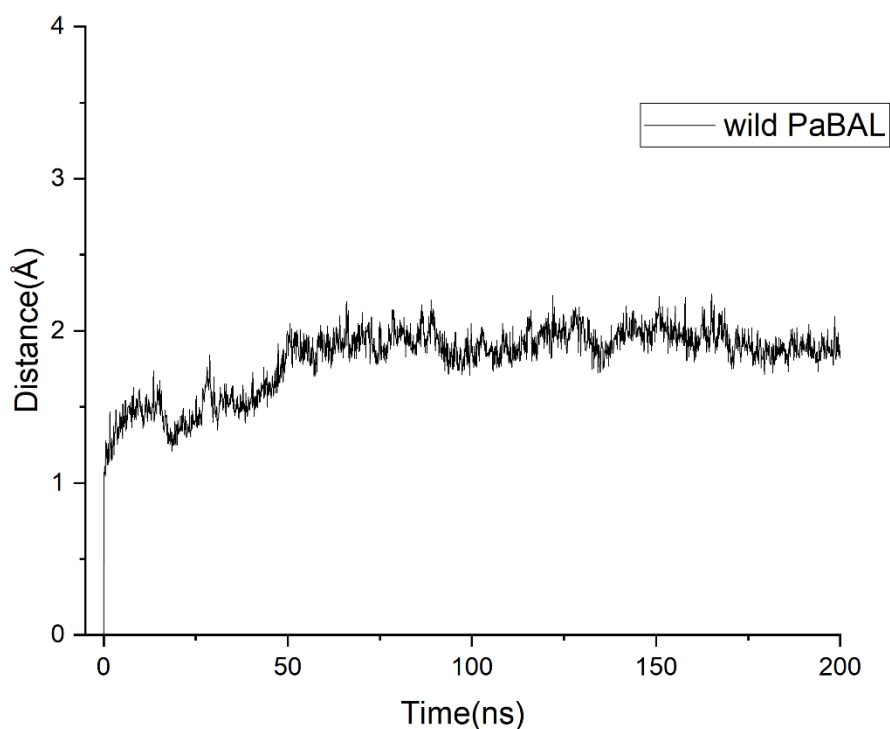

**Figure S27.** The root mean square deviation (RMSD) of wild *PaBAL* backbone heavy atoms relative to the first snapshot during the 200 ns MD simulation.

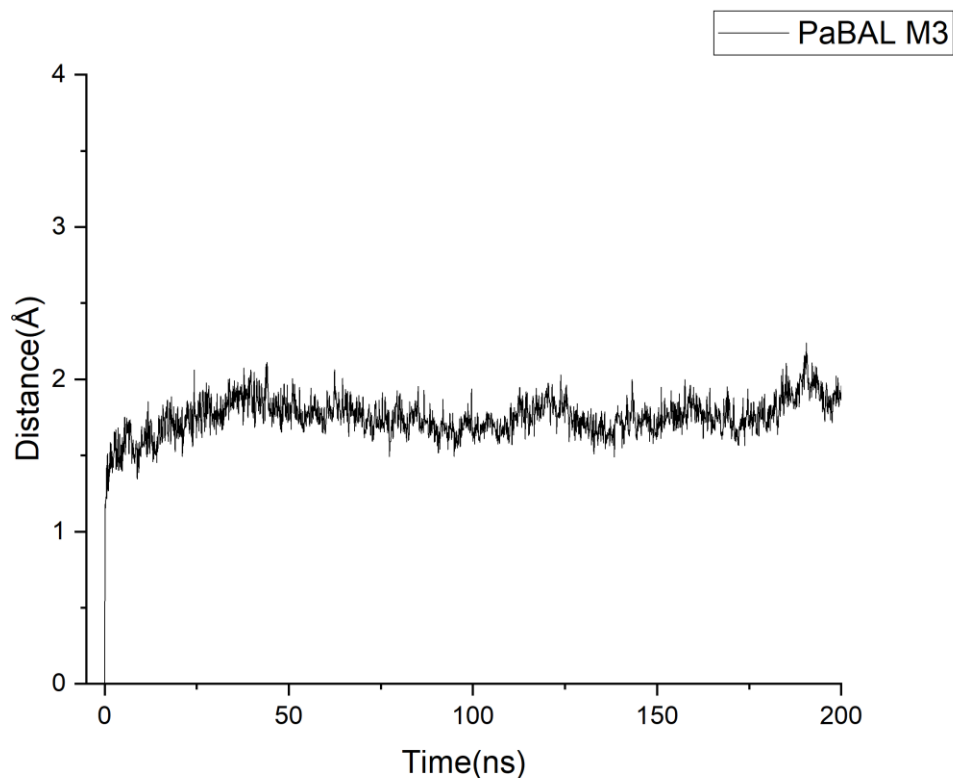

**Figure S28.** The root mean square deviation (RMSD) of wild *PaBAL* M3 backbone heavy atoms relative to the first snapshot during the 200 ns MD simulation.

**Table S18.** Binding energies of wild-type *PaBAL* and *PaBAL* M3 with Breslow intermediate, computed using the MM-PBSA method.

| Energy (kcal/mol)            | wild-type <i>PaBAL</i> | <i>PaBAL</i> M3   |
|------------------------------|------------------------|-------------------|
| $\Delta E_{\text{vdw}}$      | $-53.19 \pm 2.43$      | $-54.56 \pm 2.11$ |
| $\Delta E_{\text{elec}}$     | $-36.29 \pm 0.65$      | $-48.98 \pm 1.33$ |
| $\Delta E_{\text{pb, elec}}$ | $37.62 \pm 0.17$       | $46.37 \pm 0.68$  |
| $\Delta E_{\text{npolar}}$   | $-7.66 \pm 0.05$       | $-8.21 \pm 0.02$  |
| $\Delta G_{\text{bind}}$     | $-59.53 \pm 2.52$      | $-65.37 \pm 2.59$ |

## 16. The cost and economic analysis

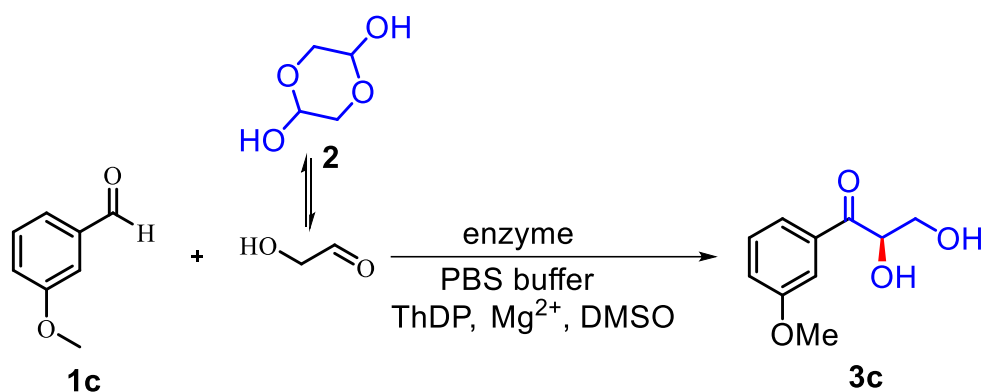

$$AE = \frac{\text{molecular weight of the product}}{\text{sum of molecular weights of all the stoichiometric reagents}}$$

$$E\text{-factor} = \frac{\text{mass of waste}}{\text{mass of the product}}$$

**Table S19.** Cost Statistics for Producing 9.72 g of **3c**

| Entry                                 | unit price    | cost (CNY) |
|---------------------------------------|---------------|------------|
| Substrate- <b>1c</b>                  | 1.024 CNY/g   | 8.36       |
| Substrate- <b>2</b>                   | 19.032 CNY/g  | 137.03     |
| ThDP                                  | 81.75 CNY/g   | 3.58       |
| MgSO <sub>4</sub>                     | 0.116 CNY/g   | 0.02       |
| Na <sub>2</sub> HPO <sub>4</sub>      | 0.043 CNY/g   | 0.15       |
| KH <sub>2</sub> PO <sub>4</sub>       | 0.0765 CNY/g  | 0.1        |
| NaCl                                  | 0.0425 CNY/g  | 1.34       |
| KCl                                   | 0.585 CNY/g   | 0.01       |
| DMSO                                  | 0.0442 CNY/mL | 1.11       |
| Tryptone                              | 0.64 CNY/g    | 19.2       |
| Yeast Extract                         | 0.336 CNY/g   | 5.04       |
| Wahaha Purified Water                 | 1.38 CNY/L    | 4.14       |
| Ethyl Acetate                         | 13 CNY/L      | 1.3        |
| Na <sub>2</sub> SO <sub>4</sub>       | 0.05 CNY/g    | 0.05       |
| Silica gel                            | 0.0475 CNY/g  | 0.1        |
| Power charge                          | 0.53 CNY/kWh  | 14.76      |
| Total Cost:                           |               | 196.28 CNY |
| Cost for producing 1 g of <b>3c</b> : |               | ¥20.19     |

**Table S20.** Some metrics for enzymatic synthesis of compound **3c**

| AE (atom economy) | E-factor | Cost |
|-------------------|----------|------|
|-------------------|----------|------|

|      |                   |             |             |
|------|-------------------|-------------|-------------|
|      | <i>PfBAL_A28S</i> | Organic NHC |             |
| 100% | 6.1               | 271         | 20.19 CNY/g |

We mainly summarized the metrics from the preparative reaction at a 500 mL scale. The substrate **2** can be hydrolyzed in water to glycolaldehyde and then participate in the reaction. No loss of atoms was observed. The E-factor of the synthetic route employing organic NHC is significantly higher than that of the enzymatic synthesis. The reason lies in the poor recoverability of organic solvents like THF in the chemical synthetic route, and low yield. The calculated cost for producing 1 g of compound **3c** is 20.19 RMB.

## 17. Characterization data of the products

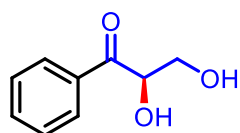

*(R)*-**3a**

**(R)-2,3-dihydroxy-1-phenylpropan-1-one:** slightly yellow oil, 88% yield (*PfBAL\_A28S*), 32% yield (*PaBAL M3*).

**<sup>1</sup>H NMR** (400 MHz, CDCl<sub>3</sub>)  $\delta$  7.92 – 7.88 (m, 2H), 7.57 (t,  $J$  = 7.4 Hz, 1H), 7.45 (t,  $J$  = 7.4 Hz, 2H), 5.18 (dd,  $J$  = 5.0, 3.1 Hz, 1H), 3.99 (dd,  $J$  = 11.9, 3.1 Hz, 1H), 3.76 – 3.71 (m,  $J$  = 5.0, 11.9 Hz 1H).

**<sup>13</sup>C NMR** (101 MHz, CDCl<sub>3</sub>)  $\delta$  199.7, 134.2, 133.7, 128.9, 128.6, 74.9, 65.2.

**HPLC analysis:** 97% ee (*PfBAL\_A28S*, *R*), 95% ee (*PaBAL M3*, *S*); DAICEL IA (*n*-hexane: *i*-PrOH = 95:5, Flow rate = 0.8 mL/min, UV = 250 nm):  $t_{R-major}$  = 32.950 min (*PfBAL\_A28S*) and  $t_{R-major}$  = 29.670 min (*PaBAL M3*).

**HRMS** (ESI,  $m/z$ ): calcd for C<sub>9</sub>H<sub>9</sub>O<sub>3</sub> [M-H]<sup>-</sup>: 165.0548, found: 165.0546.

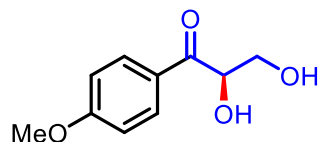

*(R)*-**3b**

**(R)-2,3-dihydroxy-1-(4-methoxyphenyl)propan-1-one:** slightly yellow oil, 66% yield (*PfBAL\_A28S*).

**<sup>1</sup>H NMR** (400 MHz, CDCl<sub>3</sub>)  $\delta$  7.92 (d,  $J$  = 9.0 Hz, 2H), 6.96 (d,  $J$  = 9.0 Hz, 2H), 5.14 – 5.09 (m, 1H), 4.02 – 3.97 (m, 1H), 3.87 (s, 3H), 3.71 (m, 1H).

**<sup>13</sup>C NMR** (101 MHz, CDCl<sub>3</sub>)  $\delta$  197.6, 164.6, 131.1, 126.4, 114.3, 74.3, 65.8, 55.7.

**HPLC analysis:** 99% ee (*PfBAL\_A28S, R*); DAICEL IA (*n*-hexane: *i*-PrOH = 90:10, Flow rate = 0.8 mL/min, UV = 250 nm):  $t_{R\text{-major}}$  = 32.892 min (*PfBAL\_A28S*).

**HRMS** (ESI, *m/z*): calcd for  $C_{10}H_{11}O_4$   $[M-H]^-$ : 195.0656, found: 195.0652.

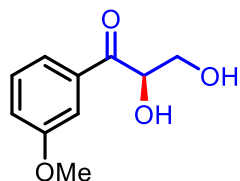

(*R*)-**3c**

(*R*)-2,3-dihydroxy-1-(3-methoxyphenyl)propan-1-one: slightly yellow oil, 93% yield (*PfBAL\_A28S*), 55% yield (*PaBAL M3*).

**$^1H$  NMR** (400 MHz,  $CDCl_3$ )  $\delta$  7.48 – 7.42 (m, 2H), 7.37 (t,  $J$  = 7.9 Hz, 1H), 7.13 (dd,  $J$  = 7.9 Hz, 1H), 5.14 (dd,  $J$  = 4.9, 3.2 Hz, 1H), 3.99 (dd,  $J$  = 11.8, 3.2 Hz, 1H), 3.82 (s, 3H), 3.75 (dd,  $J$  = 11.8, 4.9 Hz, 1H).

**$^{13}C$  NMR** (101 MHz,  $CDCl_3$ )  $\delta$  199.5, 160.0, 135.0, 130.0, 121.1, 120.7, 113.0, 75.0, 65.4, 55.5.

**HPLC analysis:** 94% ee (*PfBAL\_A28S, R*), 92% ee (*PaBAL M3, S*); DAICEL IA (*n*-hexane: *i*-PrOH = 90:10, Flow rate = 0.8 mL/min, UV = 250 nm):  $t_{R\text{-major}}$  = 24.040 min (*PfBAL\_A28S*) and  $t_{R\text{-major}}$  = 26.410 min (*PaBAL M3*).

**HRMS** (ESI, *m/z*): calcd for  $C_{10}H_{11}O_4$   $[M-H]^-$ : 195.0656, found: 195.0652.

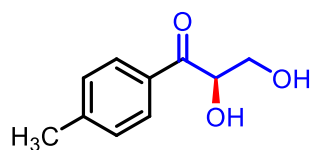

(*R*)-**3d**

(*R*)-2,3-dihydroxy-1-(*p*-tolyl)propan-1-one: slightly yellow oil, 92% yield (*PfBAL\_A28S*), 36% yield (*PaBAL M3*).

**$^1H$  NMR** (400 MHz,  $CDCl_3$ )  $\delta$  7.83 (d,  $J$  = 8.2 Hz, 2H), 7.30 (d,  $J$  = 8.2 Hz, 2H), 5.14 (dd,  $J$  = 5.2, 3.2 Hz, 1H), 4.00 (dd,  $J$  = 11.7, 3.2 Hz, 1H), 3.73 (dd,  $J$  = 11.7, 5.2 Hz, 1H), 2.42 (s, 3H).

**$^{13}C$  NMR** (101 MHz,  $CDCl_3$ )  $\delta$  199.0, 145.6, 131.0, 129.8, 128.8, 74.6, 65.6, 21.9.

**HPLC analysis:** 99% ee (*PfBAL\_A28S, R*), 94% ee (*PaBAL M3, S*); DAICEL IA (*n*-hexane: *i*-PrOH = 90:10, Flow rate = 0.8 mL/min, UV = 250 nm):  $t_{R\text{-major}}$  = 21.617 min (*PfBAL\_A28S*) and  $t_{R\text{-major}}$  = 19.718 min (*PaBAL M3*).

**HRMS** (ESI, *m/z*): calcd for  $C_{10}H_{11}O_3$   $[M-H]^-$ : 179.0704, found: 179.0703.

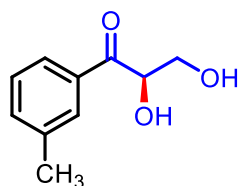

(*R*)-**3e**

**(R)-2,3-dihydroxy-1-(m-tolyl)propan-1-one:** slightly yellow oil, 89% yield (*PfBAL\_A28S*), 30% yield (*PaBAL M3*).

**<sup>1</sup>H NMR** (400 MHz, CDCl<sub>3</sub>)  $\delta$  7.74 (s, 1H), 7.71 (d,  $J = 7.6$  Hz, 1H), 7.43 (d,  $J = 8.0$  Hz, 1H), 7.38 (dd,  $J = 7.6, 8.0$  Hz, 1H), 5.16 (dd,  $J = 5.0, 3.2$  Hz, 1H), 4.01 (dd,  $J = 11.8, 3.2$  Hz, 1H), 3.74 (dd,  $J = 11.8, 5.0$  Hz, 1H), 2.41 (s, 3H).

**<sup>13</sup>C NMR** (101 MHz, CDCl<sub>3</sub>)  $\delta$  199.7, 139.1, 135.2, 133.6, 129.2, 128.9, 125.9, 74.8, 65.5, 21.4.

**HPLC analysis:** 98% ee (*PfBAL\_A28S, R*), 90% ee (*PaBAL M3, S*); DAICEL OD-H (*n*-hexane: *i*-PrOH = 95:5, Flow rate = 0.8 mL/min, UV = 250 nm):  $t_{R-major} = 28.420$  min (*PfBAL\_A28S*) and  $t_{R-major} = 24.627$  min (*PaBAL M3*).

**HRMS** (ESI,  $m/z$ ): calcd for C<sub>10</sub>H<sub>11</sub>O<sub>3</sub> [M-H]<sup>-</sup>: 179.0704, found: 179.0703.

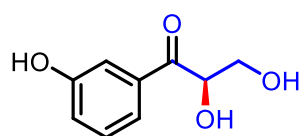

(*R*)-3f

**(R)-2,3-dihydroxy-1-(3-hydroxyphenyl)propan-1-one:** slightly yellow oil, 87% yield (*PfBAL\_A28S*).

**<sup>1</sup>H NMR** (400 MHz, DMSO-*d*<sub>6</sub>)  $\delta$  9.77 (s, 1H), 7.42 (m, 1H), 7.34 – 7.27 (m, 2H), 7.02 (m, 1H), 5.18 (d,  $J = 6.6$  Hz, 1H), 4.96 – 4.88 (m, 1H), 4.77 (m, 1H), 3.74 – 3.65 (m, 1H), 3.59 (m, 1H).

**<sup>13</sup>C NMR** (101 MHz, DMSO-*d*<sub>6</sub>)  $\delta$  200.4, 157.5, 136.7, 129.7, 120.3, 119.4, 114.7, 74.6, 64.1.

**HRMS** (ESI,  $m/z$ ): calcd for C<sub>9</sub>H<sub>9</sub>O<sub>4</sub> [M-H]<sup>-</sup>: 181.0494, found: 181.0495.

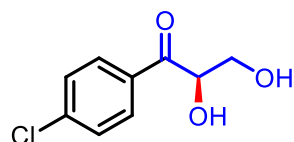

(*R*)-3g

**(R)-1-(4-chlorophenyl)-2,3-dihydroxypropan-1-one:** slightly yellow oil, 80% yield (*PfBAL\_A28S*), 15% yield (*PaBAL M3*).

**<sup>1</sup>H NMR** (400 MHz, DMSO-*d*<sub>6</sub>)  $\delta$  8.01 (d,  $J = 8.7$  Hz, 2H), 7.59 (d,  $J = 8.7$  Hz, 2H), 5.38 (s, 1H), 4.93 (m, 1H), 4.82 (s, 1H), 3.73 – 3.58 (m, 2H).

**<sup>13</sup>C NMR** (101 MHz, DMSO-*d*<sub>6</sub>)  $\delta$  199.8, 138.0, 134.2, 130.5, 128.7, 74.8, 63.9.

**HPLC analysis:** 97% ee (*PfBAL\_A28S, R*), 80% ee (*PaBAL M3, S*); DAICEL IA (*n*-hexane: *i*-PrOH = 90:10, Flow rate = 0.8 mL/min, UV = 250 nm):  $t_{R-major} = 22.861$  min (*PfBAL\_A28S*) and  $t_{R-major} = 19.363$  min (*PaBAL M3*).

**HRMS** (ESI,  $m/z$ ): calcd for C<sub>9</sub>H<sub>8</sub>O<sub>3</sub>Cl [M-H]<sup>-</sup>: 199.0157, found: 199.0157.

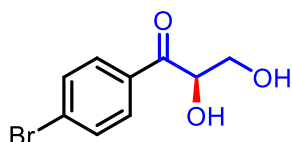

(*R*)-3h

**(*R*)-1-(4-bromophenyl)-2,3-dihydroxypropan-1-one:** slightly yellow oil, 64% yield (*PfBAL\_A28S*), 15% yield (*PaBAL M3*).

**<sup>1</sup>H NMR** (400 MHz, DMSO-*d*<sub>6</sub>) δ 7.92 (d, *J* = 8.5 Hz, 2H), 7.73 (d, *J* = 8.5 Hz, 2H), 5.38 (d, *J* = 6.5 Hz, 1H), 4.92 (m, 1H), 4.82 (t, *J* = 5.8 Hz, 1H), 3.66 (m, 2H).

**<sup>13</sup>C NMR** (101 MHz, DMSO-*d*<sub>6</sub>) δ 200.0, 134.5, 131.6, 130.6, 127.2, 74.8, 63.9.

**HPLC analysis:** 97% ee (*PfBAL\_A28S, R*), 79% ee (*PaBAL M3, S*); DAICEL IA (*n*-hexane: *i*-PrOH = 90:10, Flow rate = 0.8 mL/min, UV = 250 nm): *t*<sub>R-major</sub> = 24.624 min (*PfBAL\_A28S*) and *t*<sub>R-major</sub> = 20.936 min (*PaBAL M3*).

**HRMS** (ESI, *m/z*): calcd for C<sub>9</sub>H<sub>8</sub>O<sub>3</sub>Br [M-H]<sup>-</sup>: 242.9656 found: 242.9651.

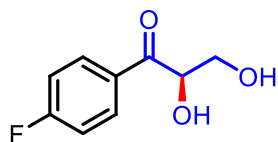

(*R*)-3i

**(*R*)-1-(4-fluorophenyl)-2,3-dihydroxypropan-1-one:** slightly yellow oil, 84% yield (*PfBAL\_A28S*), 13% yield (*PaBAL M3*).

**<sup>1</sup>H NMR** (400 MHz, DMSO-*d*<sub>6</sub>) δ 8.07 (d, *J* = 8.8 Hz, 2H), 7.34 (t, *J* = 8.8 Hz, 2H), 5.33 (d, *J* = 6.5 Hz, 1H), 4.96 – 4.90 (m, 1H), 4.80 (t, *J* = 5.8 Hz, 1H), 3.66 (m, 2H).

**<sup>13</sup>C NMR** (101 MHz, DMSO-*d*<sub>6</sub>) δ 199.3, 165.0 (d, *J* = 251.8 Hz), 132.2 (d, *J* = 2.9 Hz), 131.6 (d, *J* = 9.4 Hz), 115.6 (d, *J* = 21.7 Hz), 74.7, 64.0.

**<sup>19</sup>F NMR** (376 MHz, DMSO-*d*<sub>6</sub>) δ -106.00.

**HPLC analysis:** 98% ee (*PfBAL\_A28S, R*), 86% ee (*PaBAL M3, S*); DAICEL IA (*n*-hexane: *i*-PrOH = 90:10, Flow rate = 0.8 mL/min, UV = 250 nm): *t*<sub>R-major</sub> = 21.962 min (*PfBAL\_A28S*) and *t*<sub>R-major</sub> = 18.701 min (*PaBAL M3*).

**HRMS** (ESI, *m/z*): calcd for C<sub>9</sub>H<sub>8</sub>O<sub>3</sub>F [M-H]<sup>-</sup>: 183.0450, found: 183.0452.

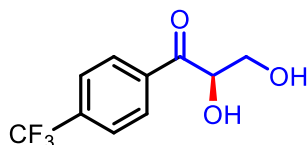

(*R*)-3j

**(*R*)-2,3-dihydroxy-1-(4-(trifluoromethyl)phenyl)propan-1-one:** slightly yellow oil, 92% yield (*PfBAL\_A28S*).

**<sup>1</sup>H NMR** (400 MHz, DMSO-*d*<sub>6</sub>) δ 8.16 (d, *J* = 8.2 Hz, 2H), 7.89 (d, *J* = 8.2 Hz, 2H), 5.49 (d, *J* = 6.4 Hz, 1H), 4.99 – 4.94 (m, 1H), 4.86 (t, *J* = 5.7 Hz, 1H), 3.70 (m, 2H).

**<sup>13</sup>C NMR** (101 MHz, DMSO-*d*<sub>6</sub>)  $\delta$  200.6, 139.0, 132.3 (q,  $J = 31.9$  Hz), 129.4, 125.5 (d,  $J = 3.7$  Hz), 123.8 (q,  $J = 251.3$  Hz), 75.1, 63.8.

**<sup>19</sup>F NMR** (376 MHz, DMSO-*d*<sub>6</sub>)  $\delta$  -61.60.

**HRMS** (ESI,  $m/z$ ): calcd for C<sub>10</sub>H<sub>8</sub>O<sub>3</sub>F<sub>3</sub> [M-H]<sup>-</sup>: 233.0421, found: 233.0420.

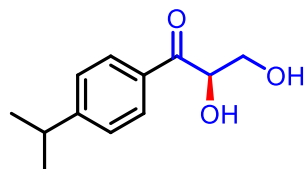

(*R*)-3k

**(*R*)-2,3-dihydroxy-1-(4-isopropylphenyl)propan-1-one**: slightly yellow oil, 54% yield (*Pf*BAL\_A28S), 44% yield (*Pa*BAL M3).

**<sup>1</sup>H NMR** (400 MHz, CDCl<sub>3</sub>)  $\delta$  7.86 (d,  $J = 8.4$  Hz, 2H), 7.33 (d,  $J = 8.4$  Hz, 2H), 5.15 (dd,  $J = 5.1, 3.2$  Hz, 1H), 4.01 (dd,  $J = 11.8, 3.2$  Hz, 1H), 3.73 (dd,  $J = 11.8, 5.1$  Hz, 1H), 2.96 (m,  $J = 6.9$  Hz, 1H), 1.25 (d,  $J = 6.9$  Hz, 6H).

**<sup>13</sup>C NMR** (101 MHz, CDCl<sub>3</sub>)  $\delta$  199.0, 158.5, 130.9, 128.7, 126.1, 74.7, 65.6, 35.4, 31.1.

**HPLC analysis**: 98% ee (*Pf*BAL\_A28S, *R*), 95% ee (*Pa*BAL M3, *S*); DAICEL IA (*n*-hexane: *i*-PrOH = 90:10, Flow rate = 0.8 mL/min, UV = 250 nm):  $t_{R-major} = 18.308$  min (*Pf*BAL\_A28S) and  $t_{R-major} = 14.746$  min (*Pa*BAL M3).

**HRMS** (ESI,  $m/z$ ): calcd for C<sub>12</sub>H<sub>15</sub>O<sub>3</sub>[M-H]<sup>-</sup>: 207.1019, found: 207.1016.

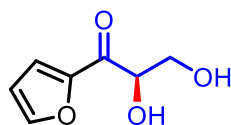

(*R*)-3l

**(*R*)-1-(furan-2-yl)-2,3-dihydroxypropan-1-one**: slightly yellow oil, 42% yield (*Pf*BAL\_A28S).

**<sup>1</sup>H NMR** (400 MHz, DMSO-*d*<sub>6</sub>)  $\delta$  8.00 (s, 1H), 7.54 (d,  $J = 3.6$  Hz, 1H), 6.73 – 6.70 (m, 1H), 5.40 (d,  $J = 6.2$  Hz, 1H), 4.81 (t,  $J = 5.9$  Hz, 1H), 4.63 (m, 1H), 3.65 (m, 2H).

**<sup>13</sup>C NMR** (101 MHz, DMSO-*d*<sub>6</sub>)  $\delta$  188.9, 150.8, 147.8, 119.9, 112.4, 74.8, 64.0.

**HPLC analysis**: 84% ee (*Pf*BAL\_A28S, *R*); DAICEL IA (*n*-hexane: *i*-PrOH = 90:10, Flow rate = 0.8 mL/min, UV = 250 nm):  $t_{R-major} = 27.557$  min (*Pf*BAL\_A28S).

**HRMS** (ESI,  $m/z$ ): calcd for C<sub>7</sub>H<sub>7</sub>O<sub>4</sub>[M-H]<sup>-</sup>: 155.0340, found: 155.0339.

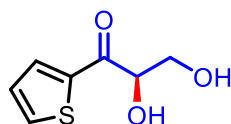

(*R*)-3m

**(*R*)-2,3-dihydroxy-1-(thiophen-2-yl)propan-1-one**: slightly yellow oil, 72% yield (*Pf*BAL\_A28S), 9% yield (*Pa*BAL M3).

**<sup>1</sup>H NMR** (400 MHz, CDCl<sub>3</sub>) δ 7.82 (d, *J* = 3.9 Hz, 1H), 7.77 (d, *J* = 5.0 Hz, 1H), 7.23 – 7.18 (m, *J* = 3.9, 5.0 Hz 1H), 4.99 – 4.95 (m, 1H), 4.06 (dd, *J* = 11.7, 3.4 Hz, 1H), 3.87 (dd, *J* = 11.7, 5.1 Hz, 1H).

**<sup>13</sup>C NMR** (101 MHz, CDCl<sub>3</sub>) δ 191.8 139.8 135.5 133.5, 128.7, 75.3, 66.2.

**HPLC analysis:** 93% ee (*Pf*BAL\_A28S, *R*), 92% ee (*Pa*BAL M3, *S*); DAICEL IC (*n*-hexane: *i*-PrOH = 85:15, Flow rate = 0.8 mL/min, UV = 250 nm): *t*<sub>R-major</sub> = 23.483 min (*Pf*BAL\_A28S) and *t*<sub>R-major</sub> = 27.507 min (*Pa*BAL M3).

**HRMS** (ESI, *m/z*): calcd for C<sub>7</sub>H<sub>7</sub>O<sub>3</sub>S [M-H]<sup>-</sup>: 171.0109, found: 171.0110.

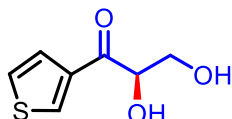

(*R*)-**3n**

(*R*)-**2,3-dihydroxy-1-(thiophen-3-yl)propan-1-one**: slightly yellow oil, 76% yield (*Pf*BAL\_A28S).

**<sup>1</sup>H NMR** (400 MHz, CDCl<sub>3</sub>) δ 8.19 (dd, *J* = 2.9, 1.3 Hz, 1H), 7.56 (dd, *J* = 5.1, 1.3 Hz, 1H), 7.38 (dd, *J* = 5.1, 2.9 Hz, 1H), 4.96 (m, 1H), 4.02 (dd, *J* = 11.8, 3.3 Hz, 1H), 3.80 (dd, *J* = 11.8, 5.0 Hz, 1H).

**<sup>13</sup>C NMR** (101 MHz, CDCl<sub>3</sub>) δ 193.4, 138.1, 133.9, 127.2, 127.0, 75.7, 65.7.

**HPLC analysis:** 95% ee (*Pf*BAL\_A28S, *R*); DAICEL IA (*n*-hexane: *i*-PrOH = 90:10, Flow rate = 0.8 mL/min, UV = 250 nm): *t*<sub>R-major</sub> = 27.178 min (*Pf*BAL\_A28S).

**HRMS** (ESI, *m/z*): calcd for C<sub>7</sub>H<sub>7</sub>O<sub>3</sub>S [M-H]<sup>-</sup>: 171.0109, found: 171.0110.

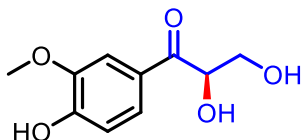

(*R*)-**3o**

(*R*)-**2,3-dihydroxy-1-(4-hydroxy-3-methoxyphenyl)propan-1-one**: slightly yellow oil, 88% yield (*Pf*BAL\_A28S).

**<sup>1</sup>H NMR** (400 MHz, DMSO-*d*<sub>6</sub>) δ 10.02 (s, 1H), 7.58 (d, *J* = 8.3 Hz, 1H), 7.51 (s, 1H), 6.89 (d, *J* = 8.3 Hz, 1H), 5.06 (s, 1H), 4.99 (m, *J* = 4.2, 11.3 Hz, 1H), 4.76 (s, 1H), 3.83 (s, 3H), 3.72 (d, *J* = 11.3 Hz, 1H), 3.64 (d, *J* = 4.2 Hz, 1H).

**<sup>13</sup>C NMR** (101 MHz, DMSO-*d*<sub>6</sub>) δ 198.5, 152.0, 147.7, 127.1, 123.8, 115.1, 111.9, 74.1, 64.7, 55.8.

**HRMS** (ESI, *m/z*): calcd for C<sub>10</sub>H<sub>11</sub>O<sub>5</sub> [M-H]<sup>-</sup>: 211.0600, found: 211.0601.

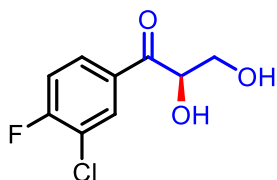

(*R*)-3p

(*R*)-1-(3-chloro-4-fluorophenyl)-2,3-dihydroxypropan-1-one: slightly yellow oil, 81% yield (*PfBAL\_A28S*), 24% yield (*PaBAL M3*).

**<sup>1</sup>H NMR** (400 MHz, CDCl<sub>3</sub>) δ 7.97 (dd, *J* = 7.0, 2.2 Hz, 1H), 7.81 (dd, *J* = 8.7, 2.2 Hz, 1H), 7.21 (t, *J* = 8.5 Hz, 1H), 5.15 – 5.11 (m, 1H), 3.98 (dd, *J* = 12.0, 3.2 Hz, 1H), 3.76 (dd, *J* = 12.0, 4.9 Hz, 1H).

**<sup>13</sup>C NMR** (101 MHz, CDCl<sub>3</sub>) δ 197.5, 161.6 (d, *J* = 259.0 Hz), 131.6, 131.1 (d, *J* = 3.7 Hz), 129.2 (d, *J* = 8.6 Hz), 122.4 (d, *J* = 18.3 Hz), 117.3 (d, *J* = 21.8 Hz), 75.0, 64.9.

**<sup>19</sup>F NMR** (376 MHz, CDCl<sub>3</sub>) δ -104.90.

**HPLC analysis:** 97% ee (*PfBAL\_A28S*, *R*), 84% ee (*PaBAL M3*, *S*); DAICEL IA (*n*-hexane: *i*-PrOH = 90:10, Flow rate = 0.8 mL/min, UV = 250 nm): *t*<sub>R-major</sub> = 18.463 min (*PfBAL\_A28S*) and *t*<sub>R-major</sub> = 16.105 min (*PaBAL M3*).

**HRMS** (ESI, *m/z*): calcd for C<sub>9</sub>H<sub>7</sub>O<sub>3</sub>ClF [M-H]<sup>-</sup>: 217.0025, found: 217.0062.

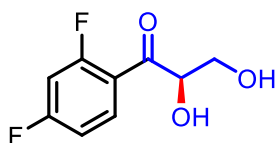

(*R*)-3q

(*R*)-1-(2,4-difluorophenyl)-2,3-dihydroxypropan-1-one: slightly yellow oil, 66% yield (*PfBAL\_A28S*).

**<sup>1</sup>H NMR** (400 MHz, CDCl<sub>3</sub>) δ 8.01 – 7.93 (m, 1H), 7.04 – 6.97 (m, 1H), 6.90 (m, 1H), 5.01 (m, *J* = 1.8, 3.3 Hz, 1H), 3.99 (dd, *J* = 12.1, 1.8 Hz, 1H), 3.80 (m, *J* = 12.1, 3.3 Hz, 1H).

**<sup>13</sup>C NMR** (101 MHz, CDCl<sub>3</sub>) δ 196.8 (d, *J* = 4.6 Hz), 166.7 (dd, *J* = 12.5, 259.2 Hz), 162.6 (dd, *J* = 12.6, 257.1 Hz), 133.4 (dd, *J* = 4.4, 10.8 Hz), 119.0 (dd, *J* = 3.6, 13.5 Hz), 113.1 (dd, *J* = 3.2, 21.7 Hz), 105.1, 77.8 (d, *J* = 8.6 Hz), 64.0.

**<sup>19</sup>F NMR** (376 MHz, CDCl<sub>3</sub>) δ -99.14, -103.98.

**HPLC analysis:** 96% ee (*PfBAL\_A28S*, *R*); DAICEL IA (*n*-hexane: *i*-PrOH = 93:7, Flow rate = 0.8 mL/min, UV = 250 nm): *t*<sub>R-major</sub> = 25.577 min (*PfBAL\_A28S*).

**HRMS** (ESI, *m/z*): calcd for C<sub>9</sub>H<sub>7</sub>F<sub>2</sub>O<sub>3</sub> [M-H]<sup>-</sup>: 201.0358, found: 201.0358.

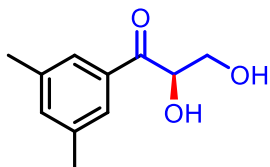

(*R*)-3r

**(R)-1-(3,5-dimethylphenyl)-2,3-dihydroxypropan-1-one:** slightly yellow oil, 77% yield (*PfBAL\_A28S*), 37% yield (*PaBAL M3*).

**<sup>1</sup>H NMR** (400 MHz, DMSO-*d*<sub>6</sub>) δ 7.58 (s, 2H), 7.26 (s, 1H), 5.15 (d, *J* = 6.7 Hz, 1H), 4.99 (q, *J* = 5.7, 4.7 Hz, 1H), 4.76 (t, *J* = 5.8 Hz, 1H), 3.71 (m, *J* = 11.1, 4. Hz, 1H), 3.61 (m, *J* = 11.1, 5.7 Hz, 1H), 2.33 (s, 6H).

**<sup>13</sup>C NMR** (101 MHz, DMSO-*d*<sub>6</sub>) δ 200.7, 137.9, 135.5, 134.5, 126.1, 74.5, 64.2, 20.8.

**HPLC analysis:** 98% ee (*PfBAL\_A28S*, *R*), 93% ee (*PaBAL M3*, *S*); DAICEL IA (*n*-hexane: *i*-PrOH = 90:10, Flow rate = 0.8 mL/min, UV = 250 nm): *t*<sub>R-major</sub> = 13.426 min (*PfBAL\_A28S*) and *t*<sub>R-major</sub> = 12.747 min (*PaBAL M3*).

**HRMS** (ESI, *m/z*): calcd for C<sub>11</sub>H<sub>13</sub>O<sub>3</sub>[M-H]<sup>-</sup>: 193.0859, found: 183.0859.

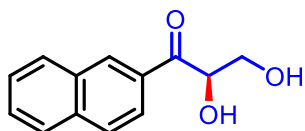

**(R)-3s**

**(R)-2,3-dihydroxy-1-(naphthalen-2-yl)propan-1-one:** slightly yellow oil, 33% yield (*PfBAL\_A28S*), 24% yield (*PaBAL M3*).

**<sup>1</sup>H NMR** (400 MHz, CDCl<sub>3</sub>) δ 8.46 (s, 1H), 7.93 (m, 4H), 7.61 (m, 2H), 5.34 (d, *J* = 5.2 Hz, 1H), 4.10 (dd, *J* = 11.8, 3.2 Hz, 1H), 3.82 (dd, *J* = 11.8, 5.2 Hz, 1H).

**<sup>13</sup>C NMR** (101 MHz, CDCl<sub>3</sub>) δ 199.4, 136.2, 132.5, 130.9, 130.8, 129.8, 129.3, 129.1, 128.0, 127.4, 123.9, 74.8, 65.7.

**HPLC analysis:** 97% ee (*PfBAL\_A28S*, *R*), 95% ee (*PaBAL M3*, *S*); DAUCCEL IA (*n*-hexane: *i*-PrOH = 90:10, Flow rate = 0.8 mL/min, UV = 250 nm): *t*<sub>R-major</sub> = 28.121 min (*PfBAL\_A28S*) and *t*<sub>R-major</sub> = 25.978 min (*PaBAL M3*).

**HRMS** (ESI, *m/z*): calcd for C<sub>13</sub>H<sub>11</sub>O<sub>3</sub>[M-H]<sup>-</sup>: 215.0704, found: 215.0703.

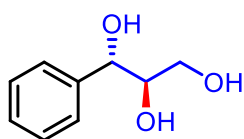

**4a**

**(1S,2R)-1-phenylpropane-1,2,3-triol**<sup>[4]</sup>: slightly yellow oil, 60% yield, *dr*=7:1.

**<sup>1</sup>H NMR** (400 MHz, D<sub>2</sub>O) δ 7.48 – 7.36 (m, 5H), 4.65 (d, *J* = 7.0 Hz, 1H), 3.92 (td, *J* = 7.0, 3.2 Hz, 1H), 3.80 (dd, *J* = 11.8, 3.3 Hz, 1H), 3.62 (dd, *J* = 11.8, 6.8 Hz, 1H).

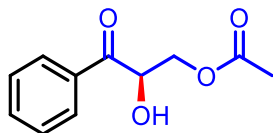

**4b**

**(R)-2-hydroxy-3-oxo-3-phenylpropyl acetate:** slightly yellow oil, 40% yield.

**<sup>1</sup>H NMR** (400 MHz, CDCl<sub>3</sub>) δ 7.98 (d, *J* = 7.0 Hz, 2H), 7.65 (t, *J* = 7.4 Hz, 1H), 7.52

(t,  $J = 7.8$  Hz, 2H), 5.30 (dd,  $J = 5.8, 3.2$  Hz, 1H), 4.56 (dd,  $J = 11.7, 3.1$  Hz, 1H), 4.12 (dd,  $J = 11.8, 5.8$  Hz, 1H), 2.02 (s, 3H).

**$^{13}\text{C}$  NMR** (101 MHz,  $\text{CDCl}_3$ )  $\delta$  198.6, 171.0, 134.6, 133.5, 129.2, 128.8, 72.1, 66.9, 20.8.

## 18. NMR Spectra of products

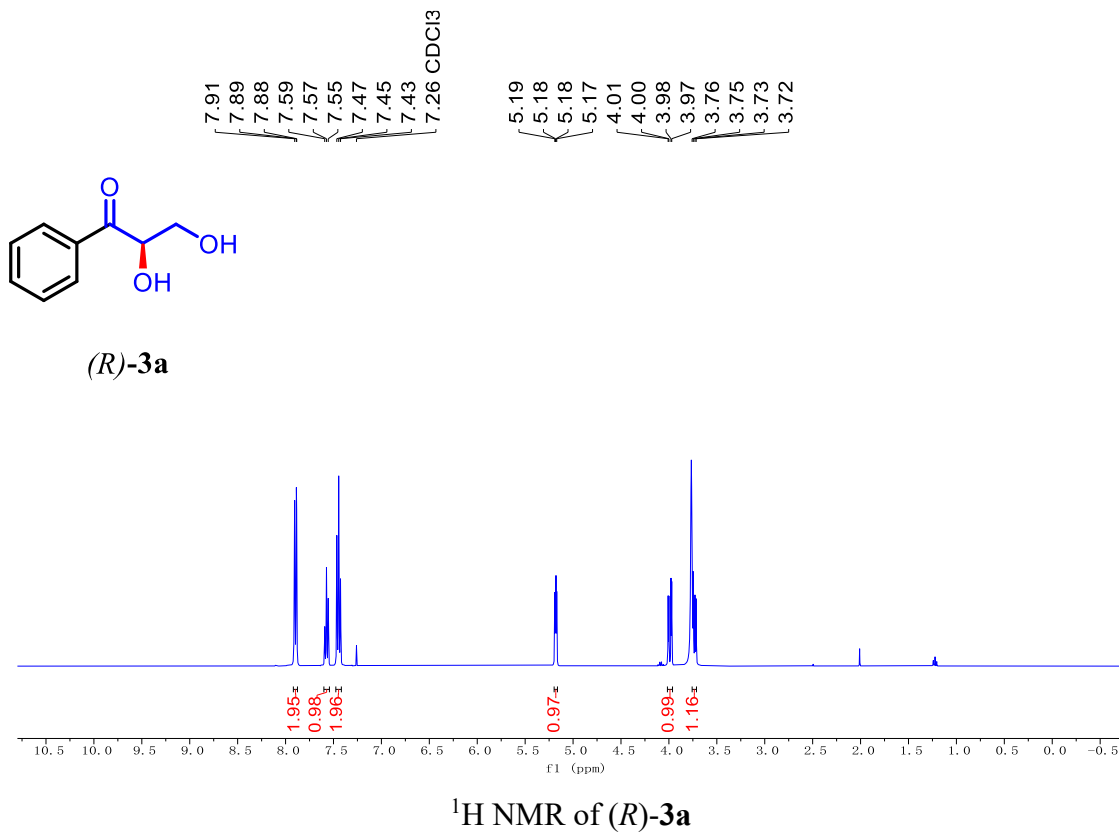

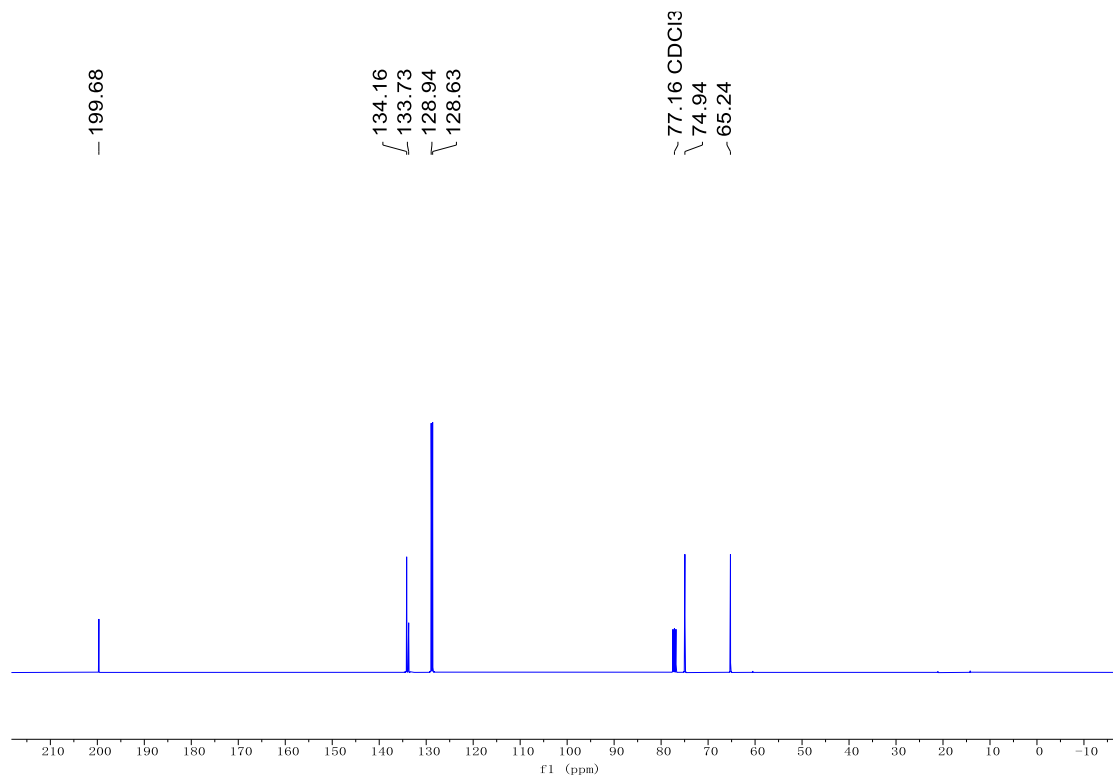

$^{13}\text{C}$  NMR of *(R)*-3a

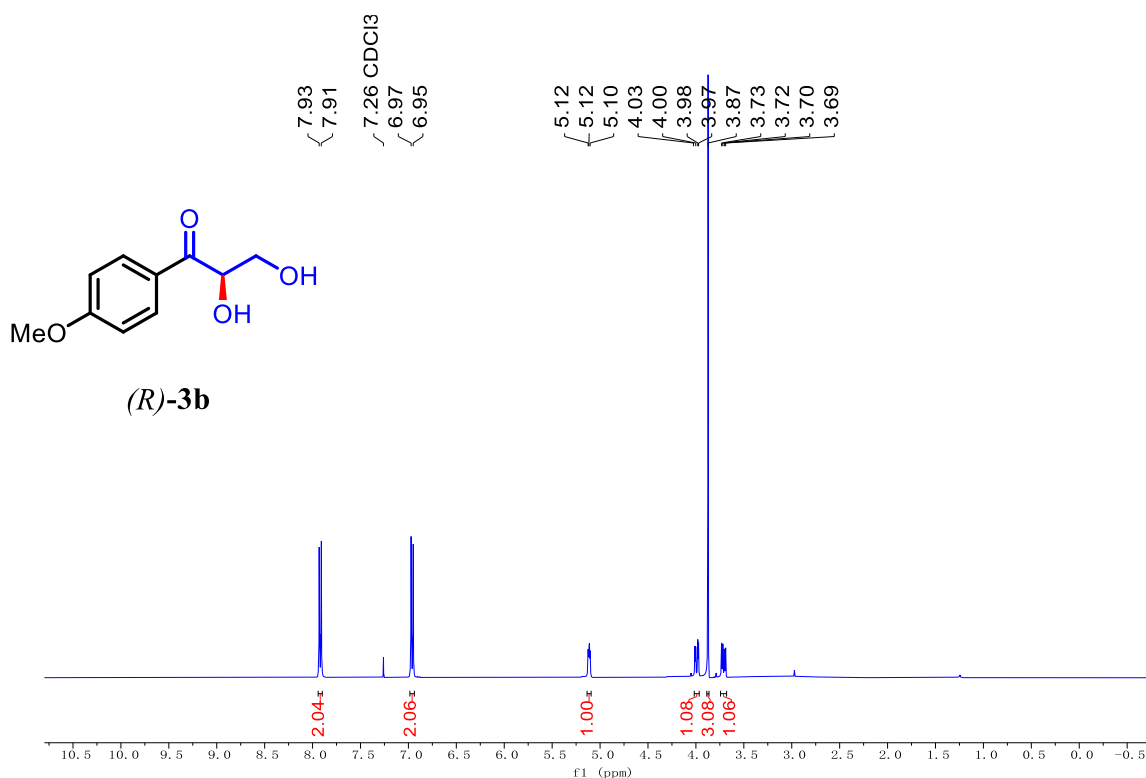

$^1\text{H}$  NMR of *(R)*-3b

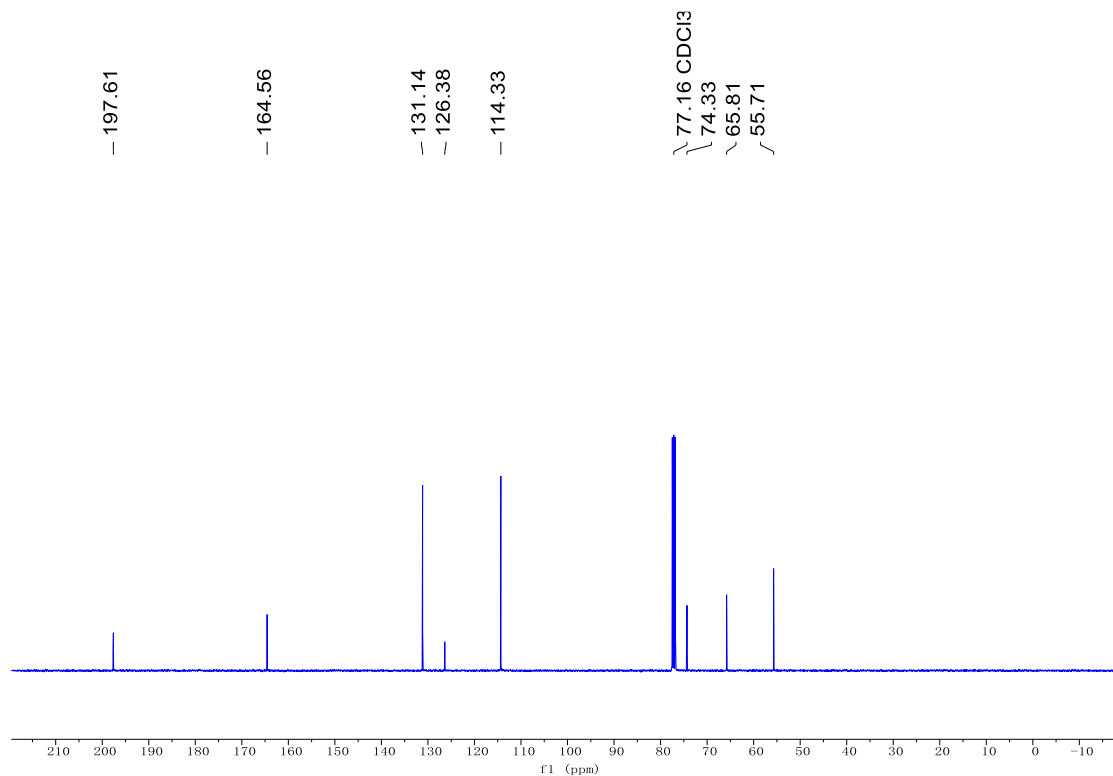

$^{13}\text{C}$  NMR of (*R*)-**3b**

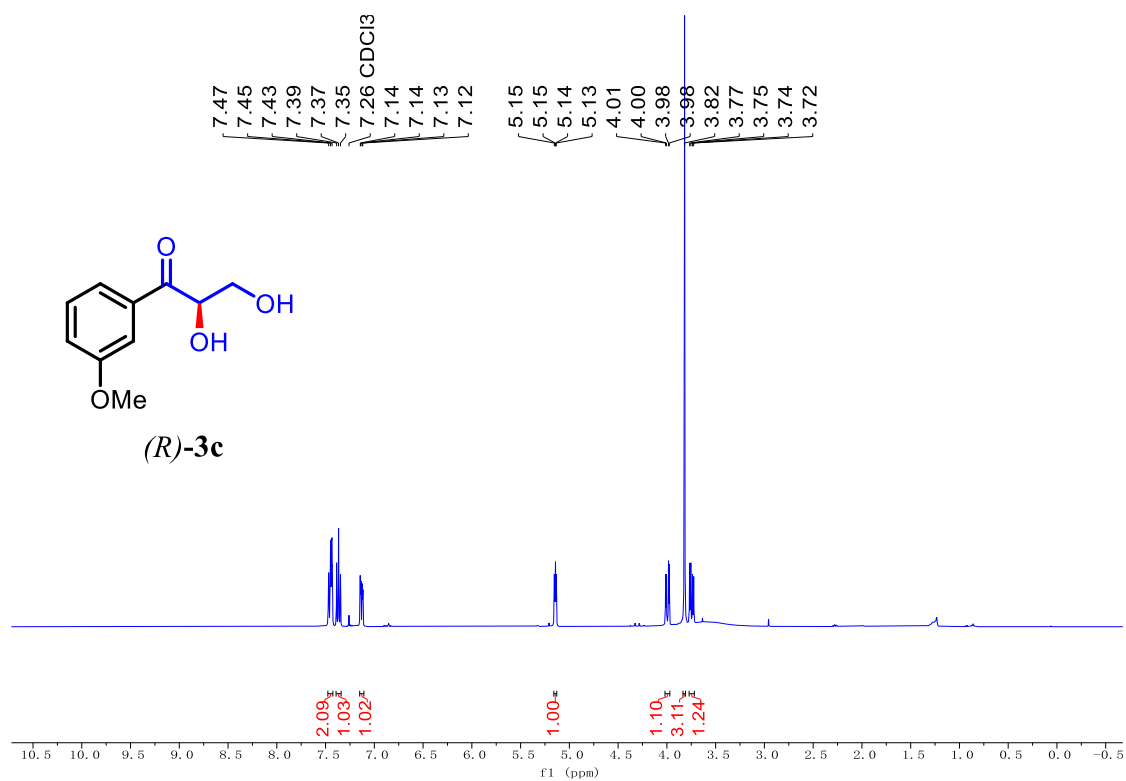

(*R*)-**3c**

$^1\text{H}$  NMR of (*R*)-**3c**

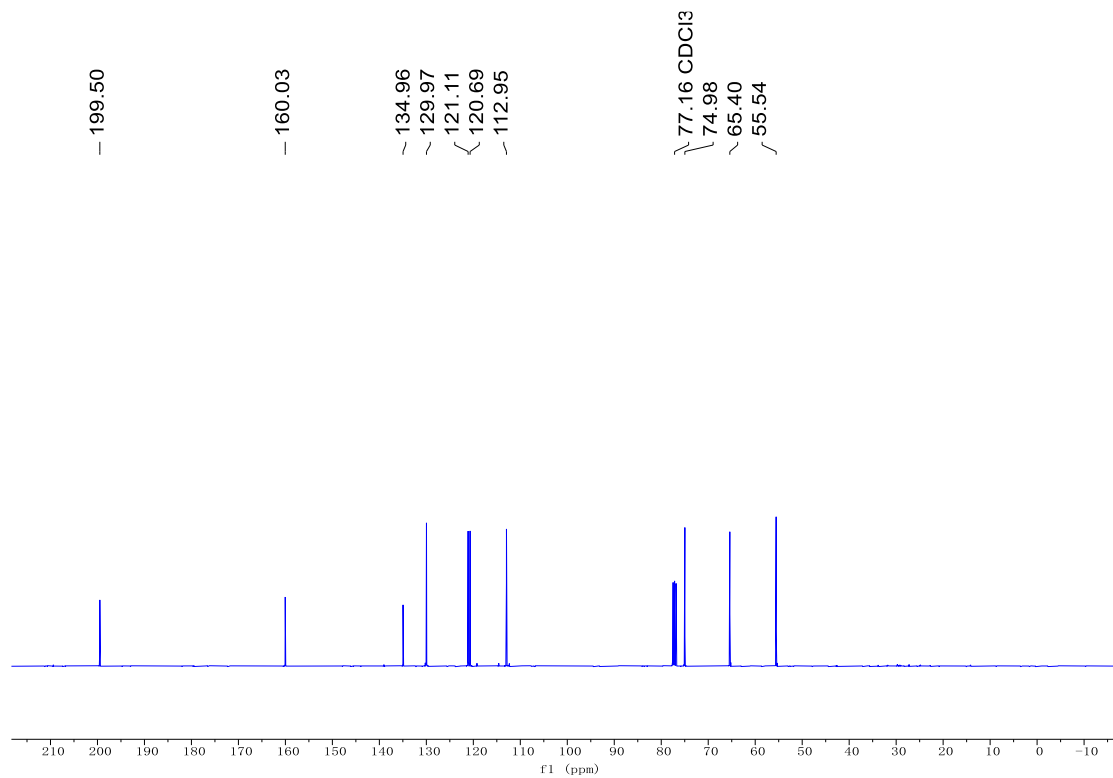

<sup>13</sup>C NMR of (R)-3c

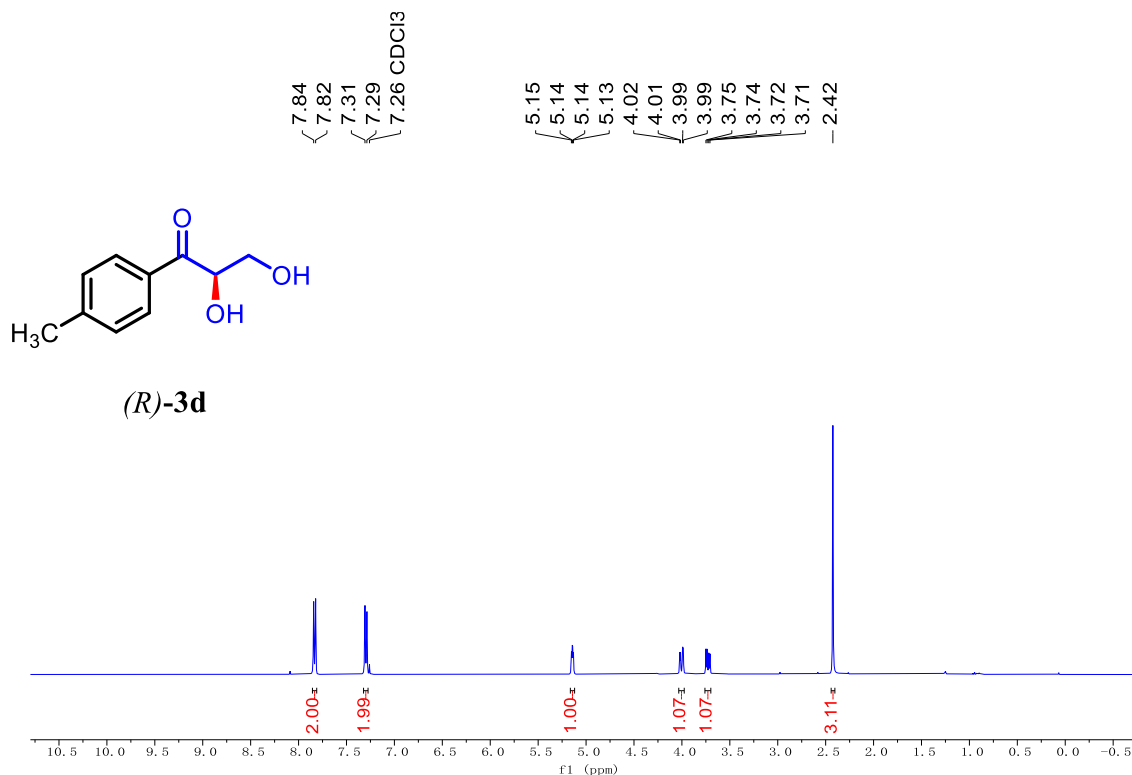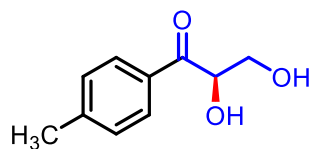

(R)-3d

<sup>1</sup>H NMR of (R)-3d

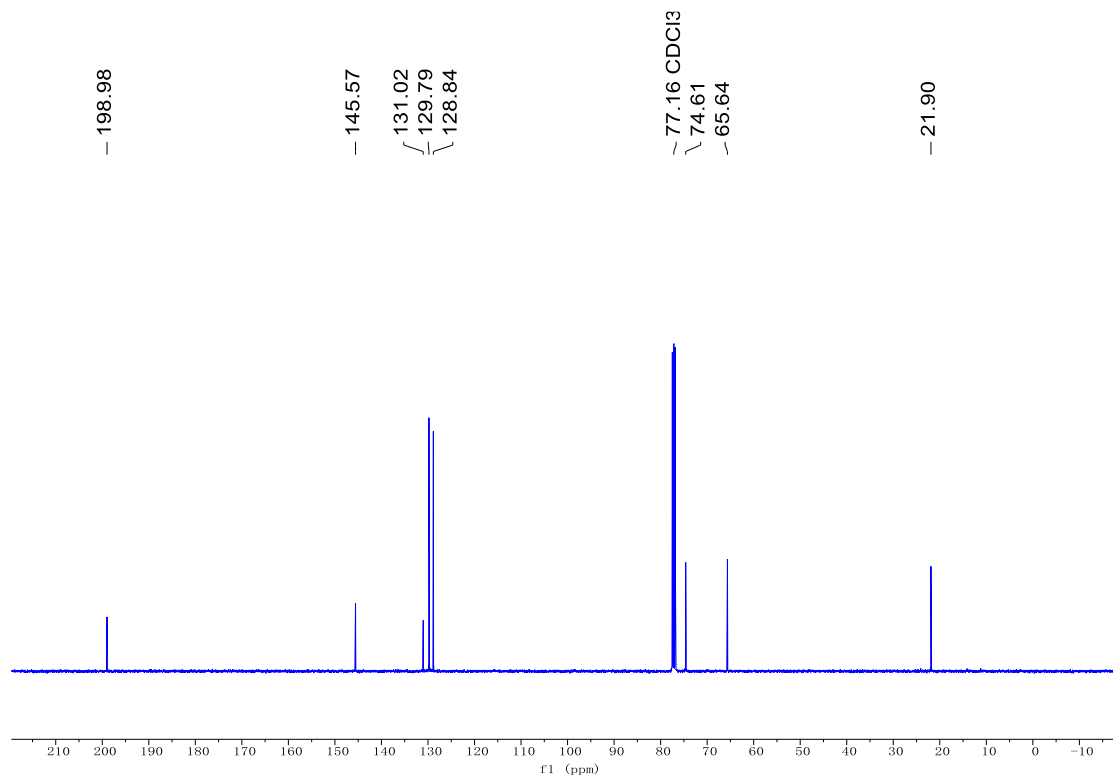

<sup>13</sup>C NMR of (R)-3d

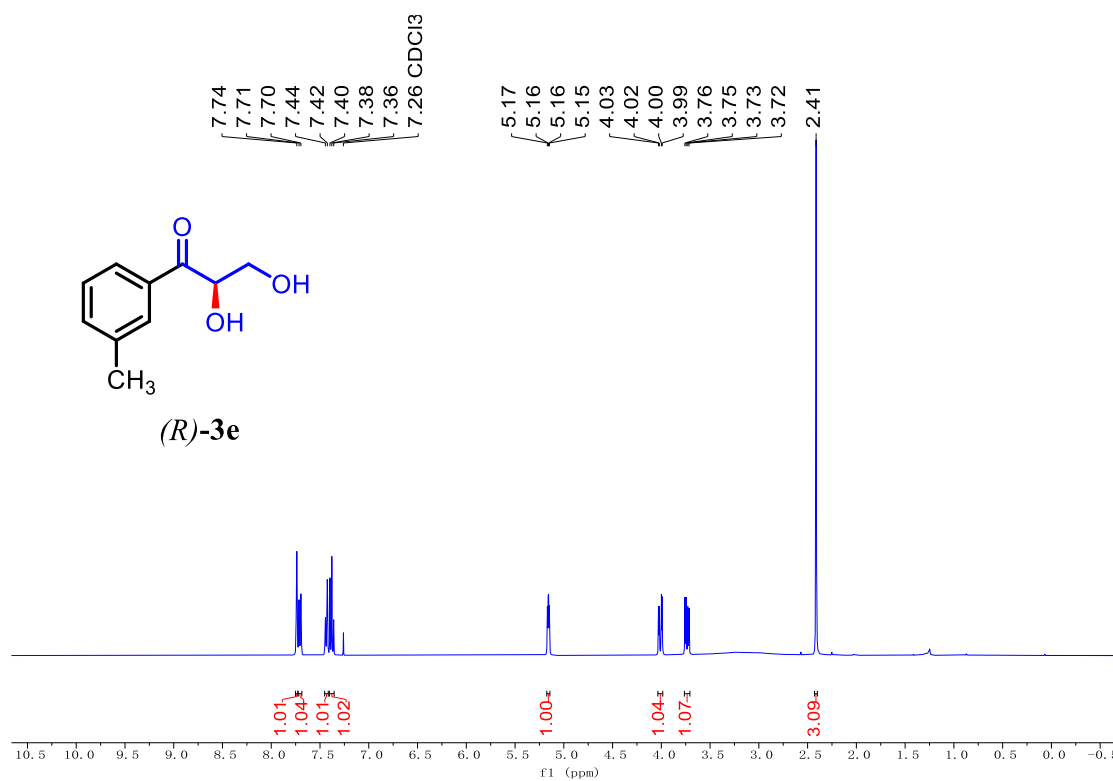

<sup>1</sup>H NMR of (R)-3e

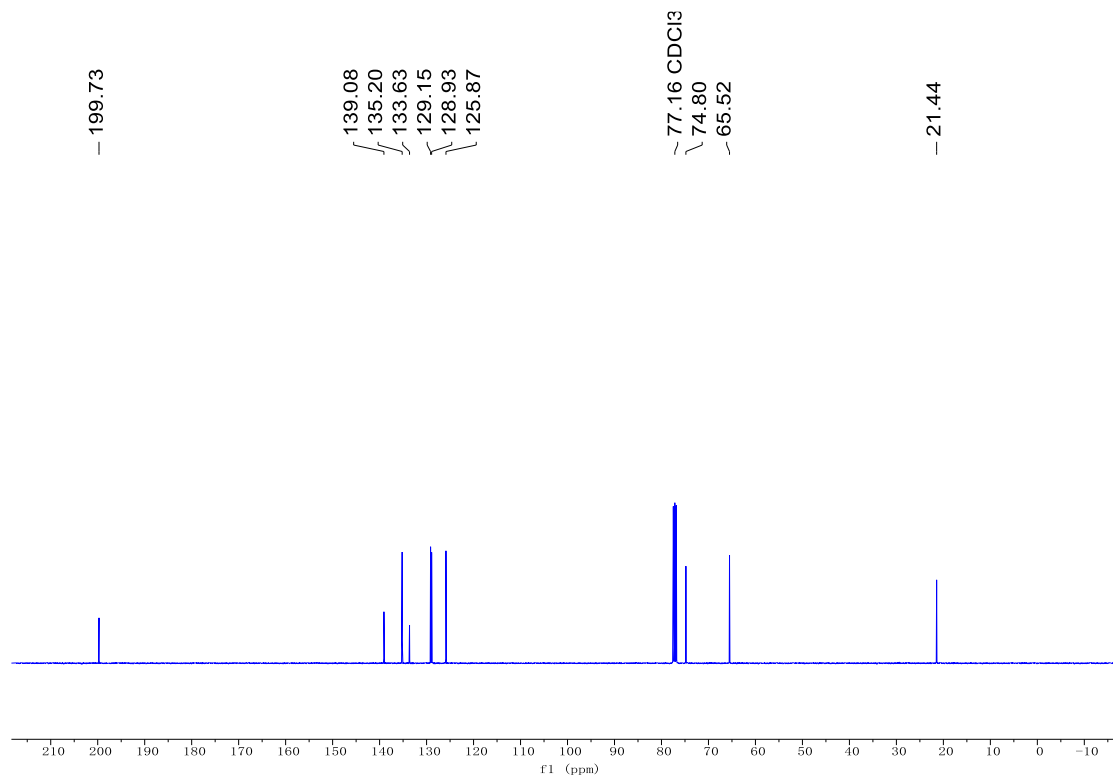

<sup>13</sup>C NMR of (R)-3e

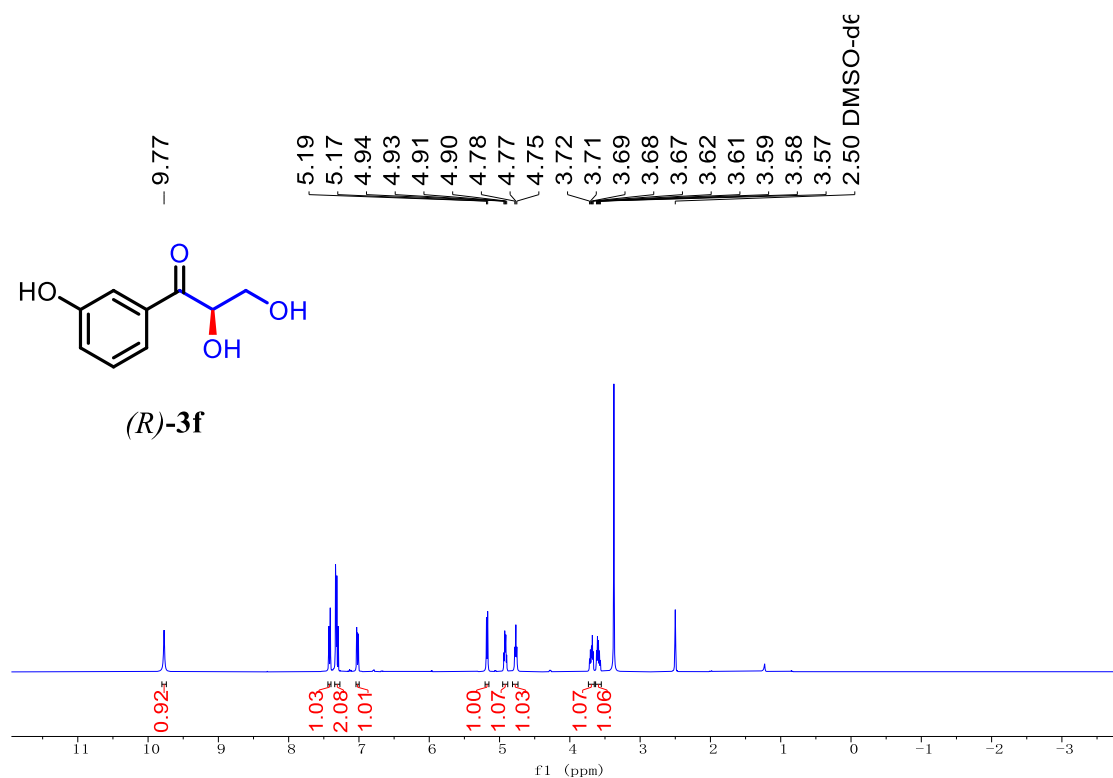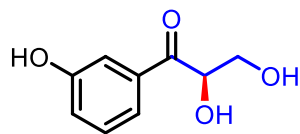

(R)-3f

<sup>1</sup>H NMR of (R)-3f

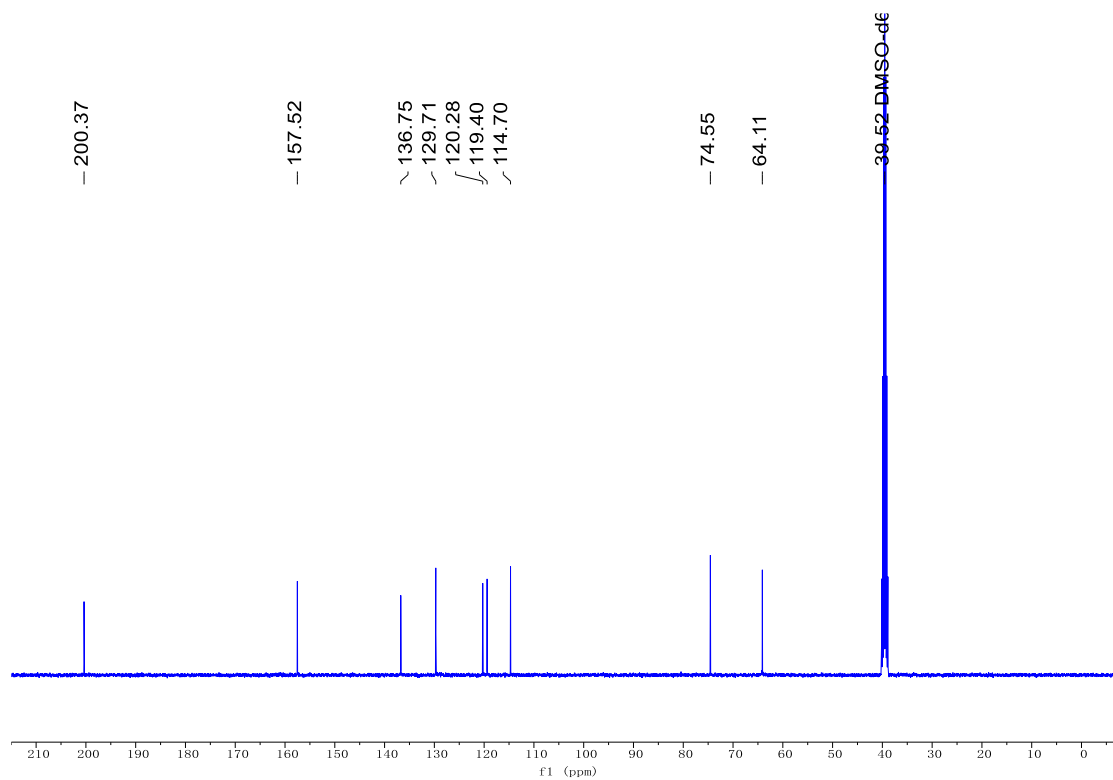

<sup>13</sup>C NMR of (*R*)-3f

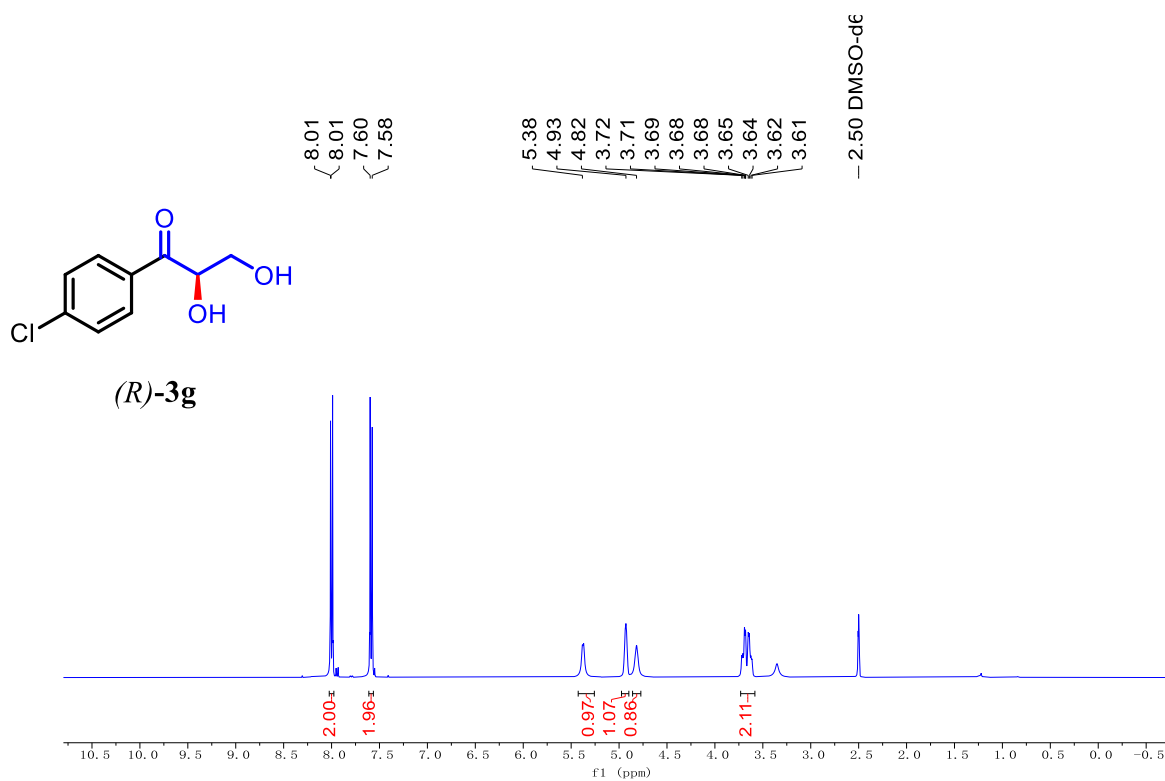

<sup>1</sup>H NMR of (*R*)-3g

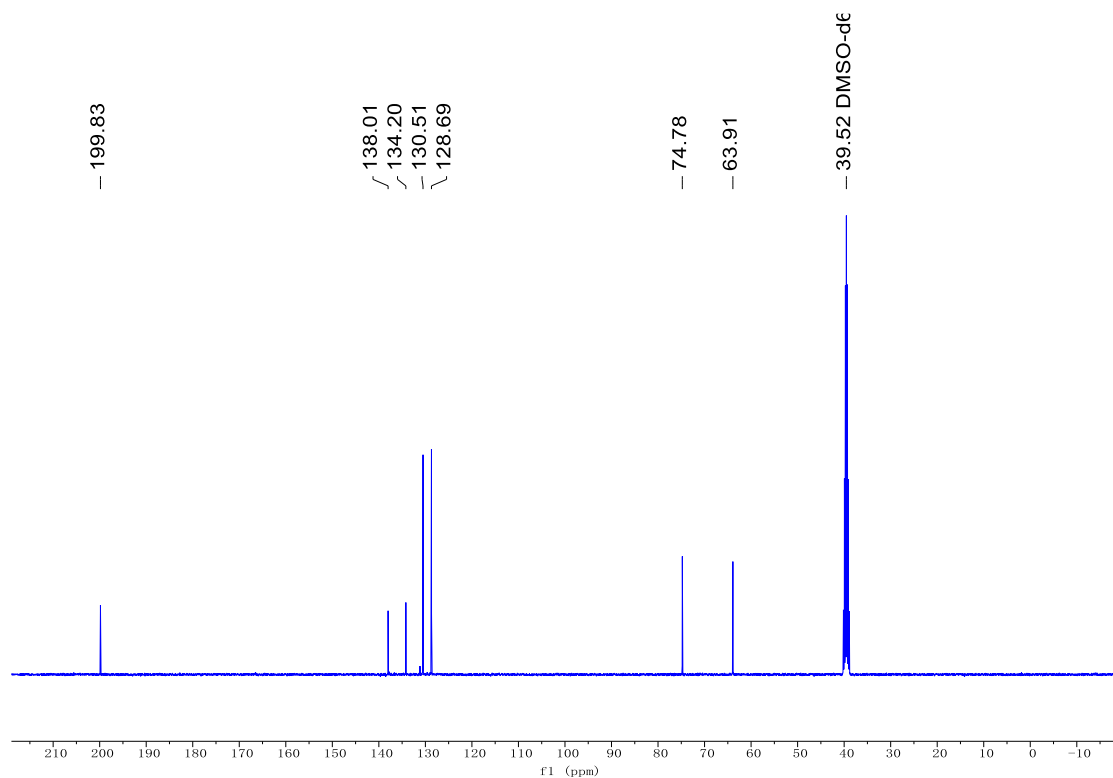

<sup>13</sup>C NMR of (R)-3g

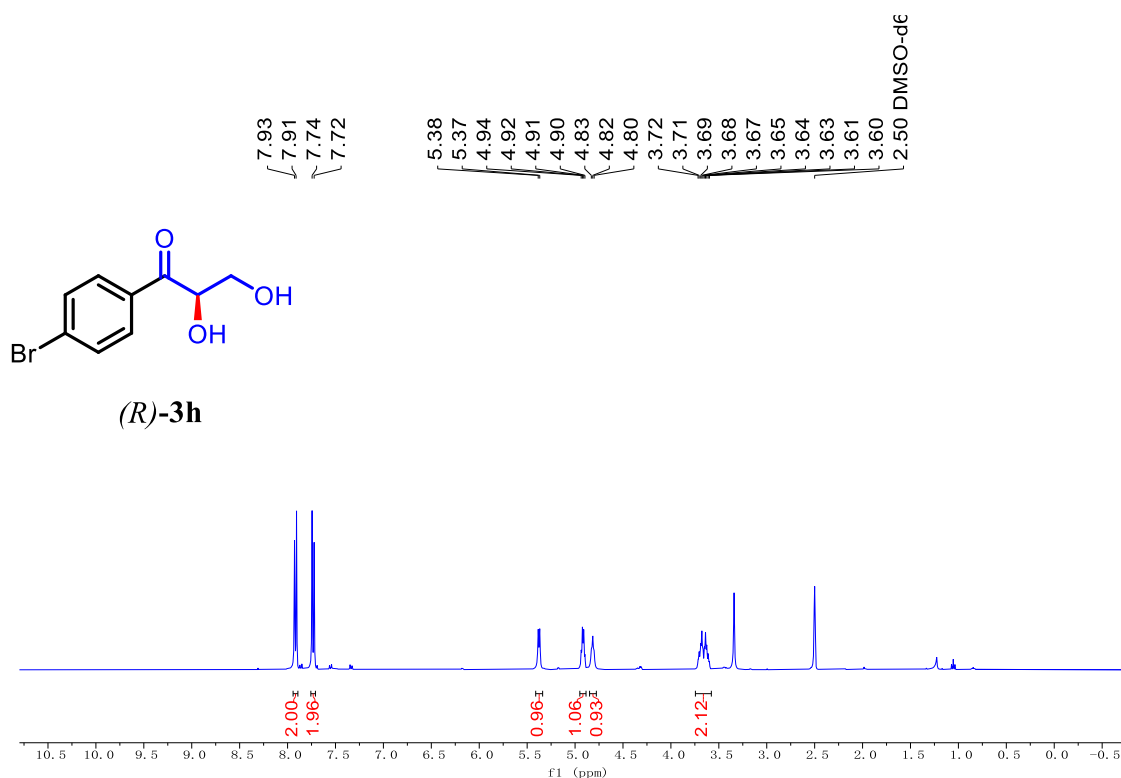

<sup>1</sup>H NMR of (R)-3h

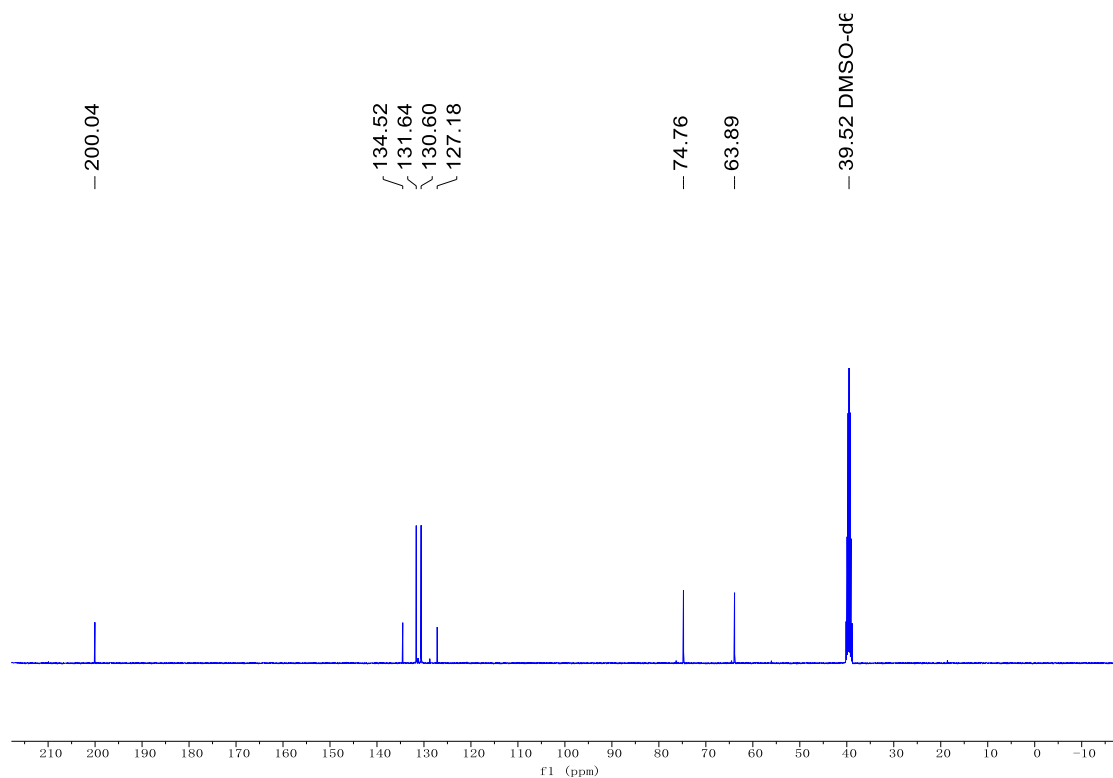

$^{13}\text{C}$  NMR of (*R*)-**3h**

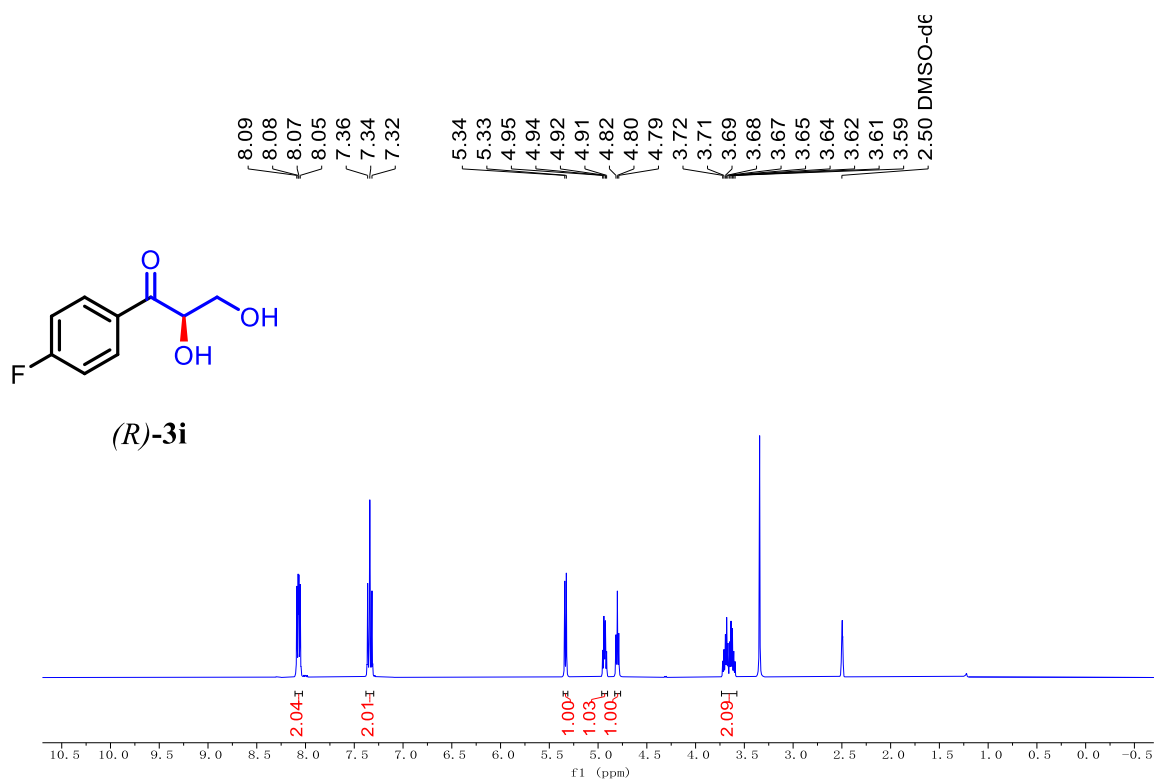

$^1\text{H}$  NMR of (*R*)-**3i**

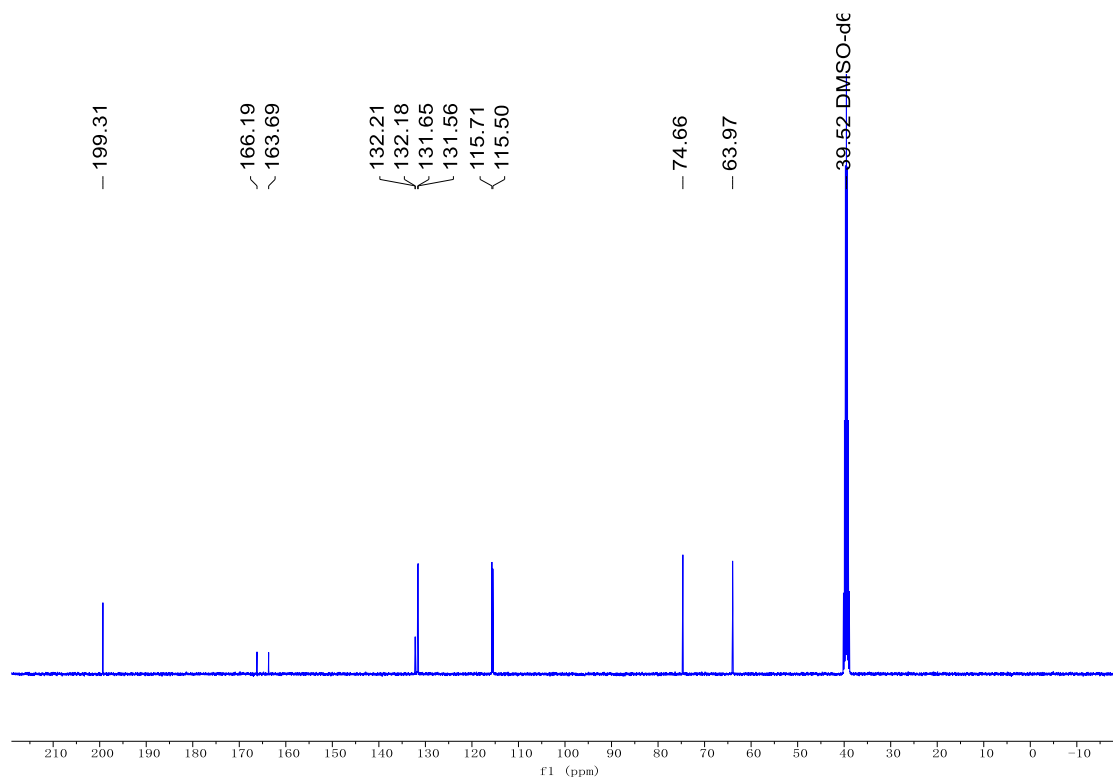

$^{13}\text{C}$  NMR of (R)-3i

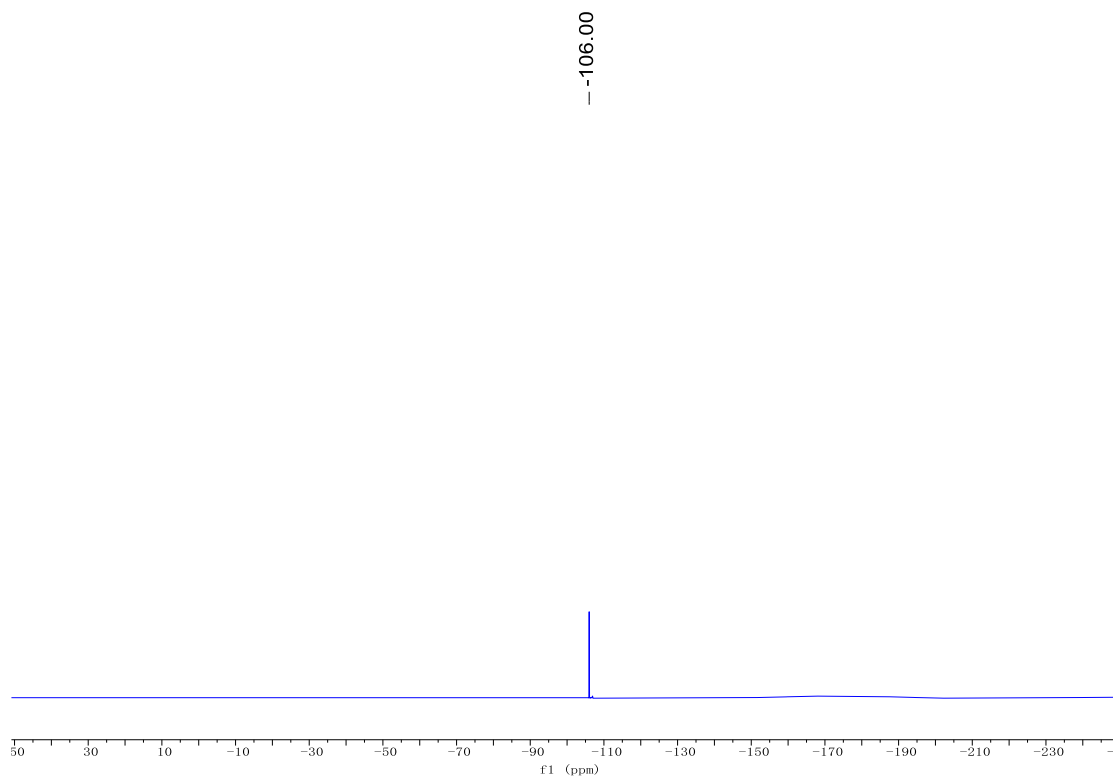

$^{19}\text{F}$  NMR of (R)-3i

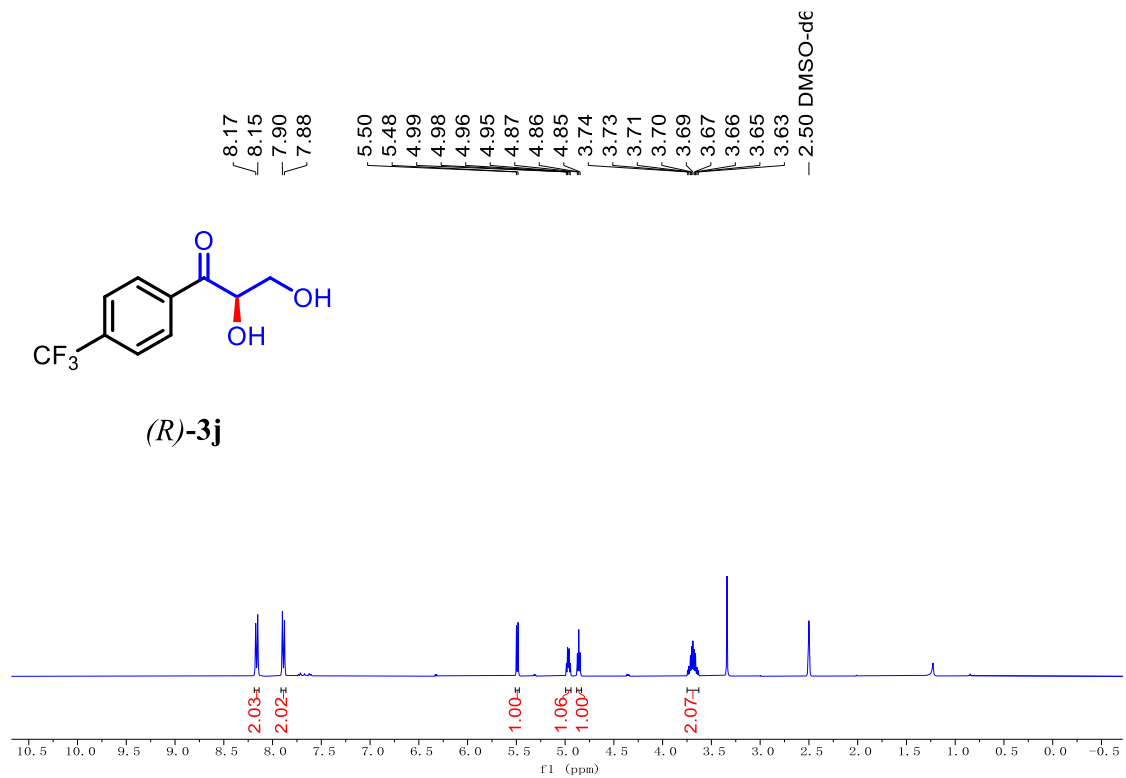

$^1\text{H}$  NMR of **(R)-3j**

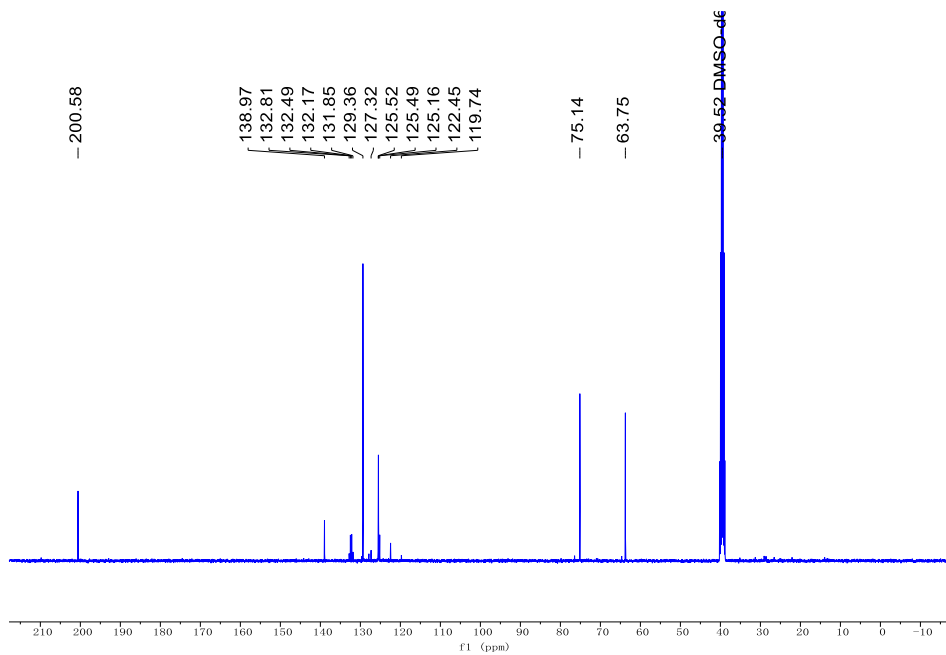

$^{13}\text{C}$  NMR of **(R)-3j**

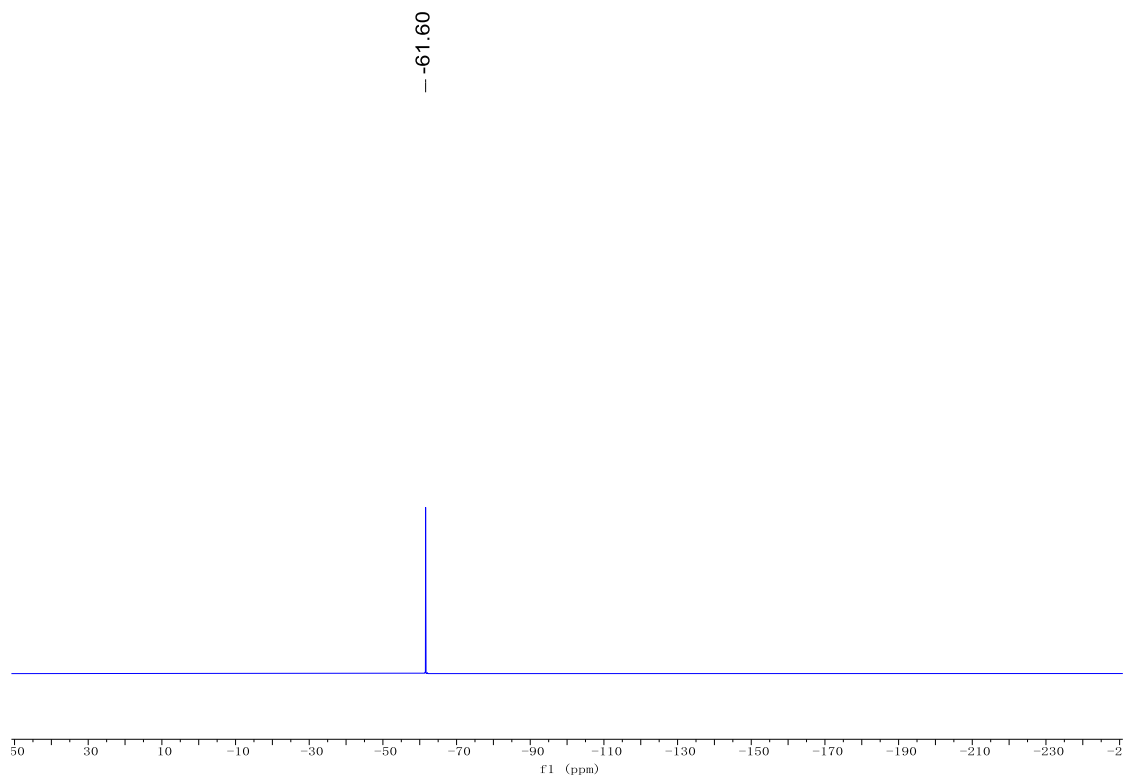

<sup>19</sup>F NMR of (R)-3j

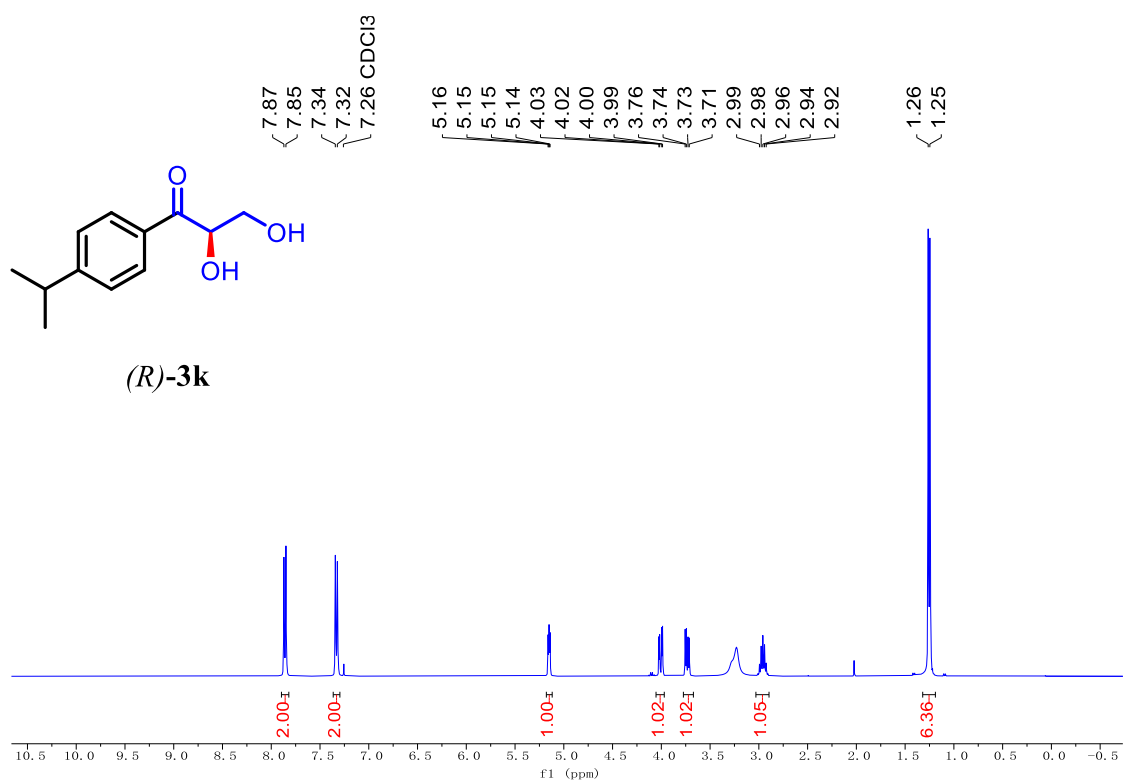

<sup>1</sup>H NMR of (R)-3k

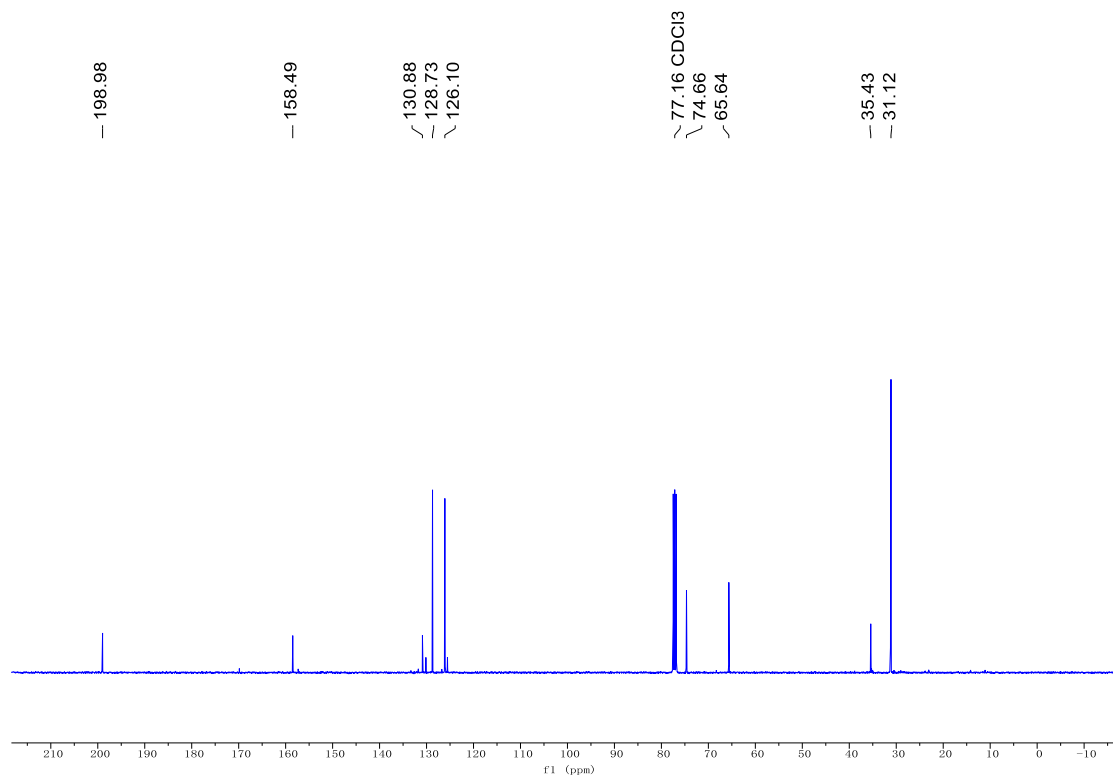

<sup>13</sup>C NMR of (R)-3k

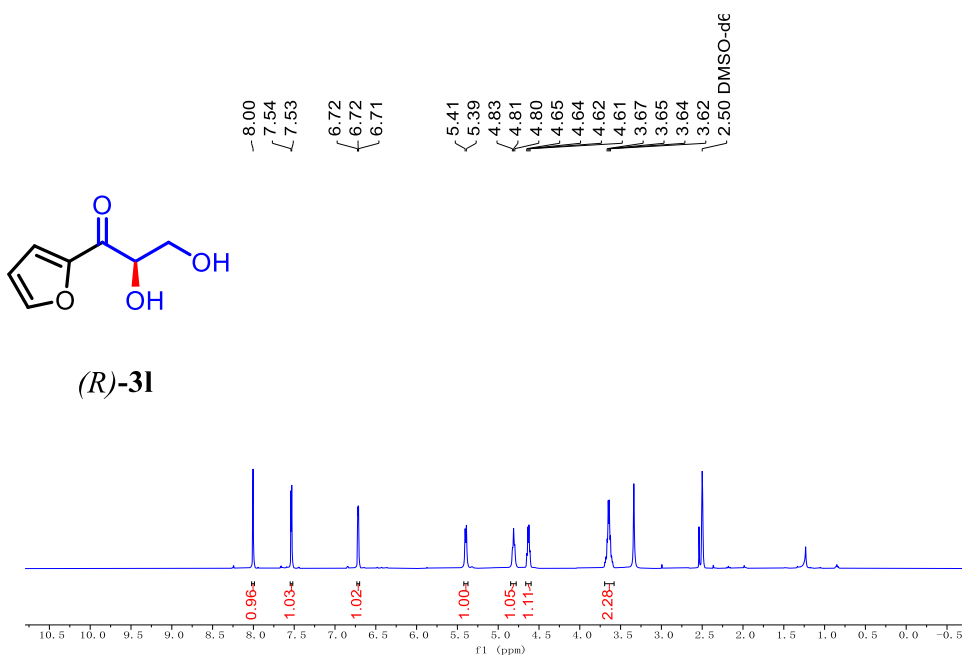

(R)-31

<sup>1</sup>H NMR of (R)-31

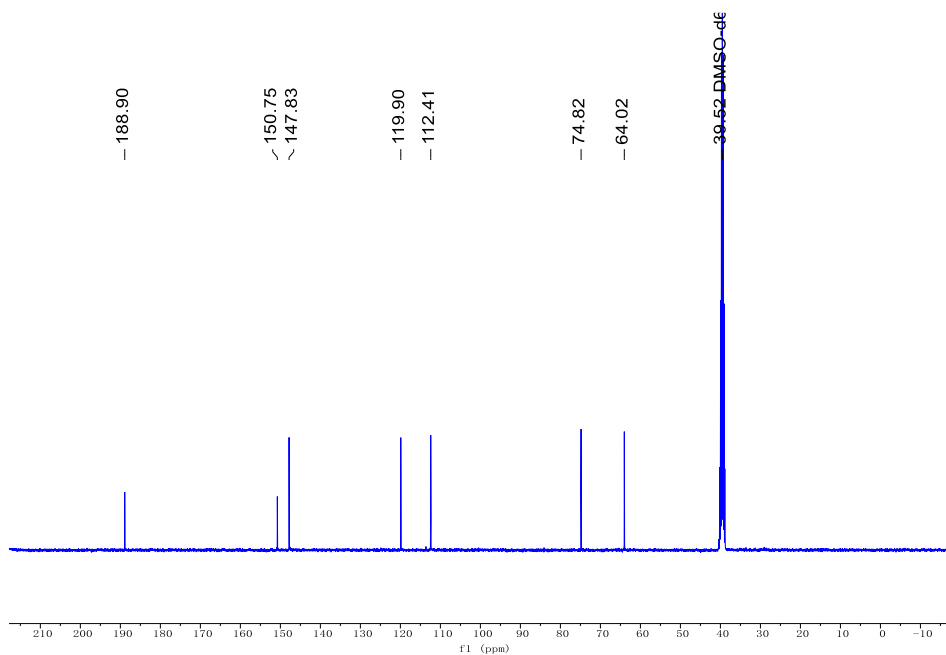

<sup>13</sup>C NMR of (R)-3I

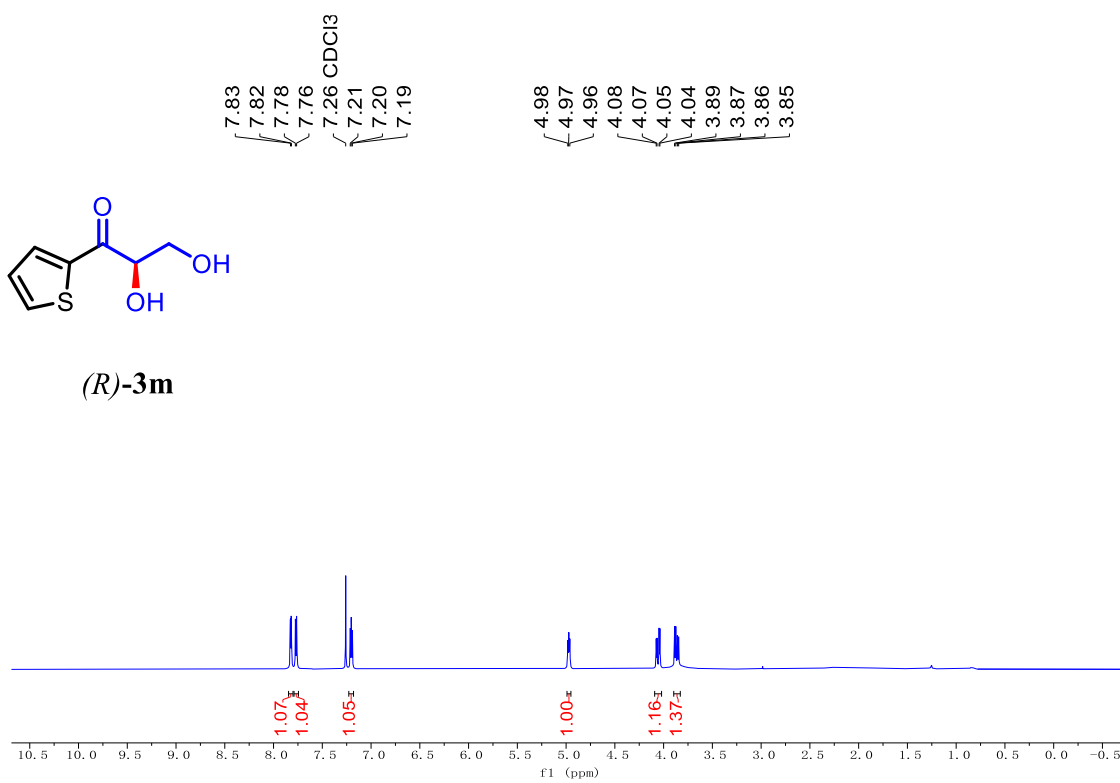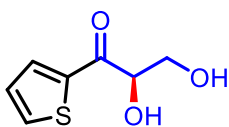

(R)-3m

<sup>1</sup>H NMR of (R)-3m

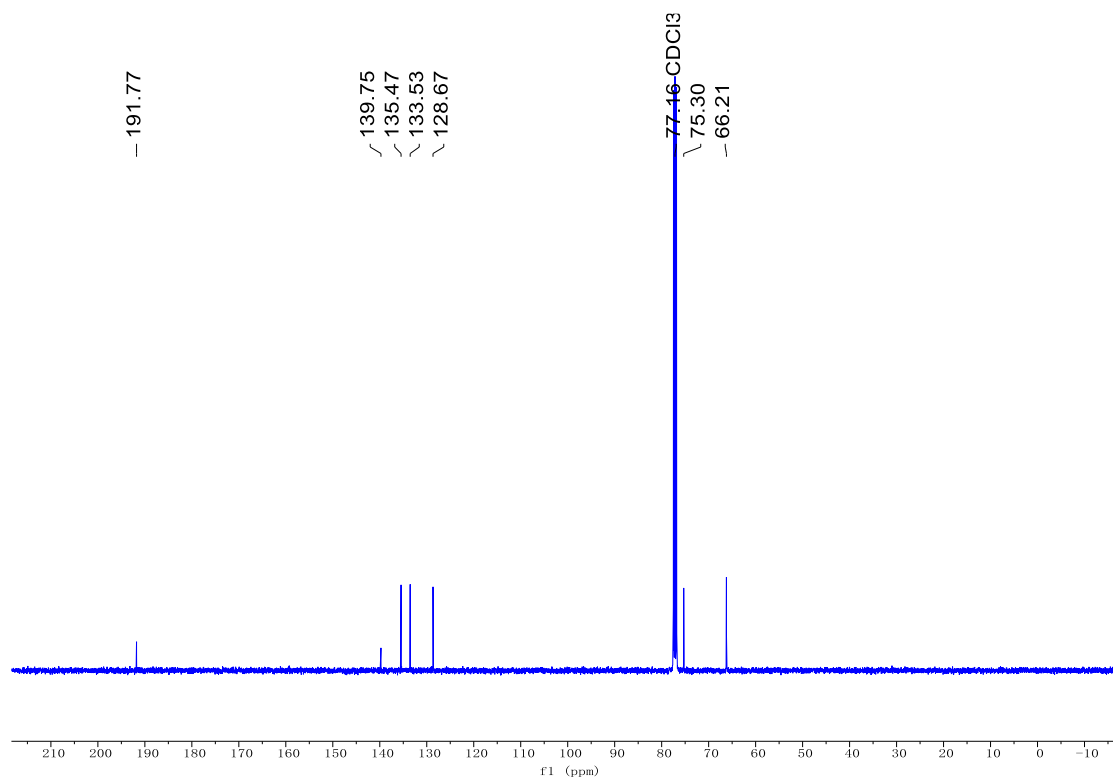

<sup>13</sup>C NMR of (R)-3m

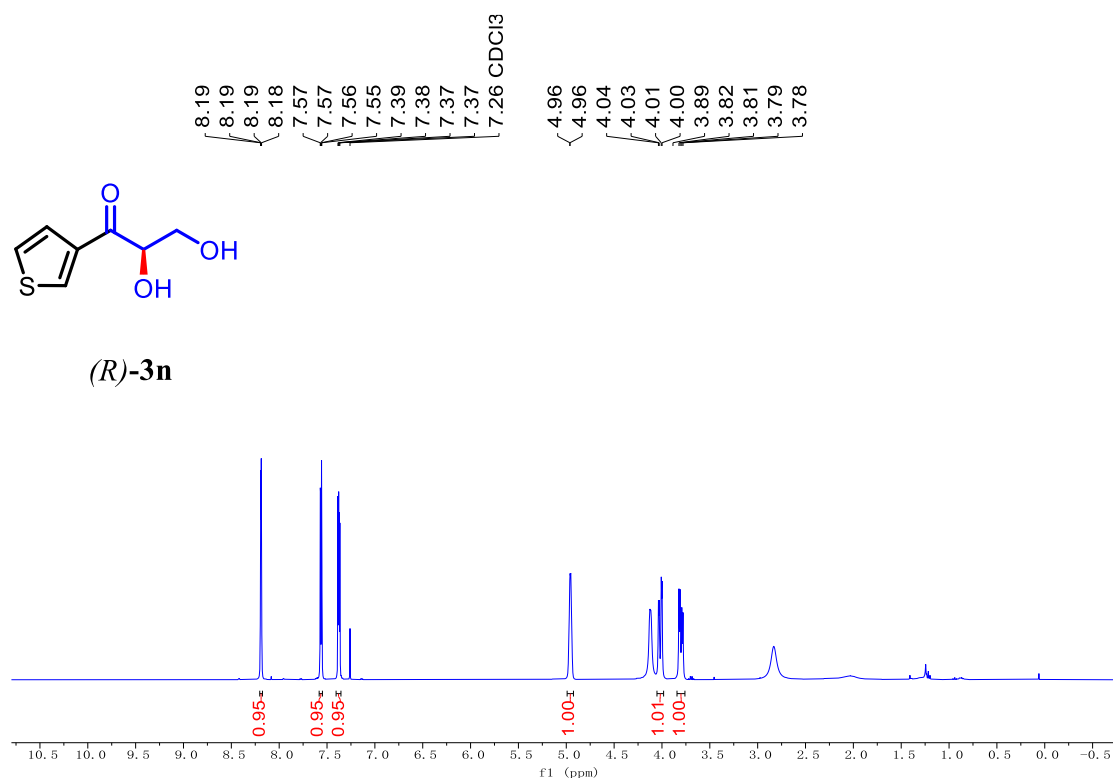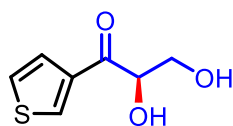

(R)-3m

<sup>1</sup>H NMR of (R)-3m

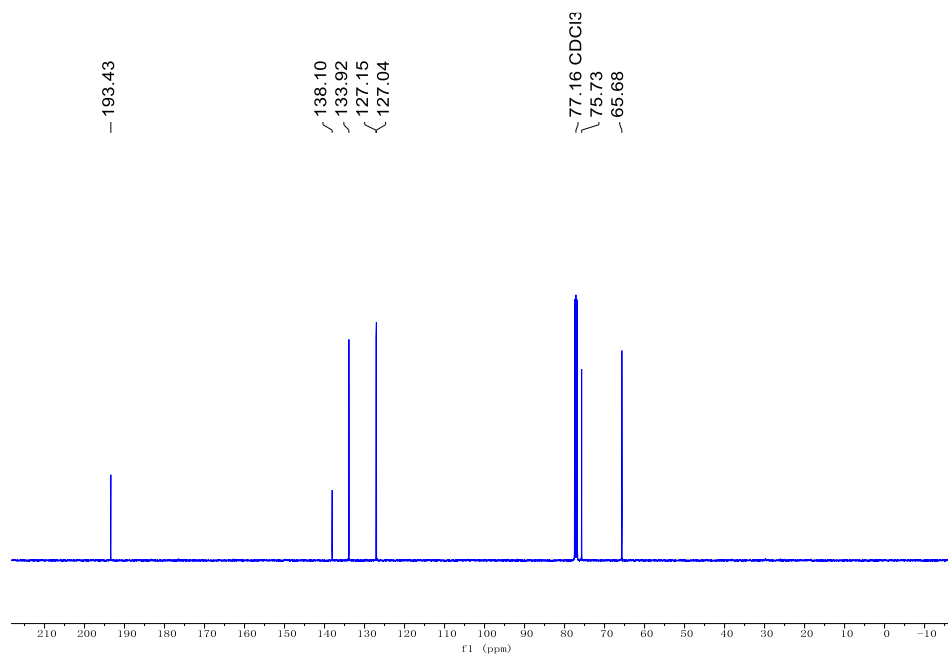

<sup>13</sup>C NMR of (R)-3n

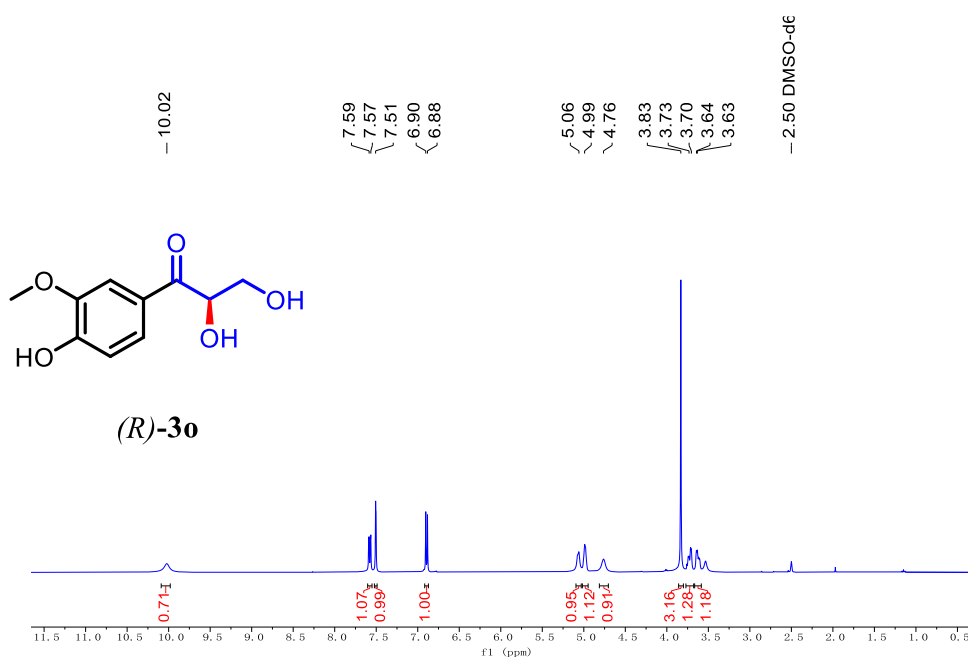

<sup>1</sup>H NMR of (R)-3o

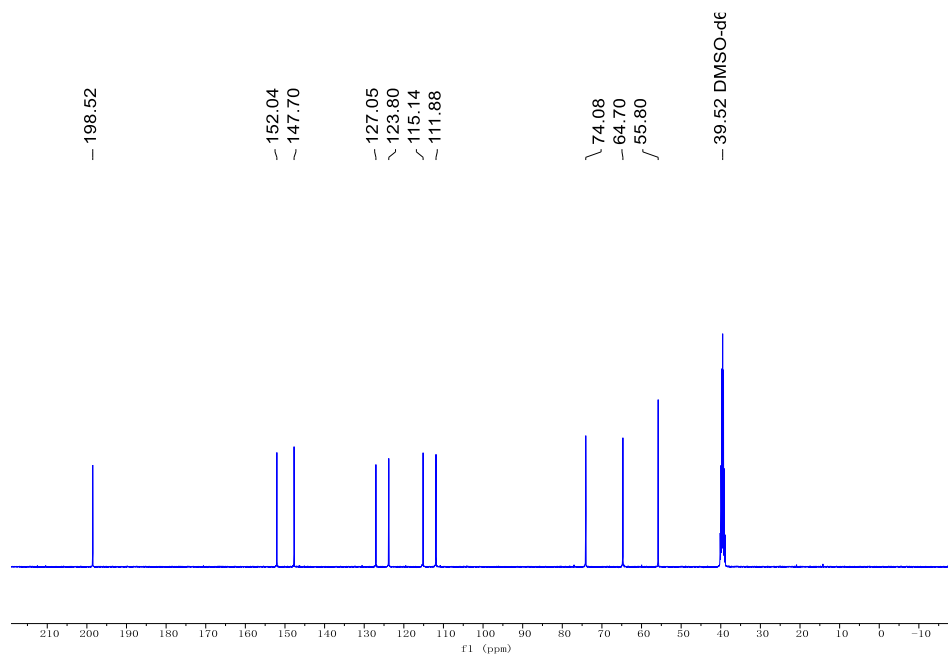

<sup>13</sup>C NMR of (R)-3o

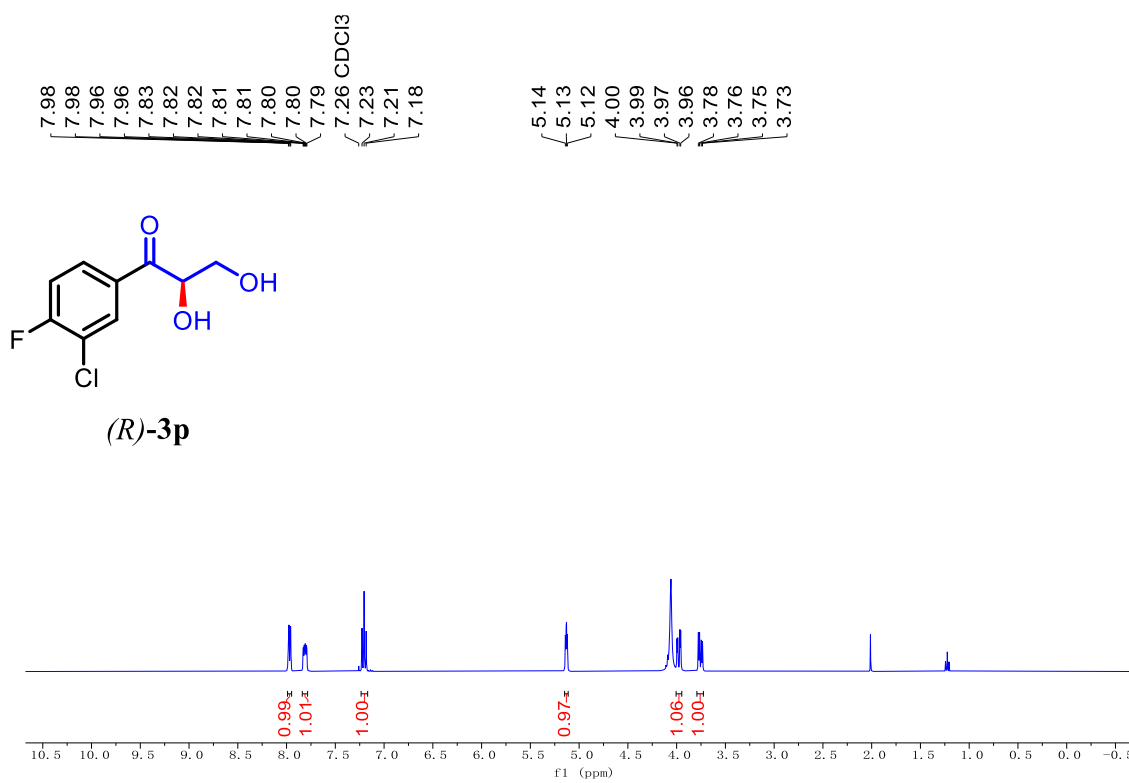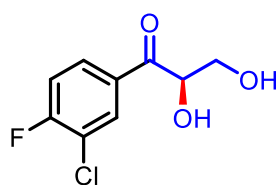

(R)-3p

<sup>1</sup>H NMR of (R)-3p

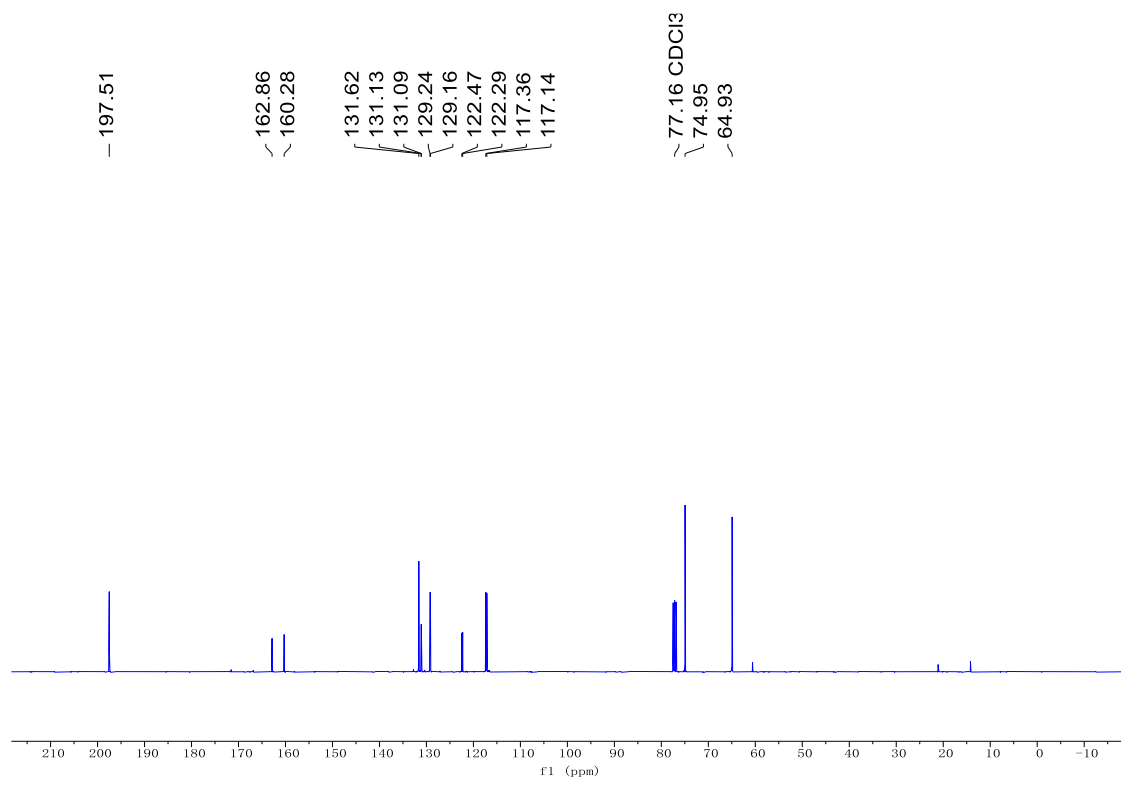

<sup>13</sup>C NMR of (*R*)-**3p**

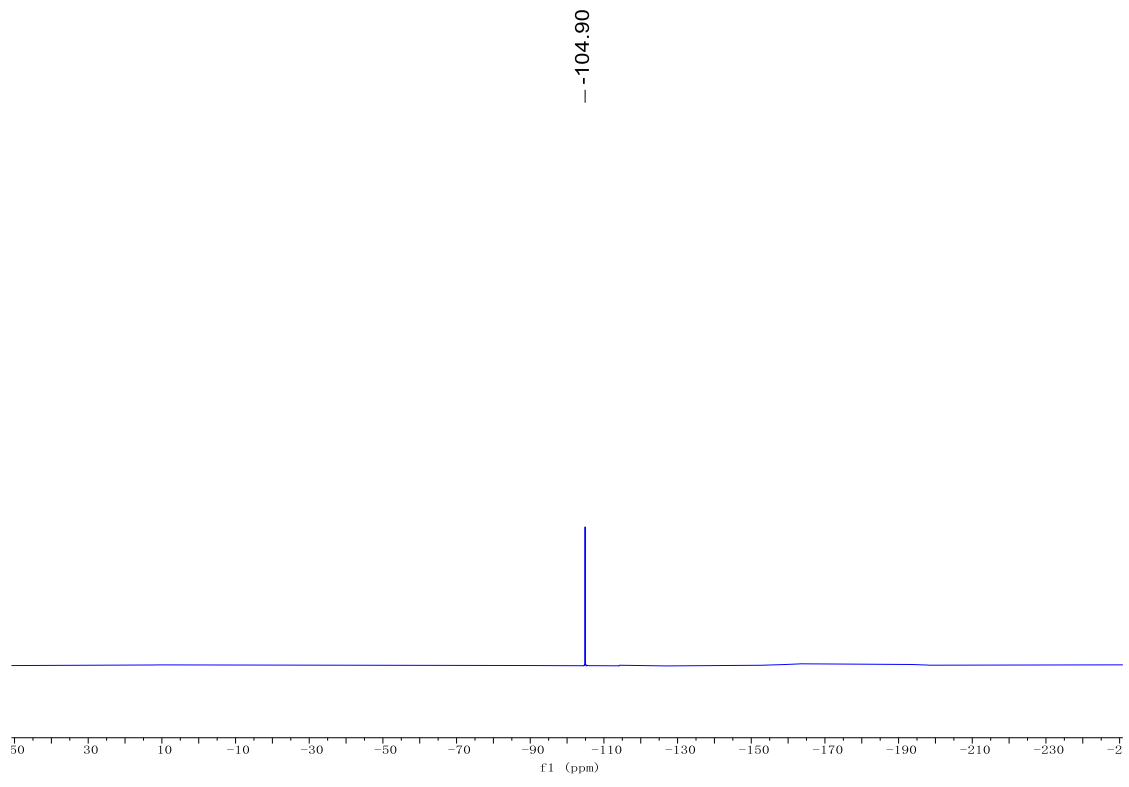

<sup>19</sup>F NMR of (*R*)-**3p**

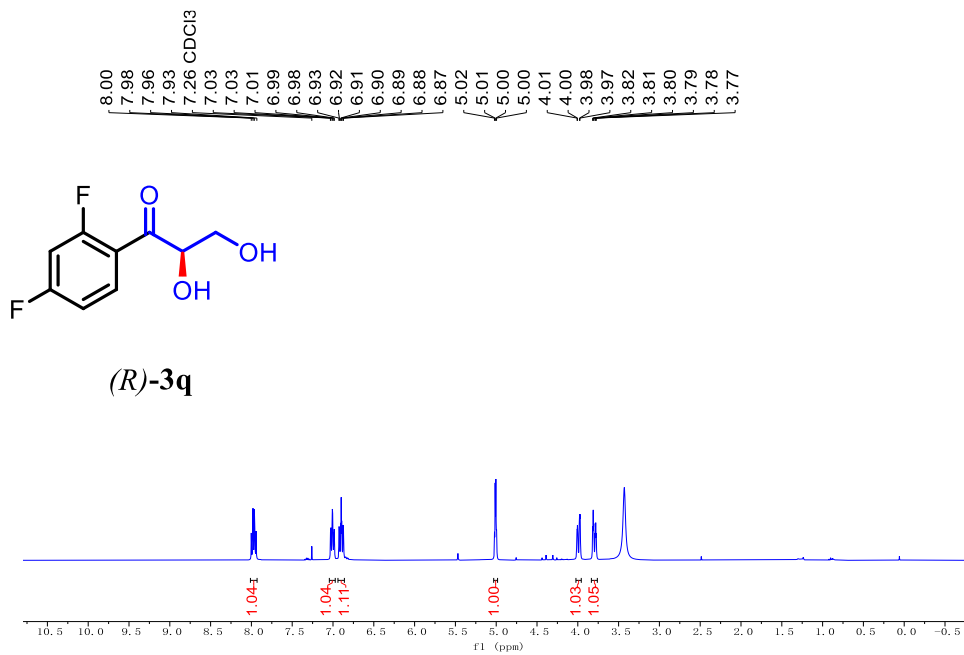

$^1\text{H}$  NMR of **(R)-3q**

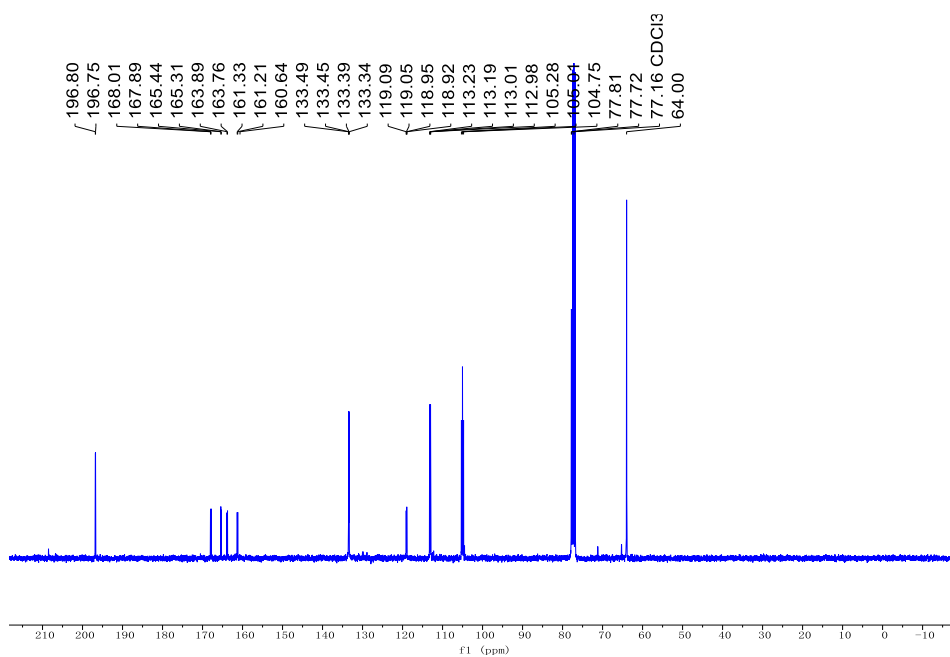

$^{13}\text{C}$  NMR of **(R)-3q**

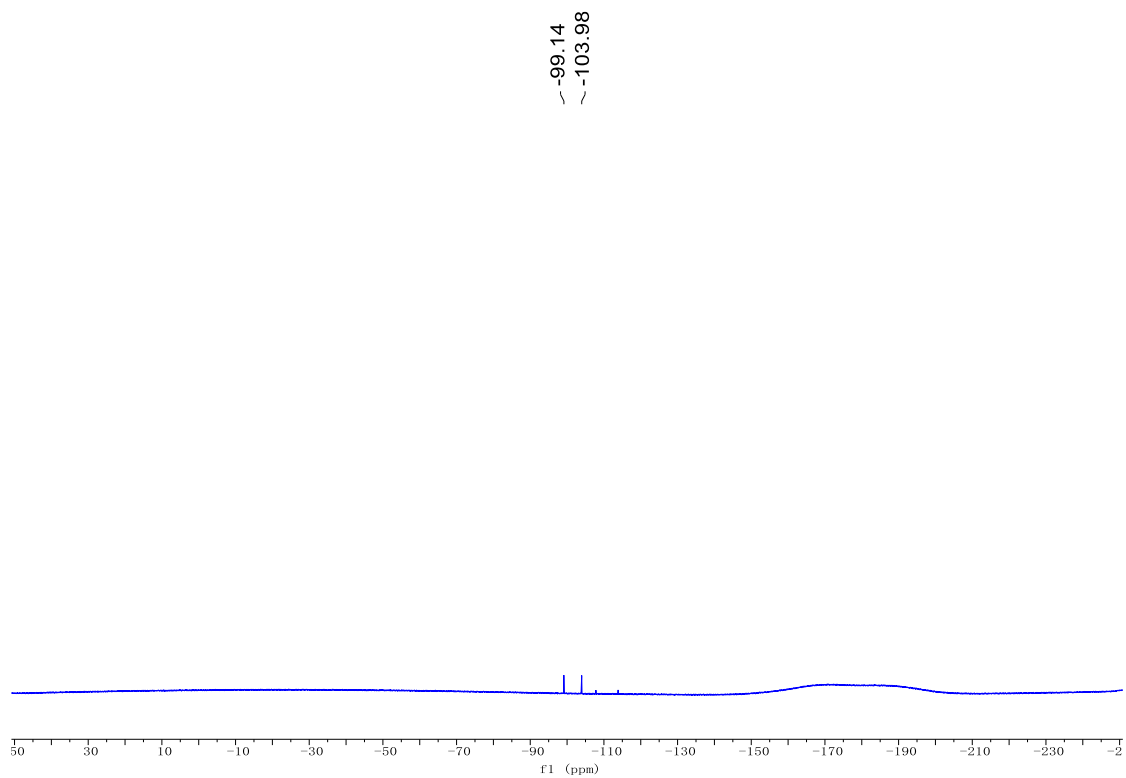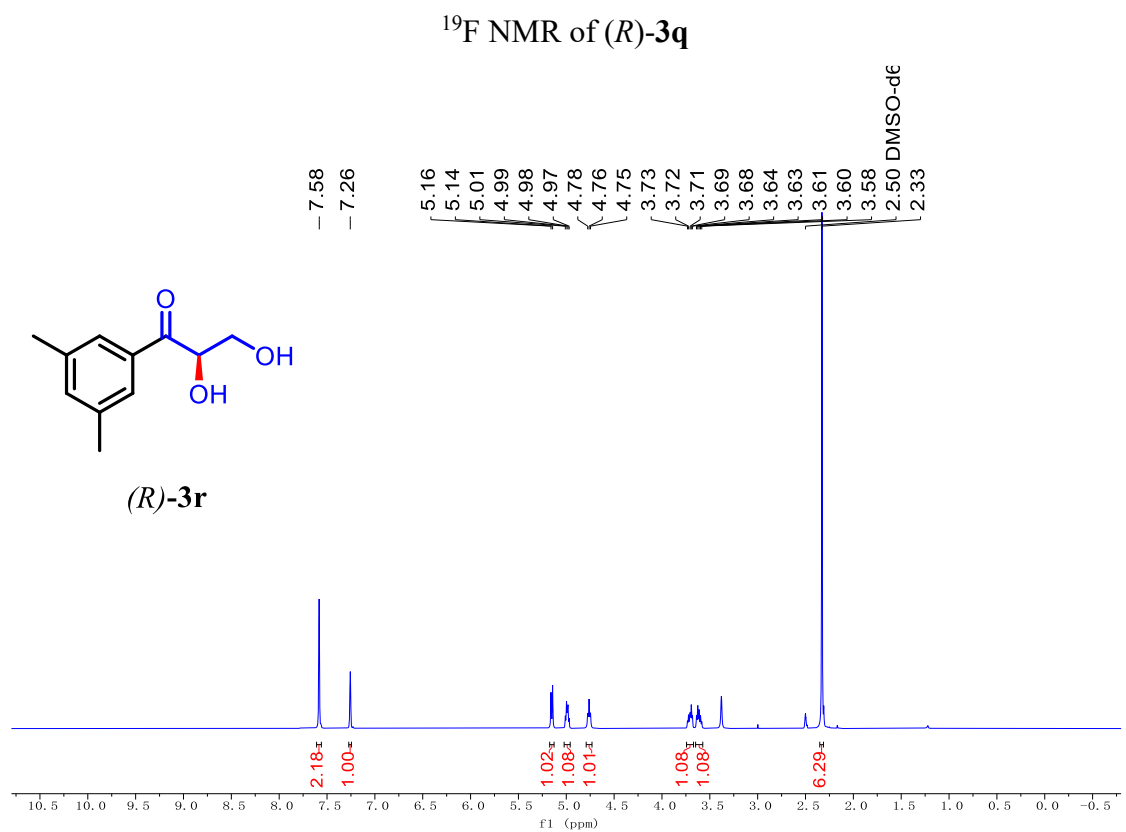

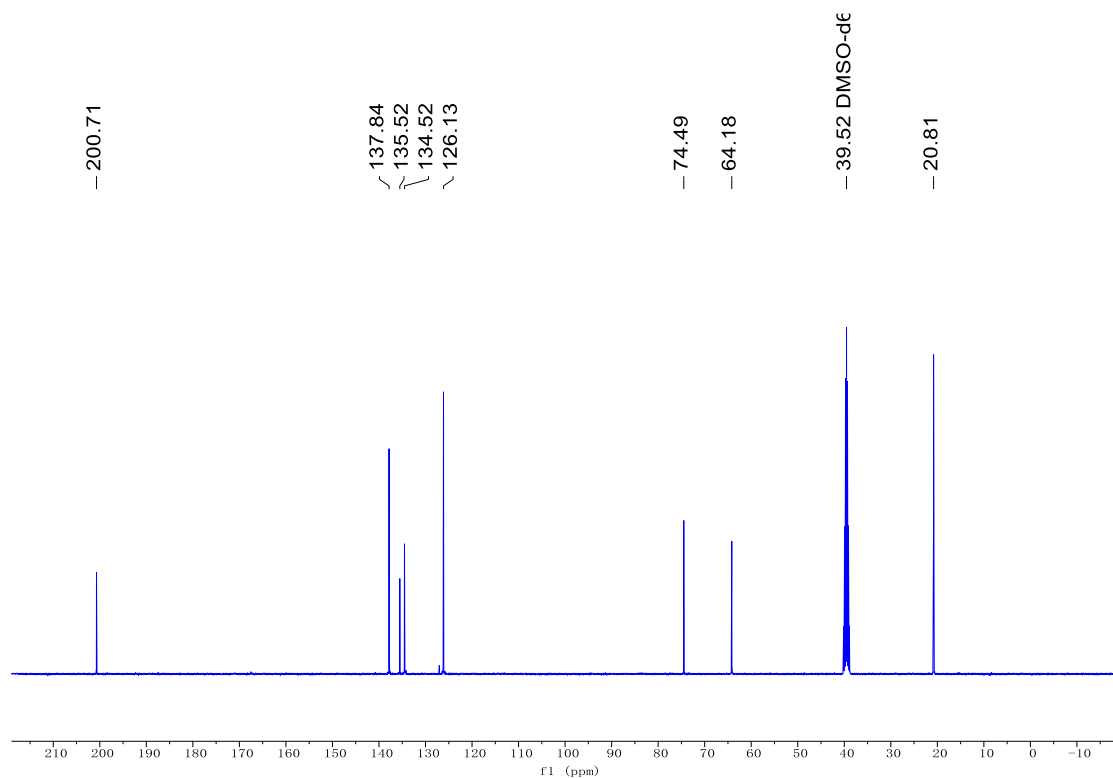

$^{13}\text{C}$  NMR of *(R)*-3r

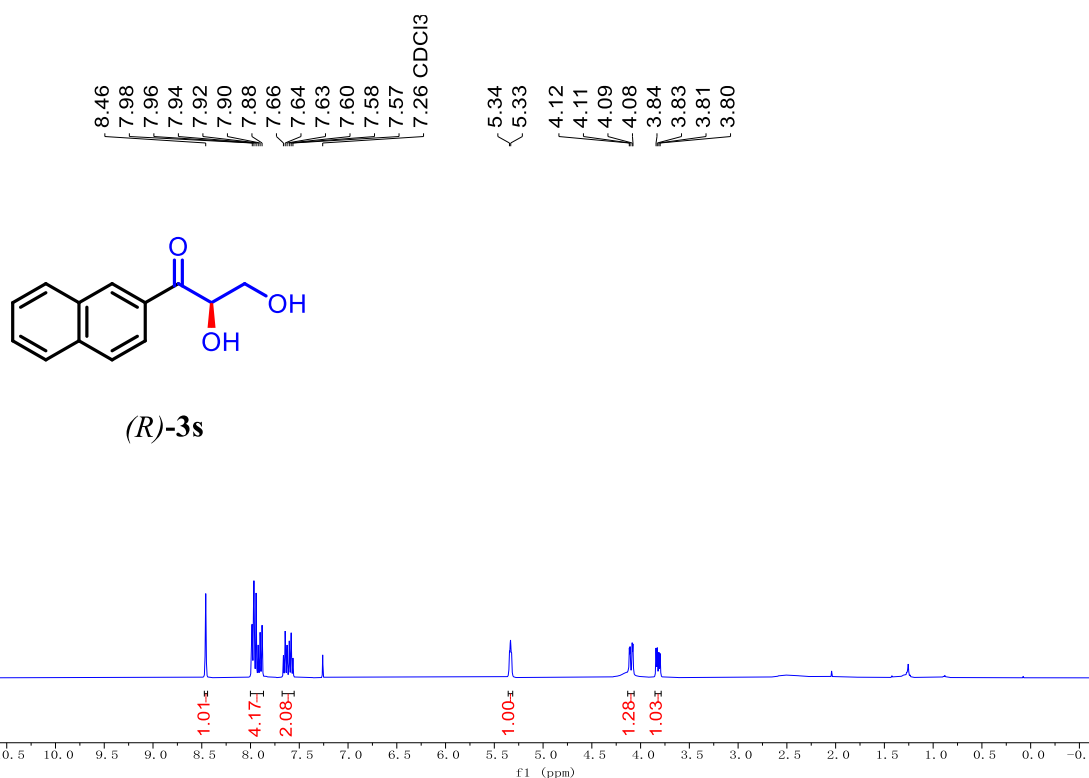

*(R)*-3s

$^1\text{H}$  NMR of *(R)*-3s

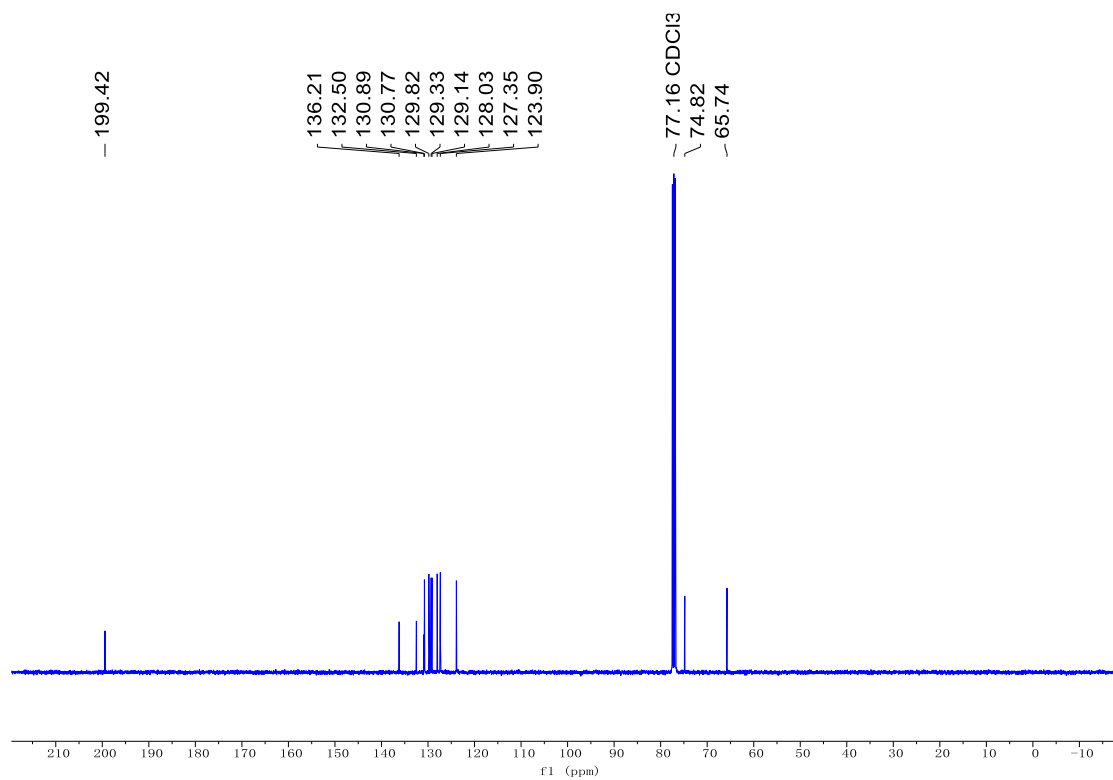

$^{13}\text{C}$  NMR of *(R)*-3s

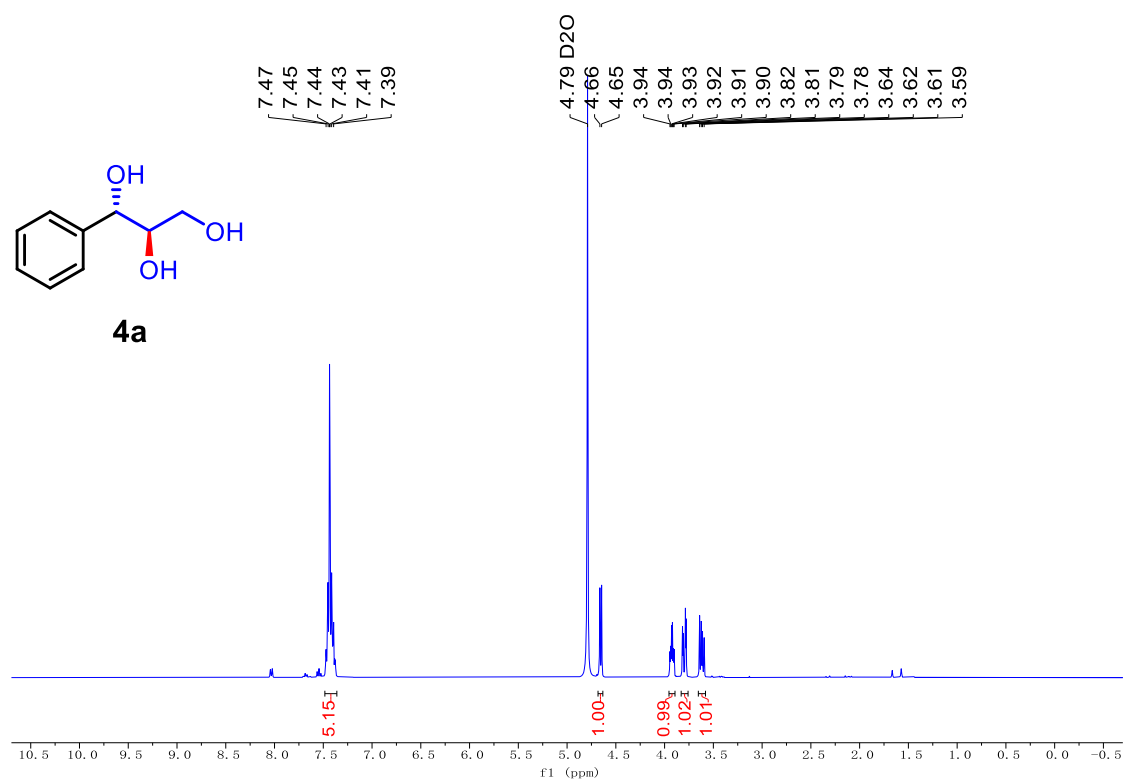

$^1\text{H}$  NMR of **4a**

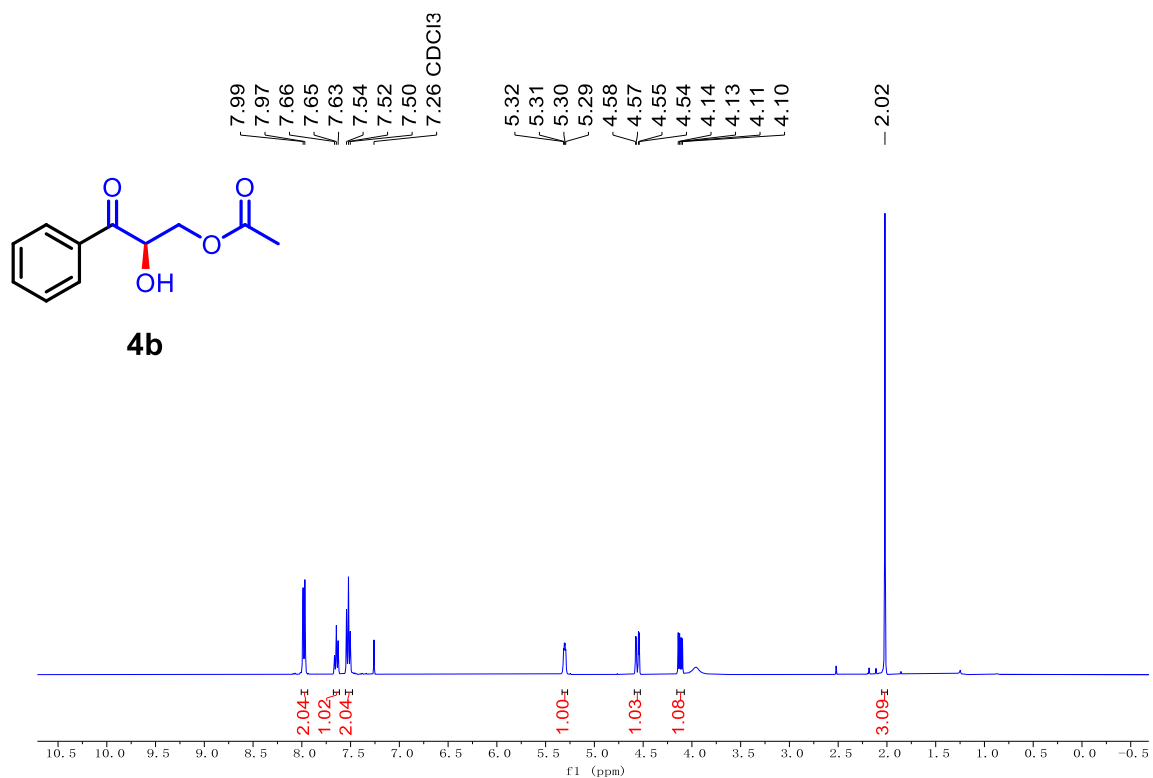

<sup>1</sup>H NMR of **4b**

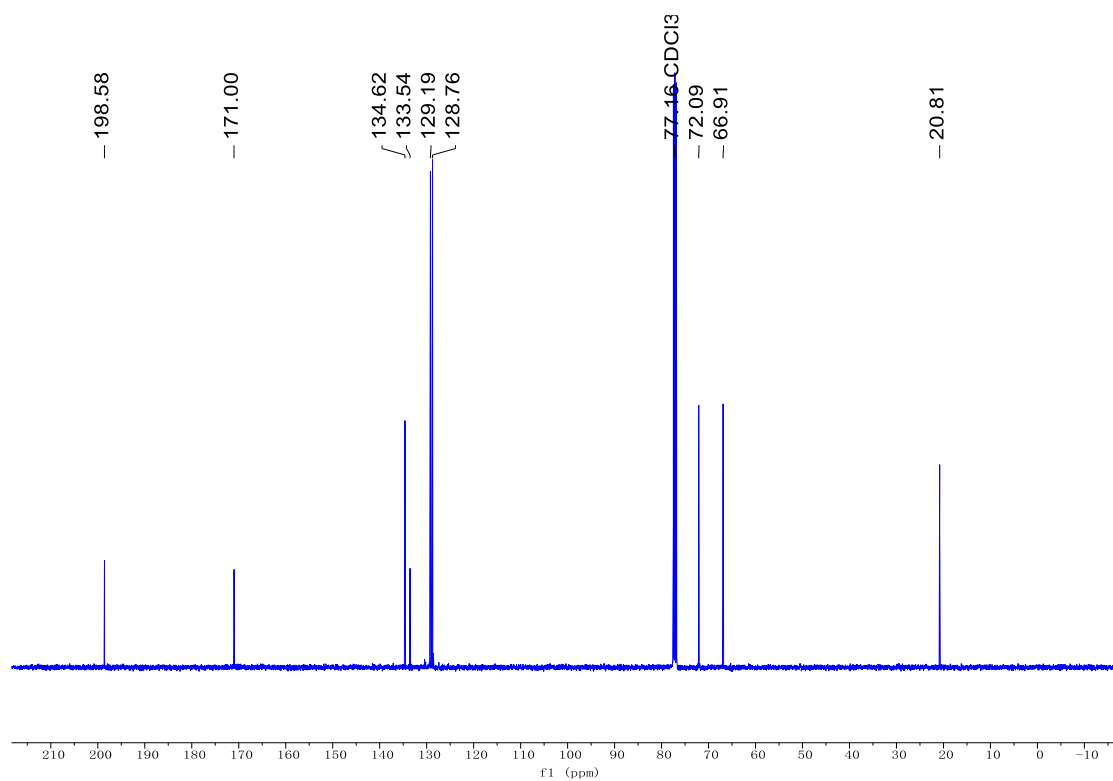

<sup>13</sup>C NMR of **4b**

## 19. HPLC Spectra of chiral compounds

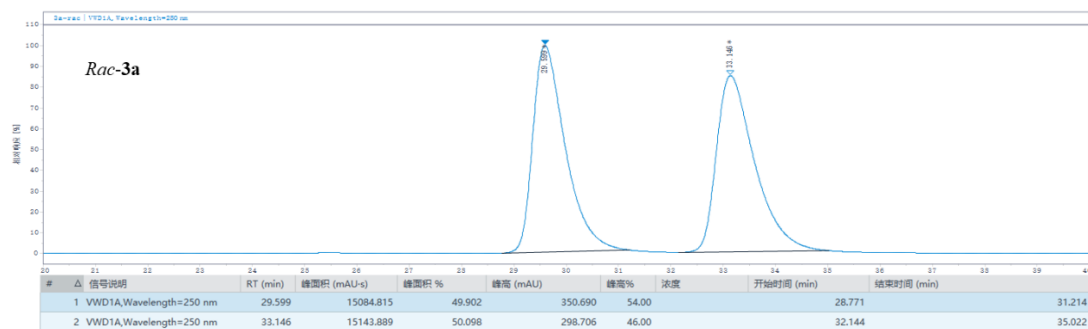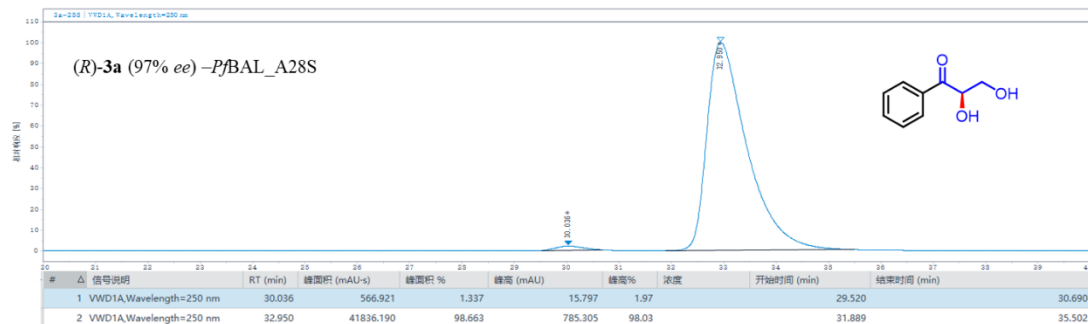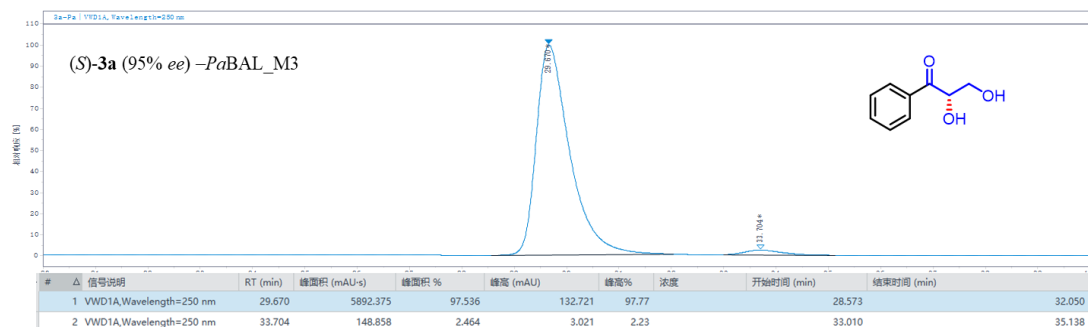

HPLC chromatogram of racemate of 2,3-dihydroxy-1-phenylpropan-1-one (**3a**), products of *PfBAL\_A28S* ((*R*)-**3a**) and *PaBAL M3* ((*S*)-**3a**). HPLC conditions: DAICEL IA (*n*-hexane: *i*-PrOH = 95:5, Flow rate = 0.8 mL/min, UV = 250 nm):  $t_{R-major} = 32.950$  min (*PfBAL\_A28S*) and  $t_{R-major} = 29.670$  min (*PaBAL M3*).

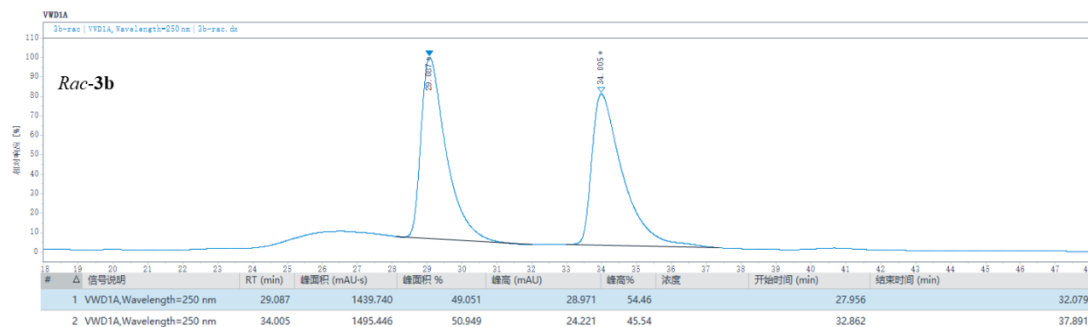

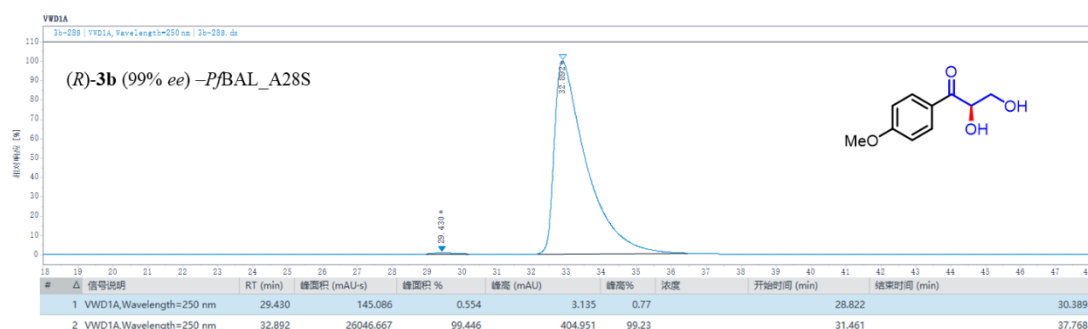

HPLC chromatogram of racemate of 2,3-dihydroxy-1-(4-methoxyphenyl)propan-1-one(**3b**), products of *Pf*BAL\_A28S: ((*R*)-**3b**). HPLC conditions: DAICEL IA (*n*-hexane: *i*-PrOH = 90:10, Flow rate = 0.8 mL/min, UV = 250 nm):  $t_{R-major} = 32.892$  min (*Pf*BAL\_A28S).

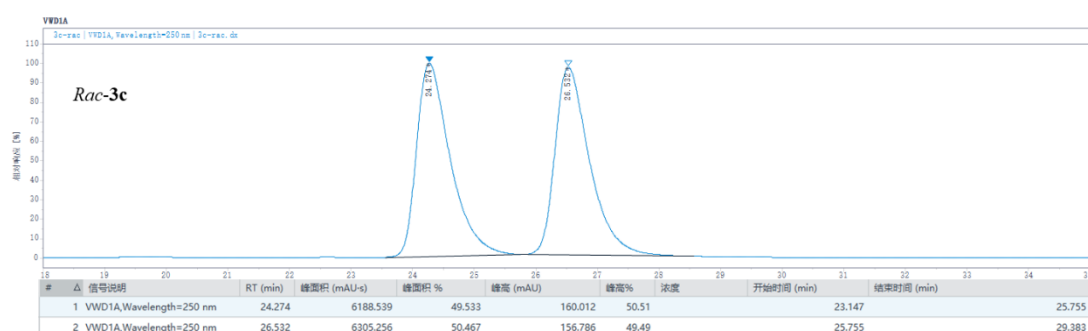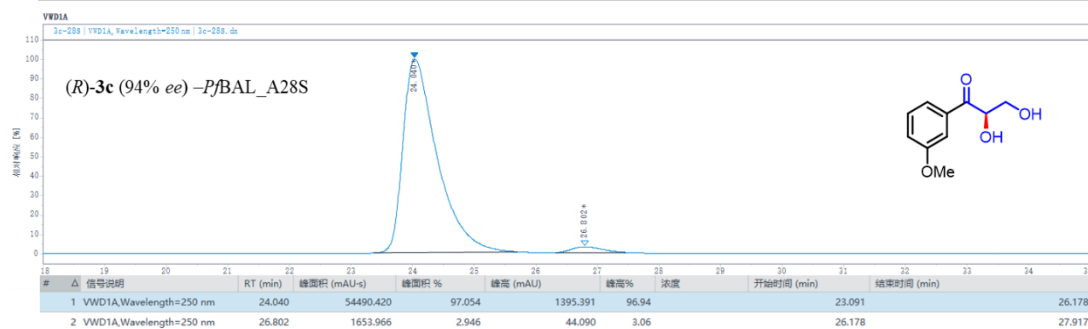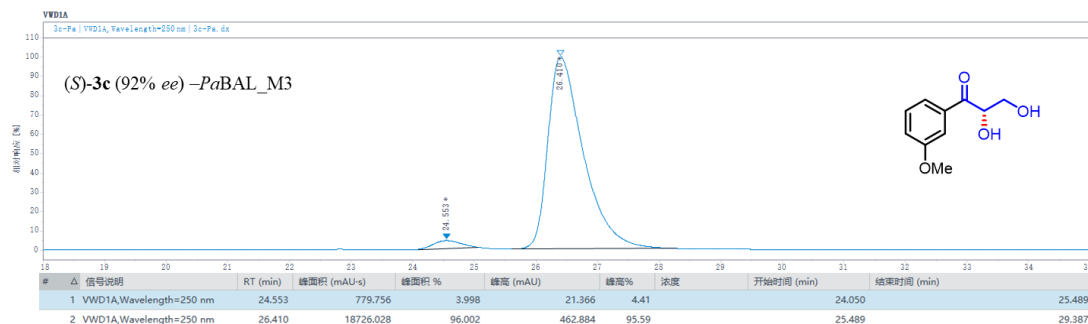

HPLC chromatogram of racemate of 2,3-dihydroxy-1-(3-methoxyphenyl)propan-1-one(**3c**), products of *Pf*BAL\_A28S ((*R*)-**3c**) and *Pa*BAL M3 ((*S*)-**3c**). HPLC conditions: DAICEL IA (*n*-hexane: *i*-PrOH = 90:10, Flow rate = 0.8 mL/min, UV = 250 nm):  $t_{R-major} = 24.040$  min (*Pf*BAL\_A28S) and  $t_{R-major} = 26.410$  min (*Pa*BAL M3).

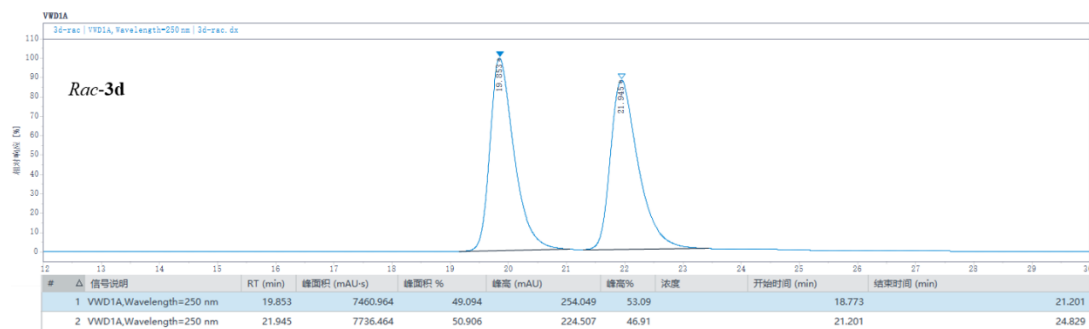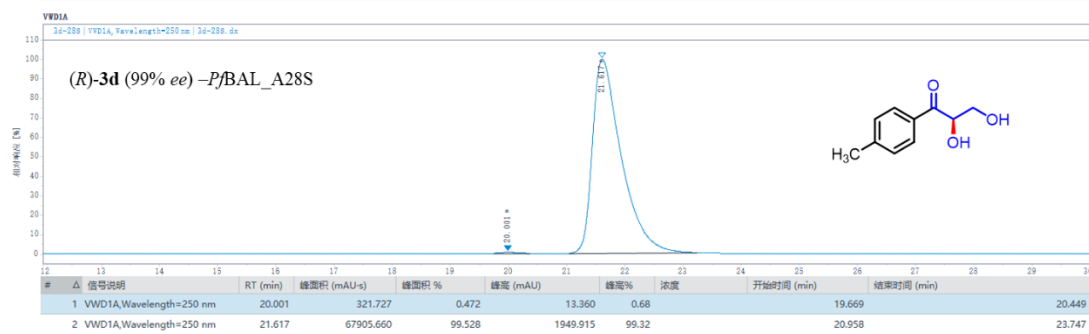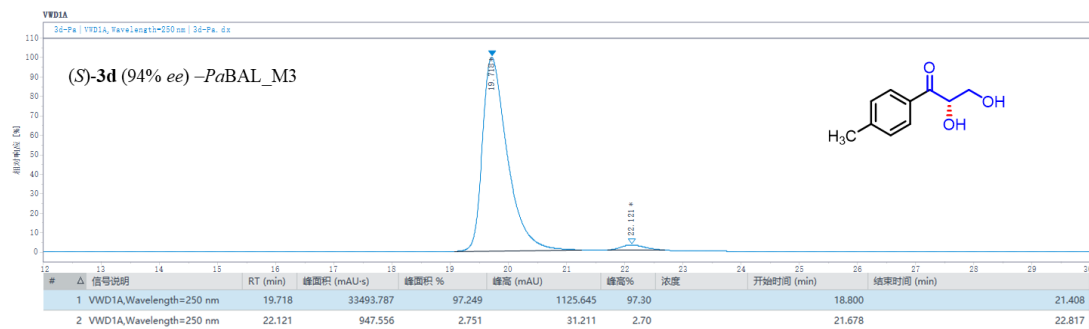

HPLC chromatogram of racemate of Products of *PfBAL\_A28S* ((*R*)-**3d**) and *PaBAL M3* ((*S*)-**3d**). HPLC conditions: DAICEL IA (*n*-hexane: *i*-PrOH = 90:10, Flow rate = 0.8 mL/min, UV = 250 nm):  $t_{R-major} = 21.617$  min (*PfBAL\_A28S*) and  $t_{R-major} = 19.718$  min (*PaBAL M3*).

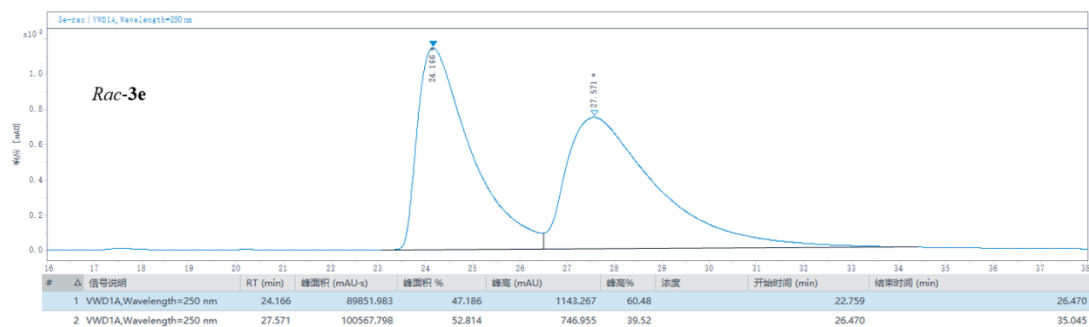

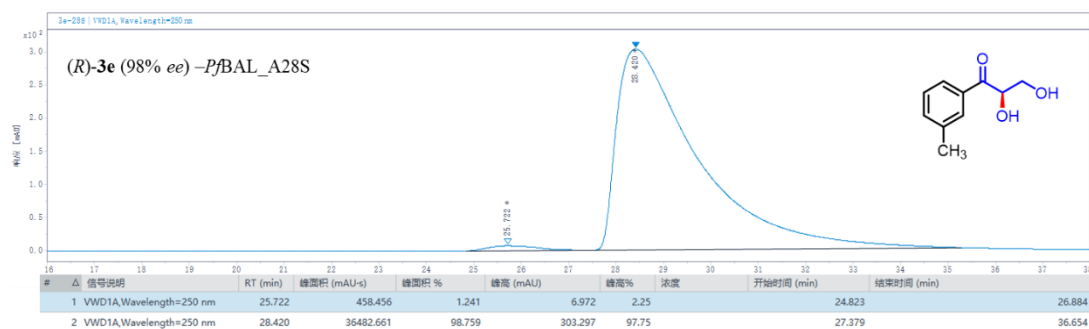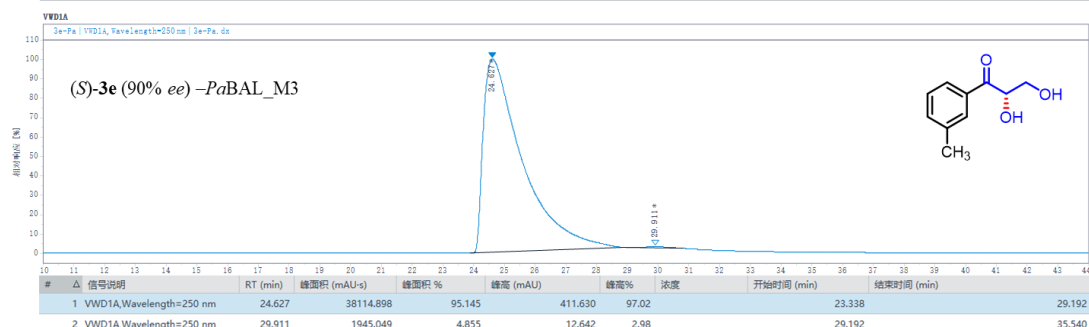

HPLC chromatogram of racemate of 2,3-dihydroxy-1-(*m*-tolyl)propan-1-one (**3e**), products of P<sub>f</sub>BAL\_A28S ((*R*)-**3e**) and P<sub>a</sub>BAL M3 ((*S*)-**3e**). HPLC conditions: DAICEL OD-H (*n*-hexane: *i*-PrOH = 95:5, Flow rate = 0.8 mL/min, UV = 250 nm): t<sub>R-major</sub> = 28.420 min (P<sub>f</sub>BAL\_A28S) and t<sub>R-major</sub> = 24.627 min (P<sub>a</sub>BAL M3).

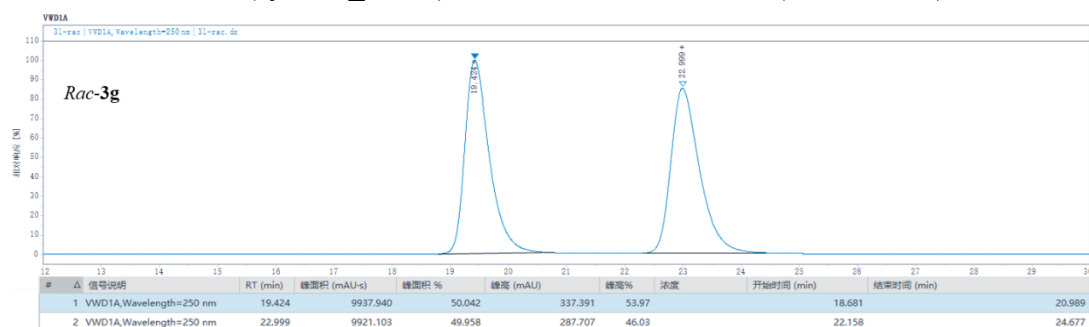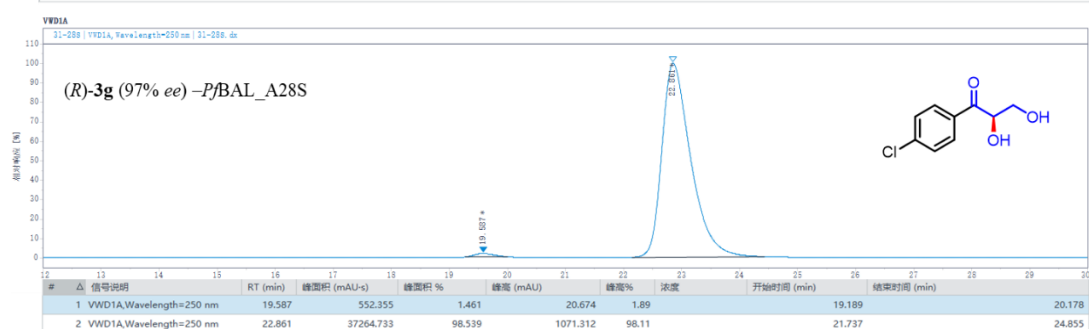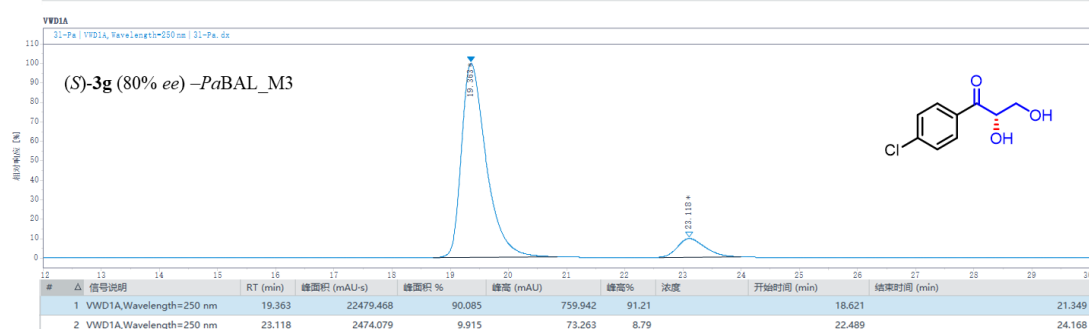

HPLC chromatogram of racemate of 1-(4-chlorophenyl)-2,3-dihydroxypropan-1-one (**3g**), products of *Pf*BAL\_A28S ((*R*)-**3g**) and *Pa*BAL M3 ((*S*)-**3g**). HPLC conditions: DAICEL IA (*n*-hexane: *i*-PrOH = 90:10, Flow rate = 0.8 mL/min, UV = 250 nm):  $t_{R-major} = 22.861$  min (*Pf*BAL\_A28S) and  $t_{R-major} = 19.363$  min (*Pa*BAL M3).

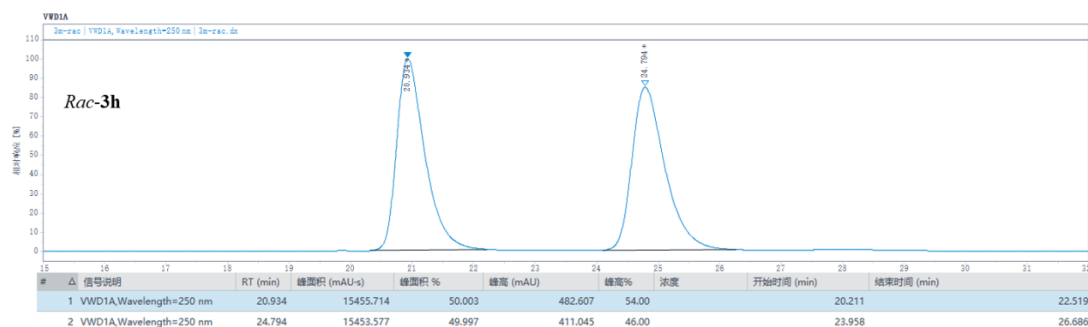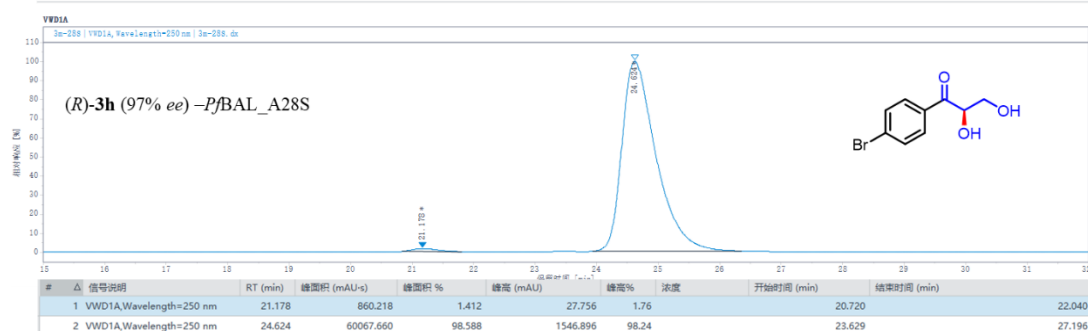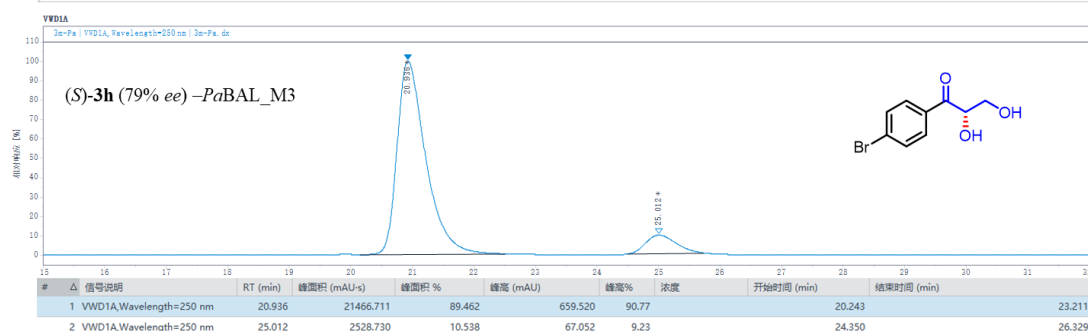

HPLC chromatogram of racemate of 1-(4-bromophenyl)-2,3-dihydroxypropan-1-one (**3h**), products of *Pf*BAL\_A28S ((*R*)-**3h**) and *Pa*BAL M3 ((*S*)-**3h**). HPLC conditions: DAICEL IA (*n*-hexane: *i*-PrOH = 90:10, Flow rate = 0.8 mL/min, UV = 250 nm):  $t_{R-major} = 24.624$  min (*Pf*BAL\_A28S) and  $t_{R-major} = 20.936$  min (*Pa*BAL M3).

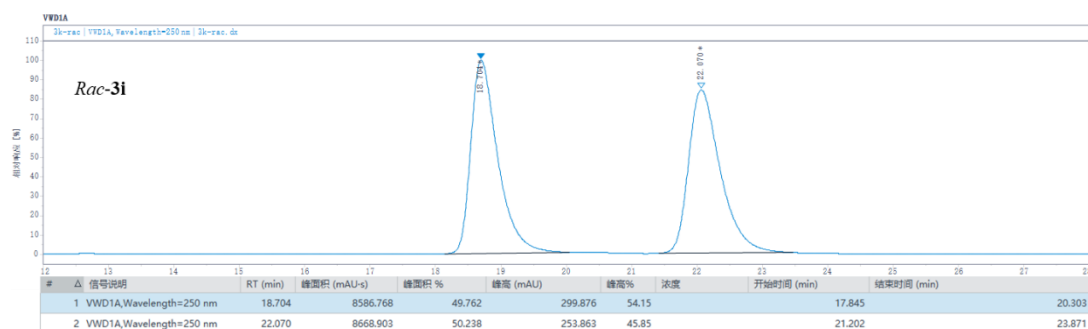

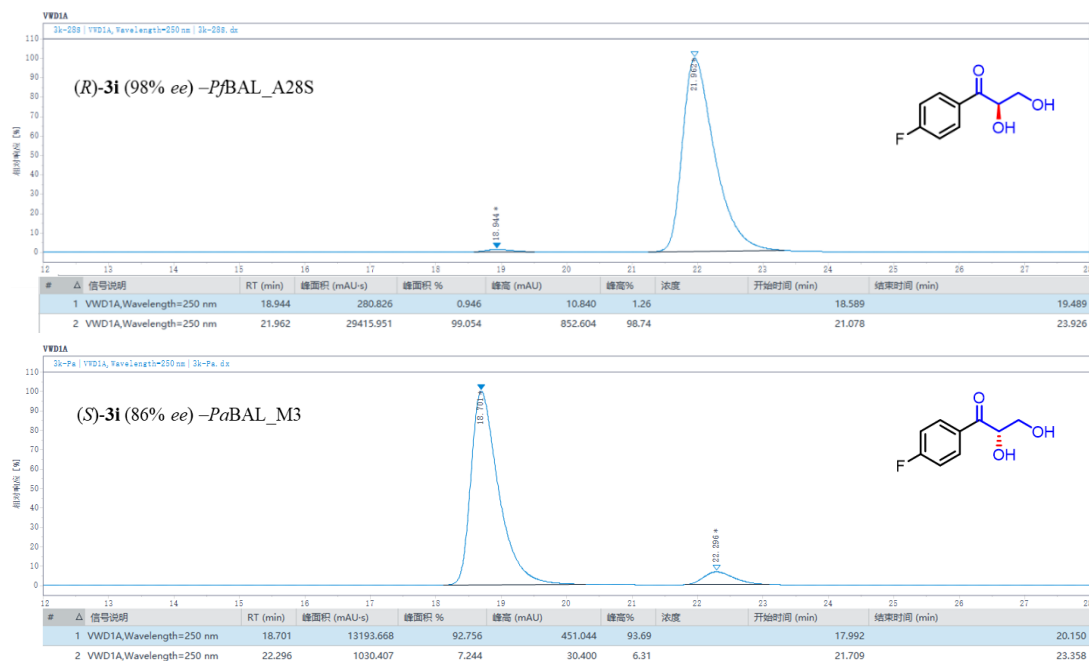

HPLC chromatogram of racemate of 1-(4-fluorophenyl)-2,3-dihydroxypropan-1-one (**3i**), products of PfBAL\_A28S ((*R*)-**3i**) and PaBAL M3 ((*S*)-**3i**). HPLC conditions: DAICEL IA (*n*-hexane: *i*-PrOH = 90:10, Flow rate = 0.8 mL/min, UV = 250 nm):  $t_{R-major} = 21.962$  min (PfBAL\_A28S) and  $t_{R-major} = 18.701$  min (PaBAL M3).

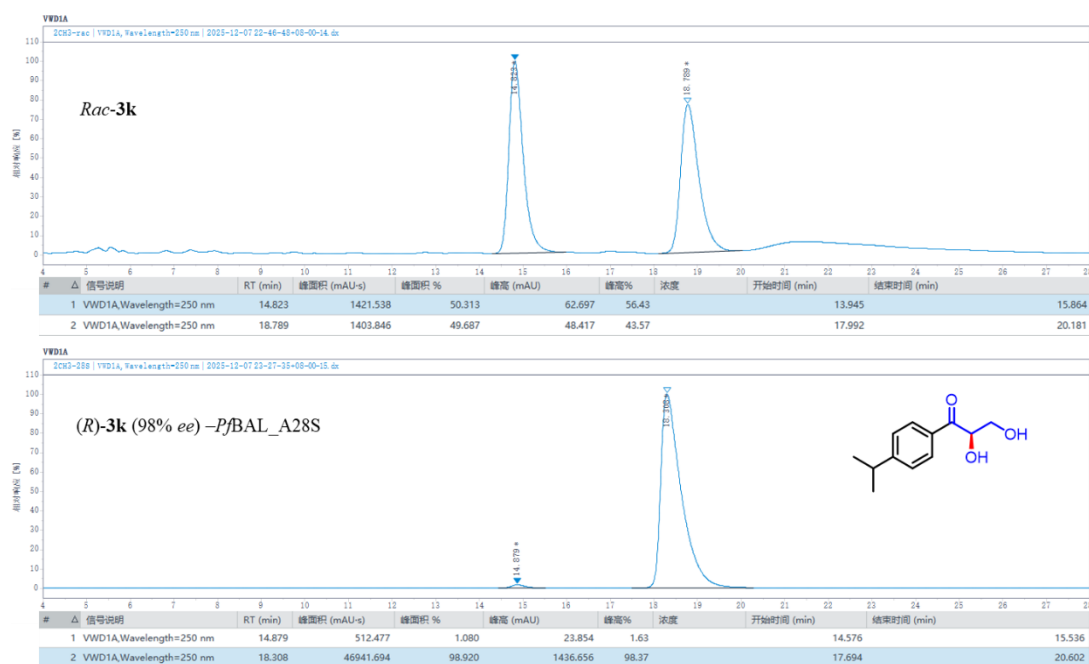

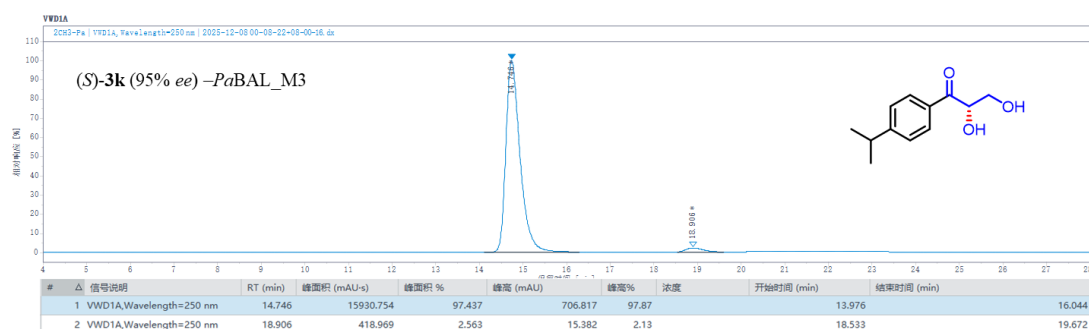

HPLC chromatogram of racemate of 2,3-dihydroxy-1-(4-isopropylphenyl)propan-1-one (**3k**), products of *Pf*BAL\_A28S ((*R*)-**3k**) and *Pa*BAL M3 ((*S*)-**3k**). HPLC conditions: DAICEL IA (*n*-hexane: *i*-PrOH = 90:10, Flow rate = 0.8 mL/min, UV = 250 nm):  $t_{R-major} = 18.308$  min (*Pf*BAL\_A28S) and  $t_{R-major} = 14.746$  min (*Pa*BAL M3).

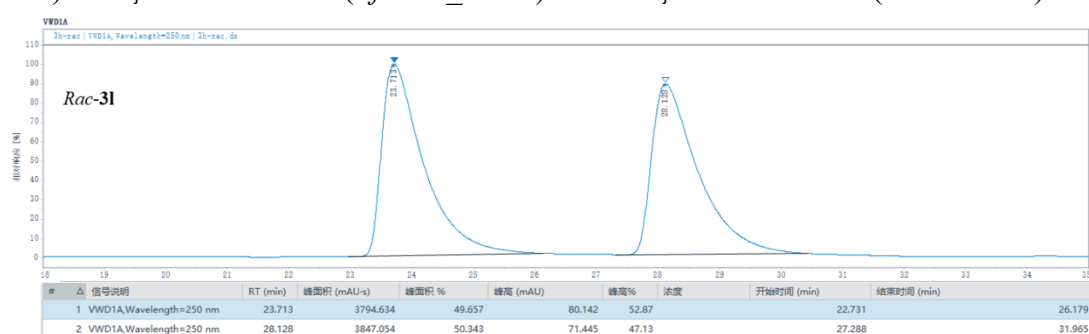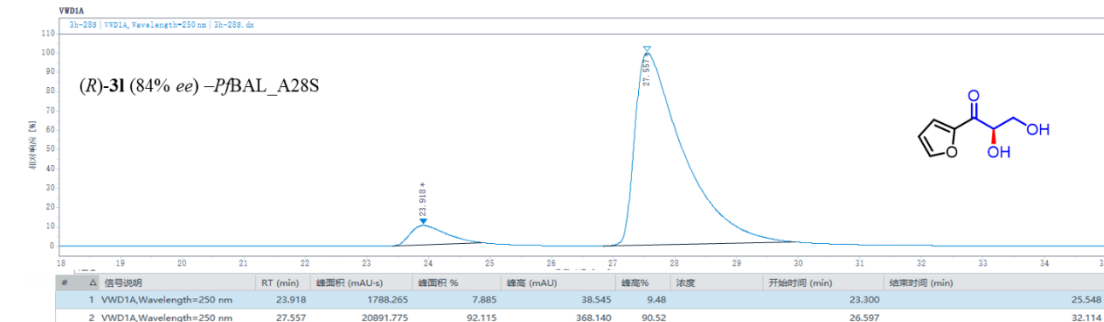

HPLC chromatogram of racemate of 1-(furan-2-yl)-2,3-dihydroxypropan-1-one (**3l**), products of *Pf*BAL\_A28S ((*R*)-**3l**). HPLC conditions: DAICEL IA (*n*-hexane: *i*-PrOH = 90:10, Flow rate = 0.8 mL/min, UV = 250 nm):  $t_{R-major} = 27.557$  min (*Pf*BAL\_A28S).

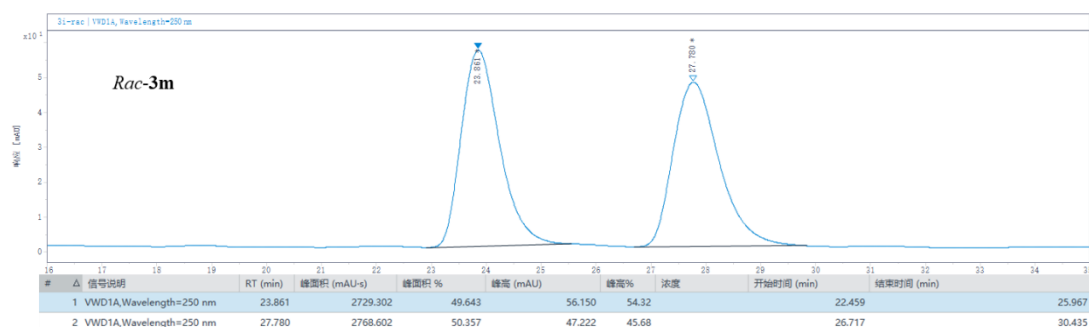

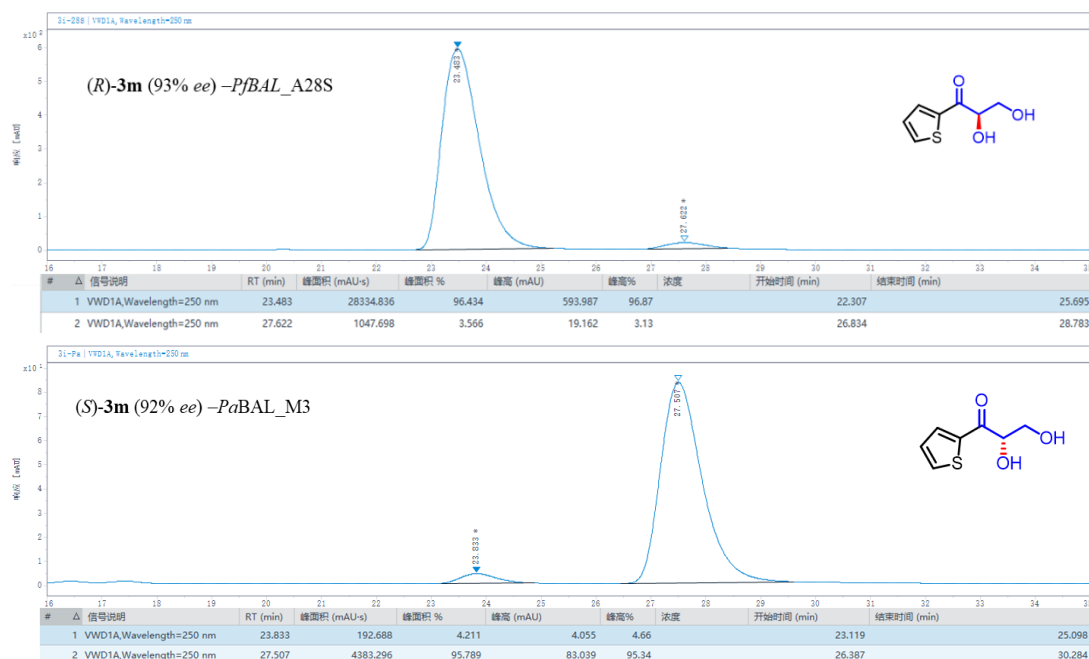

HPLC chromatogram of racemate of 1-(3-chloro-4-fluorophenyl)-2,3-dihydroxypropan-1-one (**3m**), products of *PfBAL\_A28S* (*(R)*-**3m**) and *PaBAL M3* (*(S)*-**3m**). HPLC conditions: DAICEL IC (*n*-hexane: *i*-PrOH = 85:15, Flow rate = 0.8 mL/min, UV = 250 nm):  $t_{R-major} = 23.483$  min (*PfBAL\_A28S*) and  $t_{R-major} = 27.507$  min (*PaBAL M3*).

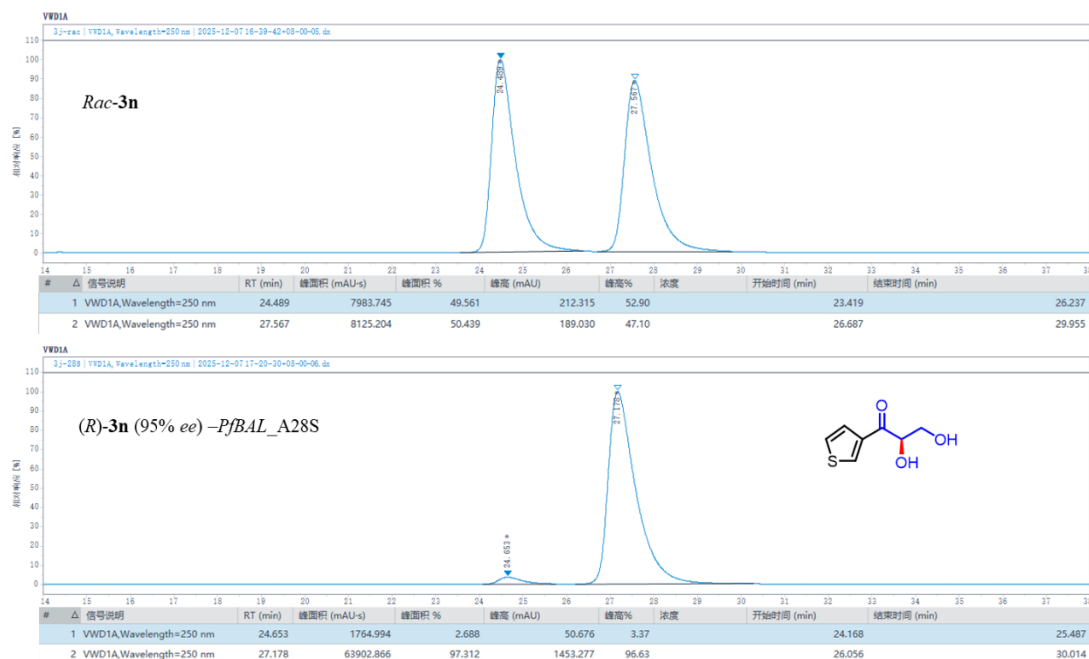

HPLC chromatogram of racemate of 2,3-dihydroxy-1-(thiophen-3-yl)propan-1-one (**3n**), products of *PfBAL\_A28S* (*(R)*-**3n**). HPLC conditions: DAICEL IA (*n*-hexane: *i*-PrOH = 90:10, Flow rate = 0.8 mL/min, UV = 250 nm):  $t_{R-major} = 27.178$  min (*PfBAL\_A28S*).

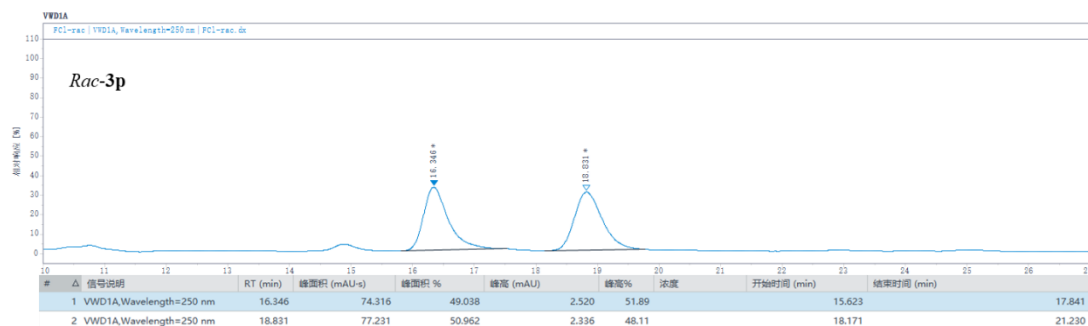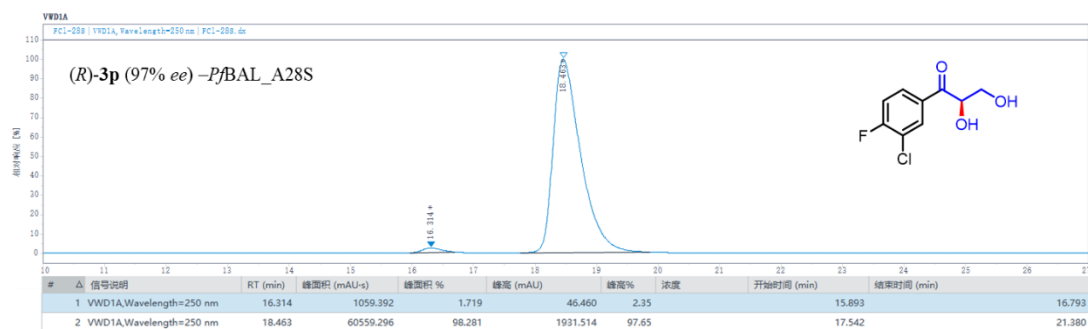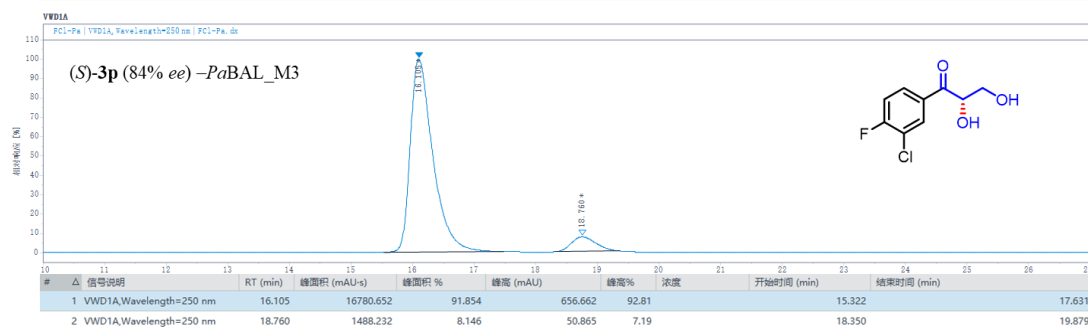

HPLC chromatogram of racemate of 1-(3-chloro-4-fluorophenyl)-2,3-dihydroxypropan-1-one (**3p**), products of *PfBAL\_A28S* ((*R*)-**3p**) and *PaBAL M3* ((*S*)-**3p**). HPLC conditions: DAICEL IA (*n*-hexane: *i*-PrOH = 90:10, Flow rate = 0.8 mL/min, UV = 250 nm);  $t_{R-major} = 18.463$  min (*PfBAL\_A28S*) and  $t_{R-major} = 16.105$  min (*PaBAL M3*).

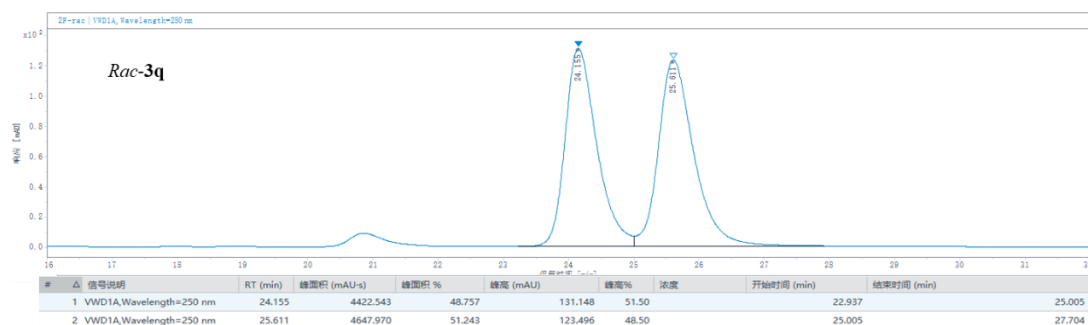

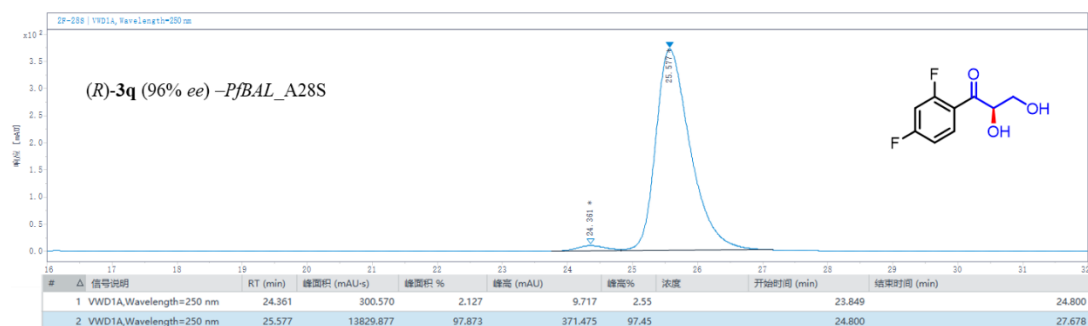

HPLC chromatogram of racemate of 1-(3-chloro-4-fluorophenyl)-2,3-dihydroxypropan-1-one (**3q**), products of *PfBAL\_A28S* ((*R*)-**3q**). HPLC conditions: DAICEL IA (*n*-hexane: *i*-PrOH = 93:7, Flow rate = 0.8 mL/min, UV = 250 nm):  $t_{R-major} = 25.577$  min (*PfBAL\_A28S*).

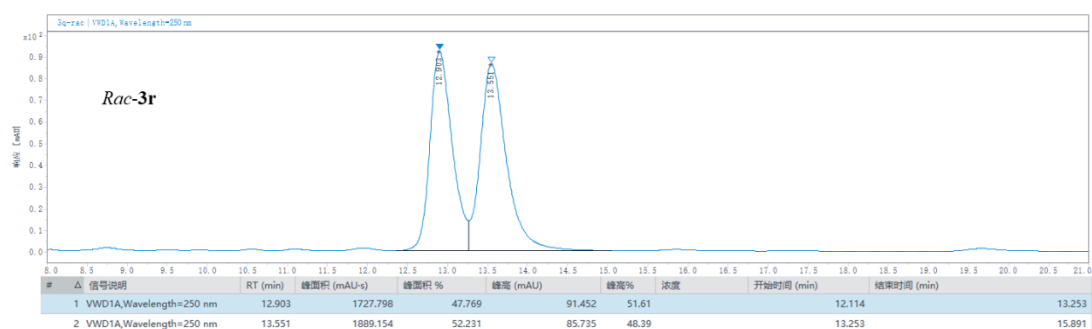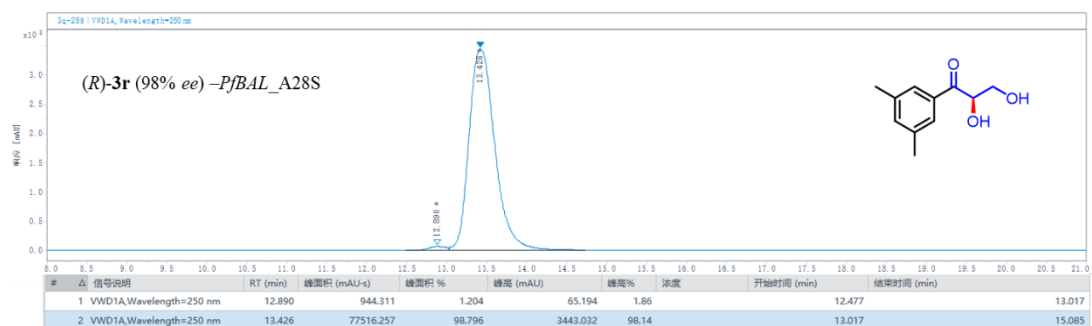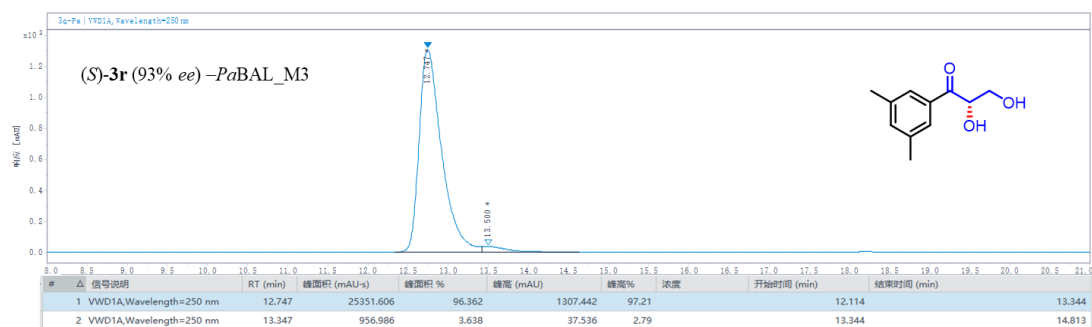

HPLC chromatogram of racemate of 1-(3,5-dimethylphenyl)-2,3-dihydroxypropan-1-one (**3r**), products of *PfBAL\_A28S* ((*R*)-**3r**) and *PaBAL M3* ((*S*)-**3r**). HPLC conditions: DAICEL IA (*n*-hexane: *i*PrOH = 90:10, Flow rate = 0.8 mL/min, UV = 250 nm):  $t_{R-major} = 13.426$  min (*PfBAL\_A28S*) and  $t_{R-major} = 12.747$  min (*PaBAL M3*).

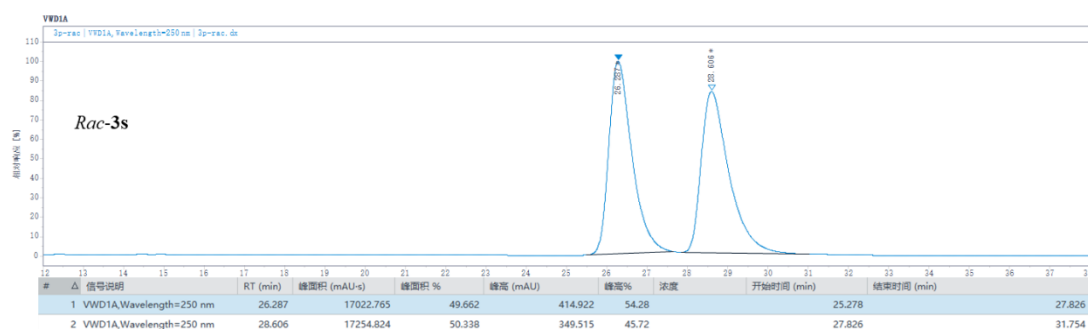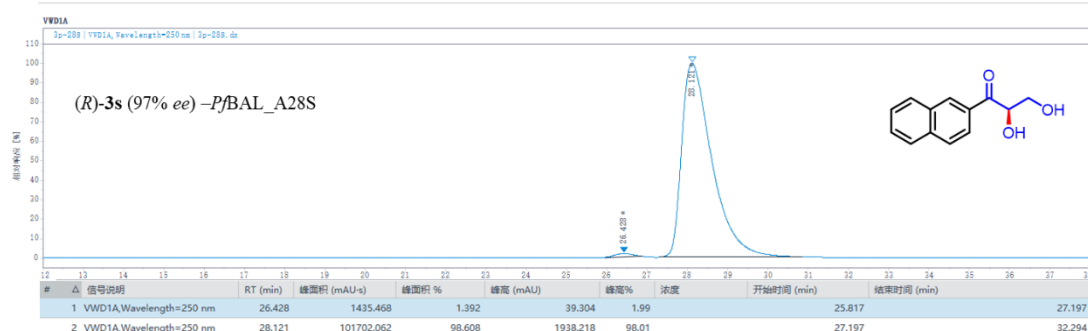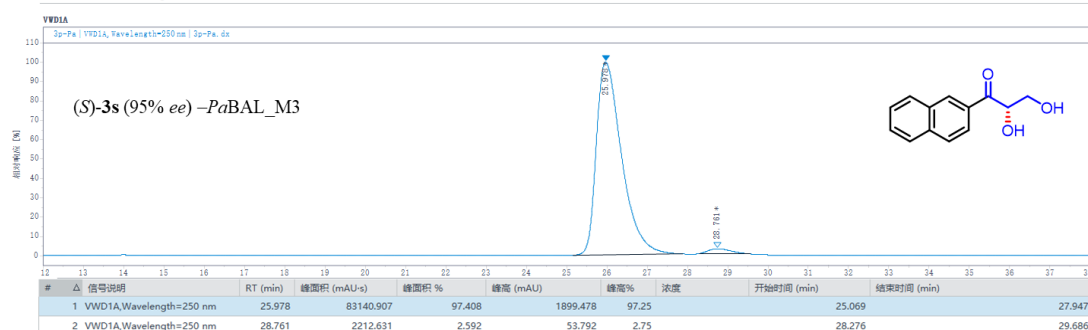

HPLC chromatogram of racemate of 2,3-dihydroxy-1-(naphthalen-2-yl)propan-1-one (**3s**), products of PfBAL\_A28S ((R)-**3s**) and PaBAL M3 ((S)-**3s**). HPLC conditions: DAICEL IA (*n*-hexane: *i*-PrOH = 90:10, Flow rate = 0.8 mL/min, UV = 250 nm):  $t_{R-major}$  = 28.121 min (PfBAL\_A28S) and  $t_{R-major}$  = 25.978 min (PaBAL M3).

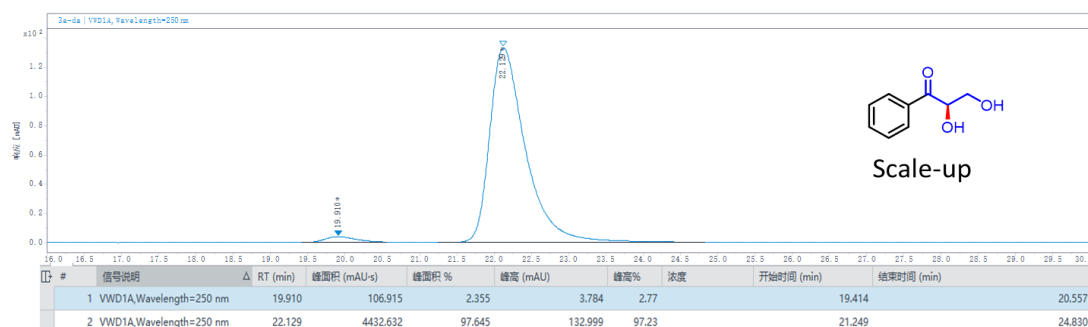

HPLC chromatogram of scale-up biotransformation product of **3a**. HPLC conditions: DAICEL IA (*n*-hexane: *i*-PrOH = 90:10, Flow rate = 0.8 mL/min, UV = 250 nm):  $t_{R-major}$  = 22.129 min and  $t_{R-major}$  = 19.910 min

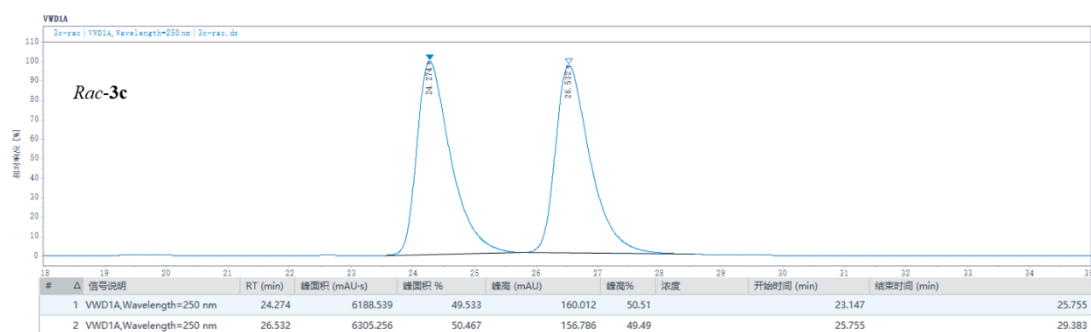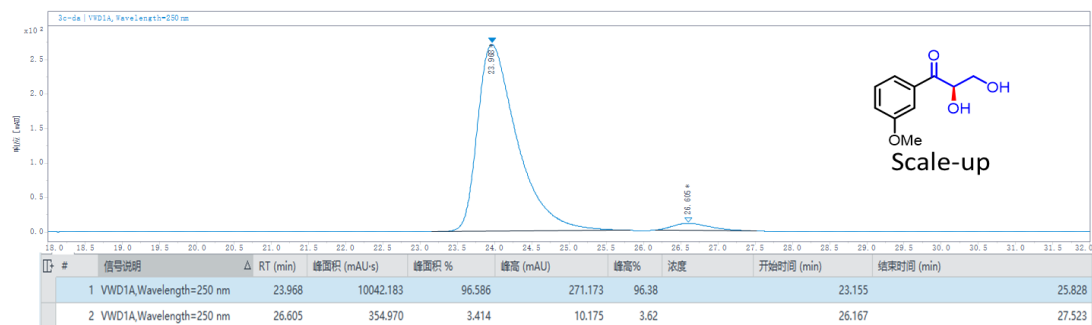

HPLC chromatogram of scale-up biotransformation product of **3c**.

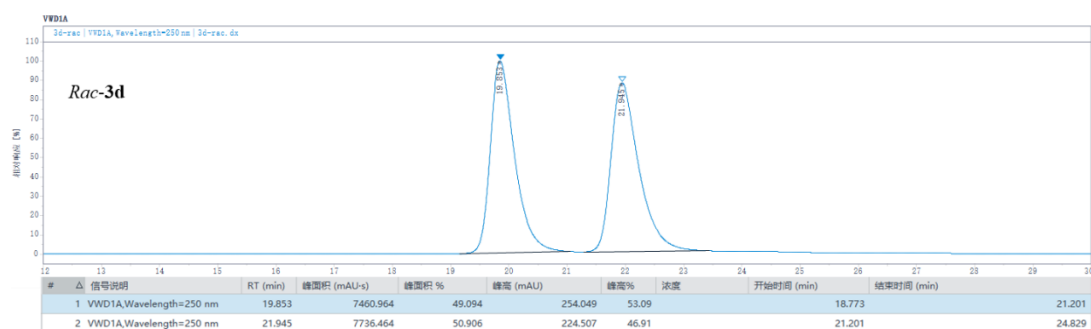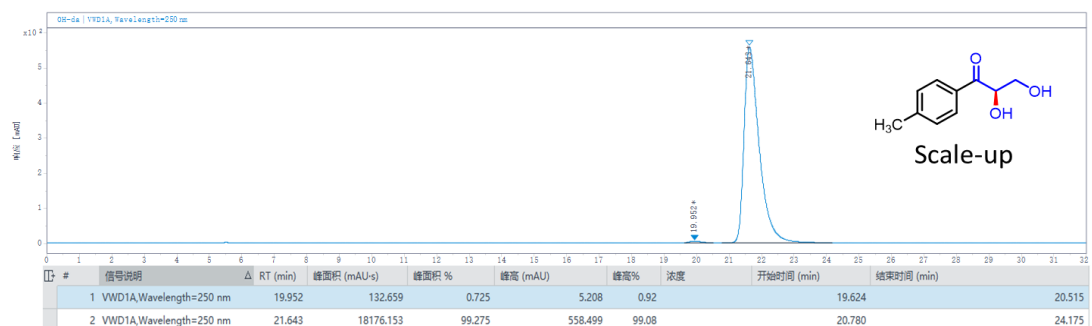

HPLC chromatogram of scale-up biotransformation product of **3d**.

## 20. Supplementary References

- [1] Z. Yang, X. Zeng, Y. Zhao, *Sig Transduct Target Ther*, 2023, **8**, 115.
- [2] O. Trott, A. J. Olson, *J. Comput. Chem.*, 2010, **31**, 45.
- [3] S. M. Husain, T. Stillger, P. Dünkemann, M. Lödige, L. Walter, E. Breitling, M. Pohl, M. Büchner, I. Krossing, M. Müller, D. Romano, F. Molinari, *Adv. Synth. Catal.*, 2011, **353**, 2359-2362.
- [4] G. Zhao, P. Dziedzic, I. Ibrahim, A. Córdova, *Synlett*, 2006, **20**, 3521-3524.
- [5] D. Van Der Spoel, E. Lindahl, B. Hess, G. Groenhof, A. E. Mark and H. J. C.

- Berendsen, *J. Comput. Chem.*, 2005, **26**, 1701-1718.
- [6] W. L. Jorgensen, J. Chandrasekhar, J. D. Madura, R. W. Impey, M. L. Klein, *J. Chem. Phys.*, 1983, **79**, 926-935.
- [7] J. A. Maier, C. Martinez, K. Kasavajhala, L. Wickstrom, K. E. Hauser, C. Simmerling, *J. Chem. Theory Comput.*, 2015, **11**, 3696-3713.
- [8] F. Weigend, R. Ahlrichs, *Phys. Chem. Chem. Phys.*, 2005, **7**, 3297-3305.
- [9] M. Schauerperl, P. S. Nerenberg, H. Jang, L.-P. Wang, C. I. Bayly, D. L. Mobley, M. K. Gilson, *Commun Chem*, 2020, **3**, 44.
- [10] G. Bussi, D. Donadio, M. Parrinello, *J. Chem. Phys.*, 2007, **126**, 014101.
- [11] M. Parrinello, A. Rahman, *Journal of Applied Physics*, 1981, **52**, 7182-7190.
- [12] M. S. Valdés-Tresanco, M. E. Valdés-Tresanco, P. A. Valiente, E. Moreno, *J. Chem. Theory Comput.*, 2021, **17**, 6281-6291.

## 21. Sequences of proteins

### Protein sequence of SsBAL

MPLVSGGELVVRLQLQAGVDRMFGINGAHIDAVYQAALDHRLPIVDTRHEM  
 NAGHAAEGYARVRNALGVALLTAGGGFTNAVTSMANAHLDRTPVLYLAASG  
 PLADDQNTLQAGLDQVAIATPVTKWAHRVTRASLIPRILARAIPTALSAPRGP  
 VLVDIPWDVLTEQVDLPDLATELLHGADHGPGLSQAGADRILALLSEARRPVV  
 AVGSEVPRSGAGGEVRAFAERLGVPLLSDYEGLGAISPSPMNFGVLVQSLHGLP  
 AGAEPDLVIMAGLRFGLTTAHGSGALIPRTARVLQIDPSGAELGHLQPVALSVA  
 ADPLPVFQDLNRVLAVRQSAARPDADWRDTLHAHLRRRREAVAAQVVQDE  
 RVHPYDAVCVIAEALPDASVVVADGALTYLWLSETISSAPVSAFLCHGYLGSM  
 GVGMGIALGAQAAVEPGTNVVLVTGDGSGVYSLGEFDSMVRAGLGAVVVVL  
 NNRAWGATLHAQEIMHGKDRVVNNRLENGSYAAAIALGADGYQVRTLDEL  
 APALAKALRSRPSCEVHVSLDPIPPEERVIMGGSPF

### Protein sequence of SuBAL

MATVTGSGLVVRTLQRAGVHVAFGLPGAHIDPILQEALDAKLRVVDVRHEMN  
 AGHAAEGYARVTGDLGVAVVTAGGGFTNVLTSTINAYLDRTPVLYIAGSGPLD  
 RDQINDQQAGFDQVAMAAPVTRFAHRVTRADLIPRLVAQAIRTAQSEPKGPVL  
 LDIPWDVLRQTVDVDEVEDYRVQIDGTGIAPAGAVDRILEALSAARRPIALVG  
 KSFVTAEARAQLHEFSARTGVPLFSDWEGLGAIVGSEQHAGLVQSLATVPEDE  
 RPDVLLLGLRFGMMTQFGTGGLMPKSARIFQIDPDGRELGRLEVEELGIQAD  
 PIGTIGLLNERLGDSPVPPGRDDWLKTLRDVSAARRSALAAETQHHEGAIHPY  
 LAVRTIAESVPDGATVLVDGALTELWLSETIALAPLAHYLNHGYLSSMGSNFG  
 VALGAQYATPKATILVTGDGAVGYSLAEFDTLVRARLPVIVIVLNNRAWGAT  
 LHTQQFLFGQDRVTNNRLENGSYSGVARALGADGVDVTELDQLRPAIEAALA  
 ARRPTCIDLRVSLEPIPPEERVMSGKAPFDVVQTDA

**Protein sequence of *AsBAL***

MDPNGGILLARTLAEIPIVFTLHGGHLDSFYRGCADDEGIELLDFRHEAAAVN  
AADGYARVTGGLGVAAVTSGPGFANGFAGITNAYADGVPLLVVVAAPPLREAE  
TRELQGGIDQIAALKPVTKWAHRITDPARIPDLVGLAVRRALSDRPGPVALELP  
IDVAFAPVDPARVRPAGRPDLGARTGPGRRALAGALRALDGAERPVLAGEG  
LRWSRDRRILIDFAEASGIPVLSGGPASRGLPPGHPLNNGRGVATLAALAMSSGA  
TPDVVMLLGFTPGMHSGGRPGAVIPADAEIVQVDPDAAEIGRLGPVHVAVQA  
DPAETLAAMLAAHDGPWPARKEWAETLMGASRLPDLLFADAPDVVNGRIHP  
HHATREALAALDPGSIVVADGGESLAWTMSAAFSADIDLVVGLGHQGHGVLG  
HGFAIGAQRAEPGRRVVQITGDGAVGFHIQELDTMVRHELPIVTVVLSNDTW  
GMSIHSQDVLFGAGNDIVTRLAPTRYEKVAEAFGAYGEHVEKPGEIGPAIRRA  
LDSGRPALINVAISNEVVHPVTTSMGLGDVTTTDEIVIPYYENIPLR

**Protein sequence of *PaBAL***

MSSPEARYTGGDLLAQTLDAGVTKIFALHGGHHEALFKGCIDQGIDLIDFRH  
EAAAGHAADAYARTTGKLGVCITAGPGFTNAISAIANAQLDASPVLFLIGAPP  
LREVETNPLQGGIDQIAMARPAKWALSIPSTERVRDLTAMAIKAMTGRKGP  
VVLEIPIDILHMSVTGAQATPSAGLAVRPQAPAPEEVAALAEALLRAERPVIVA  
GLESASAATAVALRALVAKLPLPVFAKPQAYGLLPAGHACDAGAAGNLAVLPII  
GAGAPDLVILLGARLGLMLGGRSGALVPHDAHVVQIYSDASEIGRLRDIDLP  
AADCAQTLTALTKALAAVDLPDTSAWTARAAGAKALAASAWPDAEVAGGIH  
PYHAAKAVANAAGQDAAYVFDGGESSSWGATVAVDAPARVLSHGYLEGCLGI  
GPGFAIGMQIAHPDRRVVQVTGDGAMGFHIQEFDTMVRHRLPIVTVILNNQV  
WGMSIHGQMMYGANYNVITKLGSTQYASIAAFAFGCHAERVTAFAEIAPAM  
ARAFASGKPALVEIMTDADVHPATVAMLGQLAEGSRDIMIPYYENIAAS

**Protein sequence of *EcMend***

MSVSAFNRRAAVILEALTRHGVRHICIAPGSRSTPLTLAAEAENSAFIHHTHF  
DERGLGHLALGLAKVSKQPVAVIVTSGTAVANLYPALIEAGLTGEKLILLTAD  
RPPELIDCGANQAIRQPGMFASHPTHSISLPRPTQDIPARWLSTIDHALGTLH  
AGGVHINCPFAEPLYGEMDDTGLSWQQRLGDWWQDDKPWLREAPRLESEK  
QRDWFFWRQKRGVVVAGRMSAEEGKKVALWAQTLGWPLIGDVLSQTGQPL  
PCADLWLGNAKATSELQQAQIVVQLGSSLTGKRLQWQASCEPEEYWIVDDI  
EGRLDPAHHRGRRLIANIADWLELHPAEKRQPWCVEIPRLAEQAMQAVIARR  
DAFGEAQLAHRICDYLPEQGQLFVGNSLVVRLIDALSQLPAGYPVYSNRGAS  
GIDGLLSTAAGVQRASGKPTLAIVGDLSALYDLNALALLRQVSAPLVLIVVNN  
NGGQIFSLPTPQSERERFYLMPQNVHFEHAAAMFELKYHRPQNWQELETAF  
ADAWRTPTTTTVIEMVVNDTDGAQTLQQLLAQVSHL

### **Protein sequence of *SsBFD***

MSSVRRVSHDFLERQGLTTFVFGNPGSNELPFLAGLPEGFRYVLGLHEGAVVG  
MADGYAQATGRPVLVNLHAASGSGNAMGALTNAVAARTPLVVLAGQQVRPA  
IGPEANLASVDAPALMKPLVGWAAEPACAEDVPRALAQAVFEARLQRRPTYL  
SVPYDDWSAEAGDNAAVLDRRVELAAVPGAGQGQRLVERVAAARRPALVL  
GGDIDSGLFDDAVHLAERLGAPVWAAPSLFRLPFPNRHPQFQGVLPAGIAPV  
SAAFEGHDLVVLGAPVFRYHEHLPGAYLPEGTRLVQVTGDASAAARAPMGE  
ALVADPSAVVDLLLKSLDAPARPAPPYRPVPAPLTAEGPGLHPEQVFAALRDEL  
PEDTAYVVESTSTNAAWWRQMDLRRPGSYFFPAAGGLGFGLPGAVGVAMAR  
PDRPVAVVGDGSANYGITALWTAAQHRIPLTVVLLRNGTYGALRWFGGLLG  
VPDAPGLDIPGLDFTRIAEGYGVAARHVEGAEELRAVLAEPAAGPRLIQVDTA  
LTTPS

### **Protein sequence of *KdcA***

MYTVGDYLLDRLHELGIEEIFGVPGDYNLQFLDQIISREDMKWIGNANELNASYMADGYA  
RTKKAAAFLLTFGVGELSAINGLAGSYAENLPVVEIVGSPTSQVQNDGKQVHHTLADGDF  
KHFMMHEPVTAARTLLTAENATYEIDRVLSQLLKERPVIINLPVDVAAAKAEKPALSLE  
KESSTNTTEQVILSKIEESLKNAQKPVVIAGHEVISFGLEKTVTQFVSETKLPITTLNFGK  
SAVDESLPSFLGIYNGKLSEISLKNFVESADFILMLGVKLTDSSTGAFTHHLDENKMISLNI  
DEGIIFNKVVEDFDRAVVSSSELKGIYEGQYIDKQYEEFIPSSAPLSQDRLWQAVESL  
TQSNETIVAEQGTSFFGASTIFLKSNSRFIGQPLWGSIGYTFPAALGSQIADKESRHLLFIG  
DGSLQTLVQELGLSIREKLNPICFIINNDGYTVEREIHGPTQSYNDIPMWNYSKLPETFGA  
TEDRVVSKIVRTENEFVSMKEAQADVNRMYWIELVLEKEDAPKLLKKMGKLFQEQNK

### **Protein sequence of *AnPDC***

MYIEIGNFLNQRLLKQAGISHIFGVPGDFNLAYLEQIEADTELQFIGTCNELNGA  
YAADGYARIQNLSVMVTTYGVGDLSAINGIAGAYSEHIPVVHISGIPPLHAVKN  
GAQLHHTLLDGNVDHIMNCMKPFTVAQTRLTPENAAAYEIDRVLQACLTYKRPI  
HIQLPSDITHIKIQTPTHPFQYKPYVTEPSYLNNTVVHKLKDKLASAQKPTLLID  
HLAQKFGFANIIQNISEQYKIPLVSLGTAKNIINEAAPNYLGVYSGASSPTDIKN  
AVEQSDCLLCIGTQFADVNTAIFSQNIPYQNTILIQPYDVKLNHEYEGIEATTL  
LKHIFNIHEQPLENINSEKQAPTHKNSKEPLSNATLWPQISSFLRDGDIVLGEAG  
CSSSGLNGISLPFKAKYISQPIWGSIGYTLPALVGTLFAQPQARHILFIGDGSLLQ  
TAQEISTIVRYKLPKPIIFILNNGGYTIERKILGAEAKYNDIHNWRYTELAHVFGY  
EAQTFHVETLKLHQLSTLSTLTPNQTLIELKLPKLDAPESLNKFGPIVAQYDY  
GKHTMSQIKKD

### **Protein sequence of *EcTK***

MSSRKELANAIRALSMDAVQKAKSGHPGAPMGADIAEVLWRDFLKHNPQN  
PSWADRDRFVLSNGHGSMLIYSLLHLTGYDLPMEELKNFRQLHSKTPGHPEV  
GYTAGVETTTGPLGQGIANAVGMAIAEKTLLAAQFNRPGHDIVDHYTYAFMGD  
GCMMEGISHEVCSLAGTLKLGKLIIFYDDNGISIDGHVEGWFTDDTAMRFEA  
YGWHVIRDIDGHDAASIKRAVEEARAVTDKPSLLMCKTIIGFGSPNKAGTHDS  
HGAPLGDAEIALTREQLGWKYAPFEIPSEIYAQWDAKEAGQAKESAWNEKFA  
AYAKAYPQEAEEFTRRMKGEMPSDFDAKAKEFIAKLQANPAKIASRKASQNA  
IEAFGPLLPEFLGGSADLAPSNLTLWSGSKAINEDAAGNYIHYGVREFGMTAIA  
NGISLHGGFLPYTSTFLMFVEYARNAVRMAALMKQRQVMVYTHDSIGLGED  
GPTHQPVEQVASLRVTPNMSTWRPCDQVESAVAWKYGVERQDGPTALILSRQ  
NLAQQERTEEQLANIARGGYVLKDCAGQPELIFIATGSEVELAVAAYEKLTAEG  
VKARVVSMPSTDAFDKQDAAYRESVLPKAVTARVAVEAGIADYWYKYVGLN  
GAIVGMTTFGESAPAELLFEEFGFTVDNVVAKAKELL

**Protein sequence of *ScTK***

MTQFTDIDKLAVSTIRILAVDTVSKANSHPGAPLGMAPAHHVLSQMRMNP  
TNPDWINRDRFVLSNGHAVALLYSMLHLTGYDLSIEDLKQFRQLGSRTPGHPE  
FELPGVEVTTGPLGQGISNAVGMAMAQANLAATYNKPGFTLSDNYTYVFLGD  
GCLQEGISSEASSLAGHLKLGNIYDDNKITIDGATSISFDEDVAKRYEAYG  
WEVLYVENGNEDLAGIAKAIQAQKLSKDKPTLIKMTTIGYGLHAGSHSVH  
GAPLKADDVKQLKSKFGFNPKSFFVPPQEVYDHYQKTILKPGVEANNKWNK  
LFSEYQKKFPELGAELARRLSGQLPANWESKLPTYTAKDSAVATRKLSETVLE  
DVYNQLPELIGGSADLTPSNLTRWKEALDFQPPSSGSGNYSGRYIRYGIREHA  
MGAIMNGISAFGANYPYGGTFLNFVSYAAGAVRLSALSHPVIWVATHDSIG  
VGEDGPTHQPIETLAHFRSLPNIQVWRPADGNEVSAAYKNSLESKHTPSIIALS  
RQNLPLQLEGSSIESASKGGYVLQDVANPDIIIVATGSEVSLSVEAAKTLAAKNI  
KARVVSPLPDFFTFDKQPLEYRLSVLPDNPIMSVEVLATTCWGKYAHQSFQID  
RFGASGKAPEVFKFFGFTPEGVAERAQKTIAFYKGDKLISPLKKAFF

**Protein sequence of *PfBAL***

MAMITGGELVVRTLKAGVEHLFGLHGAHIDTIFQAACLDHDVPIIDTRHEAAA  
GHAAEGYARAGAKLGVALVTAGGGFTNAVTPIANAWLDRTPVFLTGSGALR  
DDETNTLQAGIDQVAMAAPITKWAHRVMATEHIPRLVMQAIRAALSAPRGPV  
LLDLPWDILMNQIDEDSVIIPDLVLSAHGARPDPADLDQALALLRKAERPVIIVL  
GSEASRTARKTALSFAATGVPVFADYEGLSMLSGLPDAMRGGGLVQNLYSFA  
KADAAPDLVLMGARFGLNTGHGSGQLIPHSAQVIQVDPDACELGRLQGIAL  
GIVADVGGTIEALAQAQDAAWPDRGDWCAKVTDLAQERYASIAAKSSSEH  
ALHPFHASQVIAKHVDAGVTVVADGALTYLWLSEVMSRVKPGGFLCHGYLG  
SMGVGFGTALGAQVADLEAGRRTILVTGDGSGVGSIGEFDTLVRKQLPLIVIIM

NNQSWGATLHFQQLAVGPNRVTGTRLENGSYHGVAAAFADGYHVDSVESF  
SAALAQALAHNRPAVINVAVALDPIPPEELILIGMDPFA
